# Supplementary material for: Research Hotspots and Trends Analysis of TFEB: A Bibliometric and Scientometric Analysis
Source: Front Mol Neurosci. 2022 Apr 21;15:854954. doi: 10.3389/fnmol.2022.854954 (PMC9069162; doi:10.3389/fnmol.2022.854954)
Supplement: Supplementary file 11 [file Table_1.XLSX]

## Sheet: publications and citations
Year	Publications	Citations
1991	2	0
1992	1	0
1993	2	0
1994	2	0
1995	2	0
1996	2	9
1997	0	18
1998	5	17
1999	2	19
2000	3	21
2001	4	17
2002	3	21
2003	5	37
2004	4	44
2005	8	58
2006	6	69
2007	5	114
2008	4	90
2009	4	139
2010	2	146
2011	15	215
2012	15	309
2013	31	536
2014	39	774
2015	51	1058
2016	74	1509
2017	100	1682
2018	116	1758
2019	165	2209
2020	184	2614
2021	203	2855

## Sheet: research areas
research areas	count	% of 1,059
Cell Biology	340	32.106
Biochemistry Molecular Biology	209	19.736
Multidisciplinary Sciences	99	9.348
Oncology	88	8.31
Medicine Research Experimental	74	6.988
Pathology	72	6.799
Pharmacology Pharmacy	64	6.043
Neurosciences	63	5.949
Genetics Heredity	39	3.683
Chemistry Multidisciplinary	37	3.494
Immunology	33	3.116
Biology	31	2.927
Developmental Biology	29	2.738
Endocrinology Metabolism	23	2.172
Physiology	23	2.172
Surgery	23	2.172
Geriatrics Gerontology	22	2.077
Toxicology	22	2.077
Biophysics	21	1.983
Hematology	20	1.889
Biotechnology Applied Microbiology	19	1.794
Microbiology	19	1.794
Nanoscience Nanotechnology	13	1.228
Cardiac Cardiovascular Systems	12	1.133
Food Science Technology	12	1.133
Peripheral Vascular Disease	11	1.039
Biochemical Research Methods	9	0.85
Materials Science Multidisciplinary	9	0.85
Chemistry Medicinal	8	0.755
Gastroenterology Hepatology	8	0.755
Chemistry Physical	7	0.661
Nutrition Dietetics	7	0.661
Parasitology	7	0.661
Urology Nephrology	7	0.661
Virology	7	0.661
Cell Tissue Engineering	6	0.567
Chemistry Applied	6	0.567
Environmental Sciences	6	0.567
Medical Laboratory Technology	6	0.567
Clinical Neurology	5	0.472
Integrative Complementary Medicine	5	0.472
Mathematical Computational Biology	5	0.472
Medicine General Internal	5	0.472
Reproductive Biology	5	0.472
Agriculture Multidisciplinary	4	0.378
Anatomy Morphology	4	0.378
Infectious Diseases	4	0.378
Materials Science Biomaterials	4	0.378
Ophthalmology	4	0.378
Plant Sciences	4	0.378
Respiratory System	4	0.378
Chemistry Organic	3	0.283
Orthopedics	3	0.283
Physics Applied	3	0.283
Physics Condensed Matter	3	0.283
Dentistry Oral Surgery Medicine	2	0.189
Engineering Biomedical	2	0.189
Obstetrics Gynecology	2	0.189
Pediatrics	2	0.189
Psychiatry	2	0.189
Substance Abuse	2	0.189
Transplantation	2	0.189
Agriculture Dairy Animal Science	1	0.094
Chemistry Analytical	1	0.094
Computer Science Interdisciplinary Applications	1	0.094
Critical Care Medicine	1	0.094
Dermatology	1	0.094
Education Scientific Disciplines	1	0.094
Engineering Environmental	1	0.094
Entomology	1	0.094
Gerontology	1	0.094
Marine Freshwater Biology	1	0.094
Microscopy	1	0.094
Polymer Science	1	0.094
Psychology	1	0.094
Radiology Nuclear Medicine Medical Imaging	1	0.094
Rheumatology	1	0.094
Statistics Probability	1	0.094
Veterinary Sciences	1	0.094
Water Resources	1	0.094

## Sheet: journals
journals	count	% of 1,059
AUTOPHAGY	77	7.271
NATURE COMMUNICATIONS	30	2.833
CELL DEATH DISEASE	27	2.55
JOURNAL OF BIOLOGICAL CHEMISTRY	24	2.266
SCIENTIFIC REPORTS	23	2.172
AMERICAN JOURNAL OF SURGICAL PATHOLOGY	18	1.7
INTERNATIONAL JOURNAL OF MOLECULAR SCIENCES	17	1.605
PROCEEDINGS OF THE NATIONAL ACADEMY OF SCIENCES OF THE UNITED STATES OF AMERICA	16	1.511
BIOCHEMICAL AND BIOPHYSICAL RESEARCH COMMUNICATIONS	12	1.133
EMBO JOURNAL	12	1.133
MODERN PATHOLOGY	11	1.039
OXIDATIVE MEDICINE AND CELLULAR LONGEVITY	11	1.039
PLOS ONE	11	1.039
AGING US	9	0.85
CELLS	9	0.85
ELIFE	9	0.85
EMBO MOLECULAR MEDICINE	9	0.85
FRONTIERS IN PHARMACOLOGY	9	0.85
HUMAN MOLECULAR GENETICS	9	0.85
MOLECULAR AND CELLULAR BIOLOGY	9	0.85
FRONTIERS IN CELL AND DEVELOPMENTAL BIOLOGY	8	0.755
JOURNAL OF CELLULAR AND MOLECULAR MEDICINE	8	0.755
JOURNAL OF NEUROSCIENCE	8	0.755
NATURE CELL BIOLOGY	8	0.755
AGING CELL	7	0.661
BIOCHIMICA ET BIOPHYSICA ACTA MOLECULAR BASIS OF DISEASE	7	0.661
CELL DEATH AND DIFFERENTIATION	7	0.661
CELL REPORTS	7	0.661
JOURNAL OF CELL BIOLOGY	7	0.661
ACTA PHARMACOLOGICA SINICA	6	0.567
CANCERS	6	0.567
DEVELOPMENTAL CELL	6	0.567
FASEB JOURNAL	6	0.567
HUMAN PATHOLOGY	6	0.567
JOURNAL OF CELL SCIENCE	6	0.567
JOURNAL OF CLINICAL INVESTIGATION	6	0.567
JOURNAL OF IMMUNOLOGY	6	0.567
MOLECULAR CELL	6	0.567
NEUROSCIENCE	6	0.567
PLOS GENETICS	6	0.567
SCIENCE SIGNALING	6	0.567
BIOCHEMICAL JOURNAL	5	0.472
CIRCULATION RESEARCH	5	0.472
ONCOTARGET	5	0.472
PHARMACOLOGICAL RESEARCH	5	0.472
PLOS BIOLOGY	5	0.472
ARTERIOSCLEROSIS THROMBOSIS AND VASCULAR BIOLOGY	4	0.378
BIOCHEMICAL PHARMACOLOGY	4	0.378
BIOCHIMICA ET BIOPHYSICA ACTA MOLECULAR CELL RESEARCH	4	0.378
BIOMEDICINE PHARMACOTHERAPY	4	0.378
CELL DEATH DISCOVERY	4	0.378
EMBO REPORTS	4	0.378
FREE RADICAL BIOLOGY AND MEDICINE	4	0.378
GENES DEVELOPMENT	4	0.378
INTERNATIONAL JOURNAL OF CLINICAL AND EXPERIMENTAL PATHOLOGY	4	0.378
INTERNATIONAL JOURNAL OF SURGICAL PATHOLOGY	4	0.378
JCI INSIGHT	4	0.378
JOURNAL OF AGRICULTURAL AND FOOD CHEMISTRY	4	0.378
NATURE	4	0.378
NATURE IMMUNOLOGY	4	0.378
NUCLEIC ACIDS RESEARCH	4	0.378
PLOS PATHOGENS	4	0.378
SCIENCE ADVANCES	4	0.378
VIRCHOWS ARCHIV	4	0.378
ACTA PHARMACEUTICA SINICA B	3	0.283
ADVANCES IN EXPERIMENTAL MEDICINE AND BIOLOGY	3	0.283
AMERICAN JOURNAL OF PHYSIOLOGY CELL PHYSIOLOGY	3	0.283
AMERICAN JOURNAL OF PHYSIOLOGY LUNG CELLULAR AND MOLECULAR PHYSIOLOGY	3	0.283
AMERICAN JOURNAL OF TRANSLATIONAL RESEARCH	3	0.283
ANTI CANCER DRUGS	3	0.283
ARCHIVES OF PATHOLOGY LABORATORY MEDICINE	3	0.283
CANCER	3	0.283
CANCER SCIENCE	3	0.283
CELL CHEMICAL BIOLOGY	3	0.283
CELLULAR SIGNALLING	3	0.283
CLINICAL CANCER RESEARCH	3	0.283
COMMUNICATIONS BIOLOGY	3	0.283
DEVELOPMENTAL DYNAMICS	3	0.283
ECOTOXICOLOGY AND ENVIRONMENTAL SAFETY	3	0.283
ENDOCRINOLOGY	3	0.283
EXPERIMENTAL CELL RESEARCH	3	0.283
EXPERIMENTAL NEUROLOGY	3	0.283
FOOD AND CHEMICAL TOXICOLOGY	3	0.283
FRONTIERS IN AGING NEUROSCIENCE	3	0.283
FRONTIERS IN PHYSIOLOGY	3	0.283
GASTROENTEROLOGY	3	0.283
GENES CHROMOSOMES CANCER	3	0.283
INFECTION AND IMMUNITY	3	0.283
ISCIENCE	3	0.283
JOURNAL OF CANCER	3	0.283
JOURNAL OF CLINICAL ONCOLOGY	3	0.283
JOURNAL OF EXPERIMENTAL CLINICAL CANCER RESEARCH	3	0.283
JOURNAL OF LIPID RESEARCH	3	0.283
JOURNAL OF PROTEOME RESEARCH	3	0.283
LIFE BASEL	3	0.283
LIFE SCIENCES	3	0.283
MOLECULAR AND CELLULAR NEUROSCIENCE	3	0.283
NEUROBIOLOGY OF DISEASE	3	0.283
NEUROTOXICITY RESEARCH	3	0.283
ONCOGENE	3	0.283
REDOX BIOLOGY	3	0.283
STEM CELLS	3	0.283
THERANOSTICS	3	0.283
ACS NANO	2	0.189
ALCOHOLISM CLINICAL AND EXPERIMENTAL RESEARCH	2	0.189
AMERICAN JOURNAL OF CLINICAL PATHOLOGY	2	0.189
AMERICAN JOURNAL OF PHYSIOLOGY GASTROINTESTINAL AND LIVER PHYSIOLOGY	2	0.189
ANTIOXIDANTS REDOX SIGNALING	2	0.189
AUTOPHAGY BIOLOGY AND DISEASES BASIC SCIENCE	2	0.189
BIOCHEMISTRY	2	0.189
BIOCHIMIE	2	0.189
BIOMED RESEARCH INTERNATIONAL	2	0.189
BIOMOLECULES	2	0.189
BLOOD	2	0.189
BMC CANCER	2	0.189
CANCER LETTERS	2	0.189
CANCER MANAGEMENT AND RESEARCH	2	0.189
CELL COMMUNICATION AND SIGNALING	2	0.189
CELL METABOLISM	2	0.189
CELL RESEARCH	2	0.189
CELLULAR AND MOLECULAR GASTROENTEROLOGY AND HEPATOLOGY	2	0.189
CELLULAR MICROBIOLOGY	2	0.189
CELLULAR PHYSIOLOGY AND BIOCHEMISTRY	2	0.189
CLINICAL SCIENCE	2	0.189
CURRENT BIOLOGY	2	0.189
DEVELOPMENT	2	0.189
DRUG DESIGN DEVELOPMENT AND THERAPY	2	0.189
FEBS OPEN BIO	2	0.189
FRONTIERS IN BIOSCIENCE LANDMARK	2	0.189
FRONTIERS IN IMMUNOLOGY	2	0.189
FRONTIERS IN MICROBIOLOGY	2	0.189
FRONTIERS IN ONCOLOGY	2	0.189
GENES TO CELLS	2	0.189
GENETICS	2	0.189
HISTOPATHOLOGY	2	0.189
IN VIVO	2	0.189
INTERNATIONAL JOURNAL OF BIOCHEMISTRY CELL BIOLOGY	2	0.189
INTERNATIONAL JOURNAL OF BIOLOGICAL SCIENCES	2	0.189
INTERNATIONAL JOURNAL OF MOLECULAR MEDICINE	2	0.189
INTERNATIONAL JOURNAL OF ONCOLOGY	2	0.189
INVESTIGATIVE OPHTHALMOLOGY VISUAL SCIENCE	2	0.189
JOURNAL FOR IMMUNOTHERAPY OF CANCER	2	0.189
JOURNAL OF ALZHEIMERS DISEASE	2	0.189
JOURNAL OF CELLULAR PHYSIOLOGY	2	0.189
JOURNAL OF ETHNOPHARMACOLOGY	2	0.189
JOURNAL OF EXPERIMENTAL MEDICINE	2	0.189
JOURNAL OF NANOBIOTECHNOLOGY	2	0.189
JOURNAL OF NEUROCHEMISTRY	2	0.189
JOURNAL OF NUTRITIONAL BIOCHEMISTRY	2	0.189
JOURNAL OF ORTHOPAEDIC SURGERY AND RESEARCH	2	0.189
JOURNAL OF PINEAL RESEARCH	2	0.189
LABORATORY INVESTIGATION	2	0.189
LANGMUIR	2	0.189
MOLECULAR AND CELLULAR BIOCHEMISTRY	2	0.189
MOLECULAR CARCINOGENESIS	2	0.189
MOLECULAR MEDICINE REPORTS	2	0.189
MOLECULAR NEUROBIOLOGY	2	0.189
MOLECULAR NUTRITION FOOD RESEARCH	2	0.189
MOLECULAR PSYCHIATRY	2	0.189
MOLECULAR THERAPY	2	0.189
NANOTOXICOLOGY	2	0.189
NATURE NEUROSCIENCE	2	0.189
NUTRIENTS	2	0.189
PATHOLOGY INTERNATIONAL	2	0.189
PATHOLOGY RESEARCH AND PRACTICE	2	0.189
PLACENTA	2	0.189
SCIENCE	2	0.189
SCIENCE IMMUNOLOGY	2	0.189
SCIENCE TRANSLATIONAL MEDICINE	2	0.189
SMALL	2	0.189
TOXICOLOGY AND APPLIED PHARMACOLOGY	2	0.189
TOXICOLOGY LETTERS	2	0.189
3 BIOTECH	1	0.094
ACS APPLIED NANO MATERIALS	1	0.094
ACS BIOMATERIALS SCIENCE ENGINEERING	1	0.094
ACS CHEMICAL BIOLOGY	1	0.094
ACS OMEGA	1	0.094
ACTA BIOMATERIALIA	1	0.094
ACTA HISTOCHEMICA	1	0.094
ACTA MEDICA MEDITERRANEA	1	0.094
ACTA NEUROPATHOLOGICA	1	0.094
ACTA NEUROPATHOLOGICA COMMUNICATIONS	1	0.094
ADVANCED HEALTHCARE MATERIALS	1	0.094
ADVANCED SCIENCE	1	0.094
ALZHEIMERS DEMENTIA	1	0.094
AMERICAN JOURNAL OF CANCER RESEARCH	1	0.094
AMERICAN JOURNAL OF PHYSIOLOGY ENDOCRINOLOGY AND METABOLISM	1	0.094
AMINO ACIDS	1	0.094
ANALYTICAL AND QUANTITATIVE CYTOLOGY AND HISTOLOGY	1	0.094
ANALYTICAL BIOCHEMISTRY	1	0.094
ANNALS OF THE NEW YORK ACADEMY OF SCIENCES	1	0.094
ANNALS OF TRANSLATIONAL MEDICINE	1	0.094
ANNUAL REVIEW OF CANCER BIOLOGY SERIES	1	0.094
ANNUAL REVIEW OF CANCER BIOLOGY VOL 3	1	0.094
APOPTOSIS	1	0.094
APPLIED IMMUNOHISTOCHEMISTRY MOLECULAR MORPHOLOGY	1	0.094
ARCHIVES OF TOXICOLOGY	1	0.094
ASSAY AND DRUG DEVELOPMENT TECHNOLOGIES	1	0.094
AUTOPHAGY BIOLOGY AND DISEASES CLINICAL SCIENCE	1	0.094
BASIC RESEARCH IN CARDIOLOGY	1	0.094
BIOCHEMISTRY AND CELL BIOLOGY	1	0.094
BIOCHIMICA ET BIOPHYSICA ACTA MOLECULAR AND CELL BIOLOGY OF LIPIDS	1	0.094
BIOCONJUGATE CHEMISTRY	1	0.094
BIOINFORMATICS	1	0.094
BIOLOGICAL PHARMACEUTICAL BULLETIN	1	0.094
BIOLOGY OF REPRODUCTION	1	0.094
BIOLOGY OF THE CELL	1	0.094
BIOMATERIALS SCIENCE	1	0.094
BIOORGANIC CHEMISTRY	1	0.094
BIOSCIENCE BIOTECHNOLOGY AND BIOCHEMISTRY	1	0.094
BIOSCIENCE REPORTS	1	0.094
BIOTECHNOLOGY AND APPLIED BIOCHEMISTRY	1	0.094
BMC BIOINFORMATICS	1	0.094
BMC SYSTEMS BIOLOGY	1	0.094
BRITISH JOURNAL OF CANCER	1	0.094
BRITISH JOURNAL OF PHARMACOLOGY	1	0.094
CANCER BIOLOGY MEDICINE	1	0.094
CANCER BIOLOGY THERAPY	1	0.094
CANCER CHEMOTHERAPY AND PHARMACOLOGY	1	0.094
CANCER GENETICS AND CYTOGENETICS	1	0.094
CANCER IMMUNOLOGY RESEARCH	1	0.094
CANCER RESEARCH	1	0.094
CARBOHYDRATE POLYMERS	1	0.094
CELL	1	0.094
CELL BIOLOGY AND TOXICOLOGY	1	0.094
CELL BIOLOGY INTERNATIONAL	1	0.094
CELL CALCIUM	1	0.094
CELL HOST MICROBE	1	0.094
CELL PROLIFERATION	1	0.094
CELL STEM CELL	1	0.094
CELLULAR AND MOLECULAR LIFE SCIENCES	1	0.094
CELLULAR MOLECULAR BIOLOGY LETTERS	1	0.094
CELLULAR MOLECULAR IMMUNOLOGY	1	0.094
CHEMICAL RESEARCH IN TOXICOLOGY	1	0.094
CHINESE MEDICAL JOURNAL	1	0.094
CHINESE MEDICINE	1	0.094
CIRCULATION	1	0.094
CLINICAL AND EXPERIMENTAL PHARMACOLOGY AND PHYSIOLOGY	1	0.094
CLINICAL AND MOLECULAR HEPATOLOGY	1	0.094
CLINICAL GENITOURINARY CANCER	1	0.094
CLINICS IN LABORATORY MEDICINE	1	0.094
CLONING AND STEM CELLS	1	0.094
CNS NEUROSCIENCE THERAPEUTICS	1	0.094
COLD SPRING HARBOR PERSPECTIVES IN BIOLOGY	1	0.094
CURRENT DRUG TARGETS	1	0.094
CURRENT EYE RESEARCH	1	0.094
CURRENT NEUROPHARMACOLOGY	1	0.094
CURRENT OPINION IN CELL BIOLOGY	1	0.094
DATABASE THE JOURNAL OF BIOLOGICAL DATABASES AND CURATION	1	0.094
DEVELOPMENT GROWTH DIFFERENTIATION	1	0.094
DEVELOPMENTAL NEUROBIOLOGY	1	0.094
DIABETES	1	0.094
DISEASE MODELS MECHANISMS	1	0.094
DNA AND CELL BIOLOGY	1	0.094
EBIOMEDICINE	1	0.094
ENVIRONMENTAL TOXICOLOGY	1	0.094
EUROPEAN JOURNAL OF CELL BIOLOGY	1	0.094
EUROPEAN JOURNAL OF HAEMATOLOGY	1	0.094
EUROPEAN JOURNAL OF INFLAMMATION	1	0.094
EUROPEAN JOURNAL OF PHARMACOLOGY	1	0.094
EUROPEAN UROLOGY SUPPLEMENTS	1	0.094
EVIDENCE BASED COMPLEMENTARY AND ALTERNATIVE MEDICINE	1	0.094
EXPERIMENTAL AND MOLECULAR MEDICINE	1	0.094
EXPERIMENTAL AND MOLECULAR PATHOLOGY	1	0.094
EXPERIMENTAL AND THERAPEUTIC MEDICINE	1	0.094
FEBS LETTERS	1	0.094
FREE RADICAL RESEARCH	1	0.094
FRONTIERS IN CELLULAR NEUROSCIENCE	1	0.094
FRONTIERS IN HUMAN NEUROSCIENCE	1	0.094
FRONTIERS IN MARINE SCIENCE	1	0.094
GENE	1	0.094
GENES	1	0.094
GENOME RESEARCH	1	0.094
GENOMICS	1	0.094
HAEMATOLOGICA	1	0.094
HISTOLOGY AND HISTOPATHOLOGY	1	0.094
HYPERTENSION	1	0.094
IMMUNITY	1	0.094
INSECT BIOCHEMISTRY AND MOLECULAR BIOLOGY	1	0.094
INTERNATIONAL IMMUNOLOGY	1	0.094
INTERNATIONAL IMMUNOPHARMACOLOGY	1	0.094
INTERNATIONAL JOURNAL FOR PARASITOLOGY	1	0.094
INTERNATIONAL JOURNAL OF CANCER	1	0.094
INTERNATIONAL JOURNAL OF CARDIOLOGY	1	0.094
INTERNATIONAL JOURNAL OF NEUROSCIENCE	1	0.094
INTERNATIONAL JOURNAL OF OBESITY	1	0.094
INTERNATIONAL UROLOGY AND NEPHROLOGY	1	0.094
JAPANESE JOURNAL OF RADIOLOGY	1	0.094
JOURNAL OF ANIMAL SCIENCE AND BIOTECHNOLOGY	1	0.094
JOURNAL OF BACTERIOLOGY	1	0.094
JOURNAL OF BIOCHEMICAL AND MOLECULAR TOXICOLOGY	1	0.094
JOURNAL OF CACHEXIA SARCOPENIA AND MUSCLE	1	0.094
JOURNAL OF CARDIAC SURGERY	1	0.094
JOURNAL OF CLINICAL MEDICINE	1	0.094
JOURNAL OF DENTAL RESEARCH	1	0.094
JOURNAL OF ENDOCRINOLOGY	1	0.094
JOURNAL OF FOOD SCIENCE	1	0.094
JOURNAL OF FUNCTIONAL FOODS	1	0.094
JOURNAL OF HAZARDOUS MATERIALS	1	0.094
JOURNAL OF INVESTIGATIVE DERMATOLOGY	1	0.094
JOURNAL OF LEUKOCYTE BIOLOGY	1	0.094
JOURNAL OF MOLECULAR AND CELLULAR CARDIOLOGY	1	0.094
JOURNAL OF MOLECULAR MEDICINE JMM	1	0.094
JOURNAL OF NEUROIMMUNE PHARMACOLOGY	1	0.094
JOURNAL OF NEUROINFLAMMATION	1	0.094
JOURNAL OF NEUROTRAUMA	1	0.094
JOURNAL OF PATHOLOGY	1	0.094
JOURNAL OF PEDIATRIC HEMATOLOGY ONCOLOGY	1	0.094
JOURNAL OF PHARMACEUTICAL SCIENCES	1	0.094
JOURNAL OF PHARMACOLOGY AND EXPERIMENTAL THERAPEUTICS	1	0.094
JOURNAL OF PHYSIOLOGICAL SCIENCES	1	0.094
JOURNAL OF PHYSIOLOGY LONDON	1	0.094
JOURNAL OF THE AMERICAN COLLEGE OF CARDIOLOGY	1	0.094
JOURNAL OF THE AMERICAN HEART ASSOCIATION	1	0.094
JOURNAL OF THE AMERICAN SOCIETY OF NEPHROLOGY	1	0.094
JOURNAL OF TOXICOLOGIC PATHOLOGY	1	0.094
JOURNAL OF TOXICOLOGICAL SCIENCES	1	0.094
JOURNAL OF TRANSLATIONAL MEDICINE	1	0.094
JOURNAL OF UROLOGY	1	0.094
JOURNAL OF VIROLOGY	1	0.094
JOURNALS OF GERONTOLOGY SERIES A BIOLOGICAL SCIENCES AND MEDICAL SCIENCES	1	0.094
KIDNEY INTERNATIONAL	1	0.094
LATIN AMERICAN JOURNAL OF PHARMACY	1	0.094
LEUKEMIA	1	0.094
LUNG CANCER	1	0.094
MBIO	1	0.094
MECHANISMS OF DEVELOPMENT	1	0.094
MEDIATORS OF INFLAMMATION	1	0.094
MEDICAL MOLECULAR MORPHOLOGY	1	0.094
METABOLISM CLINICAL AND EXPERIMENTAL	1	0.094
METALLOMICS	1	0.094
MICROBIAL PATHOGENESIS	1	0.094
MOLECULAR CANCER RESEARCH	1	0.094
MOLECULAR ENDOCRINOLOGY	1	0.094
MOLECULAR METABOLISM	1	0.094
MOLECULAR NEURODEGENERATION	1	0.094
MOLECULAR PHARMACOLOGY	1	0.094
MOLECULAR THERAPY METHODS CLINICAL DEVELOPMENT	1	0.094
MOLECULAR VISION	1	0.094
MSPHERE	1	0.094
NANO LETTERS	1	0.094
NANOMEDICINE	1	0.094
NATURE METABOLISM	1	0.094
NEUROBIOLOGY OF AGING	1	0.094
NEUROBIOLOGY OF STRESS	1	0.094
NEUROCHEMICAL RESEARCH	1	0.094
NEUROMOLECULAR MEDICINE	1	0.094
NEUROPHARMACOLOGY	1	0.094
NEUROREPORT	1	0.094
NEUROSCIENCE LETTERS	1	0.094
NEUROTHERAPEUTICS	1	0.094
NPJ SYSTEMS BIOLOGY AND APPLICATIONS	1	0.094
NUTRITION METABOLISM	1	0.094
ONCOGENESIS	1	0.094
ONCOIMMUNOLOGY	1	0.094
ONCOTARGETS AND THERAPY	1	0.094
ORAL DISEASES	1	0.094
OSTEOARTHRITIS AND CARTILAGE	1	0.094
PARASITOLOGY RESEARCH	1	0.094
PATHOGENS	1	0.094
PATHOLOGY	1	0.094
PATHOLOGY ONCOLOGY RESEARCH	1	0.094
PEDIATRIC TRANSPLANTATION	1	0.094
PEERJ	1	0.094
PFLUGERS ARCHIV EUROPEAN JOURNAL OF PHYSIOLOGY	1	0.094
PHARMACEUTICAL RESEARCH	1	0.094
PHYSIOLOGICAL RESEARCH	1	0.094
PHYTOMEDICINE	1	0.094
PHYTOTHERAPY RESEARCH	1	0.094
PLANT MOLECULAR BIOLOGY	1	0.094
POLISH JOURNAL OF PATHOLOGY	1	0.094
PROSTAGLANDINS LEUKOTRIENES AND ESSENTIAL FATTY ACIDS	1	0.094
PROTEIN CELL	1	0.094
PROTEOMICS	1	0.094
REPRODUCTION	1	0.094
REPRODUCTIVE BIOLOGY AND ENDOCRINOLOGY	1	0.094
RSC ADVANCES	1	0.094
SCIENCE BULLETIN	1	0.094
SCIENCE PROGRESS	1	0.094
SEMINARS IN DIAGNOSTIC PATHOLOGY	1	0.094
SIGNAL TRANSDUCTION AND TARGETED THERAPY	1	0.094
SKELETAL MUSCLE	1	0.094
STEM CELLS AND DEVELOPMENT	1	0.094
TARGETING THE LYSOSOME	1	0.094
TOXICOLOGICAL RESEARCH	1	0.094
TOXICOLOGICAL SCIENCES	1	0.094
TOXICOLOGY IN VITRO	1	0.094
TRAFFIC	1	0.094
TRANSLATIONAL NEUROSCIENCE	1	0.094
UROLOGY	1	0.094
VETERINARY MICROBIOLOGY	1	0.094
VIROLOGY	1	0.094
VIRULENCE	1	0.094

## Sheet: countries
countries/regions	count	% of 1,059
USA	487	45.987
PEOPLES R CHINA	353	33.333
ITALY	128	12.087
JAPAN	64	6.043
CANADA	61	5.76
GERMANY	58	5.477
FRANCE	57	5.382
ENGLAND	53	5.005
SOUTH KOREA	52	4.91
SPAIN	27	2.55
AUSTRALIA	25	2.361
SWEDEN	22	2.077
INDIA	21	1.983
NETHERLANDS	19	1.794
SWITZERLAND	18	1.7
SINGAPORE	16	1.511
CZECH REPUBLIC	15	1.416
AUSTRIA	10	0.944
NORWAY	10	0.944
BRAZIL	9	0.85
DENMARK	9	0.85
GREECE	8	0.755
ISRAEL	8	0.755
IRELAND	7	0.661
POLAND	7	0.661
SCOTLAND	7	0.661
TAIWAN	7	0.661
BELGIUM	5	0.472
ICELAND	5	0.472
SERBIA	5	0.472
CHILE	4	0.378
EGYPT	4	0.378
MEXICO	4	0.378
HUNGARY	3	0.283
IRAN	3	0.283
TURKEY	3	0.283
BULGARIA	2	0.189
LATVIA	2	0.189
NEW ZEALAND	2	0.189
PORTUGAL	2	0.189
QATAR	2	0.189
SOUTH AFRICA	2	0.189
THAILAND	2	0.189
WALES	2	0.189
ARGENTINA	1	0.094
CROATIA	1	0.094
FINLAND	1	0.094
GHANA	1	0.094
INDONESIA	1	0.094
NEPAL	1	0.094
NORTH IRELAND	1	0.094
PERU	1	0.094
ROMANIA	1	0.094
RUSSIA	1	0.094
SAUDI ARABIA	1	0.094

## Sheet: institutes
institutes	count	% of 1,059
BAYLOR COLLEGE OF MEDICINE	70	6.61
FONDAZIONE TELETHON	69	6.516
UNIVERSITY OF NAPLES FEDERICO II	58	5.477
NATIONAL INSTITUTES OF HEALTH NIH USA	54	5.099
HARVARD UNIVERSITY	45	4.249
INSTITUT NATIONAL DE LA SANTE ET DE LA RECHERCHE MEDICALE INSERM	38	3.588
UNIVERSITY OF CALIFORNIA SYSTEM	38	3.588
JOHNS HOPKINS UNIVERSITY	36	3.399
UNIVERSITY OF TEXAS SYSTEM	36	3.399
CHINESE ACADEMY OF SCIENCES	30	2.833
UNIVERSITY OF MICHIGAN	28	2.644
UNIVERSITY OF MICHIGAN SYSTEM	28	2.644
WASHINGTON UNIVERSITY WUSTL	28	2.644
ZHEJIANG UNIVERSITY	24	2.266
UNIVERSITY OF TORONTO	23	2.172
CENTRE NATIONAL DE LA RECHERCHE SCIENTIFIQUE CNRS	21	1.983
INDIANA UNIVERSITY SYSTEM	21	1.983
SOOCHOW UNIVERSITY CHINA	21	1.983
HOWARD HUGHES MEDICAL INSTITUTE	20	1.889
JOHNS HOPKINS MEDICINE	20	1.889
SICHUAN UNIVERSITY	20	1.889
FUDAN UNIVERSITY	19	1.794
PENNSYLVANIA COMMONWEALTH SYSTEM OF HIGHER EDUCATION PCSHE	19	1.794
ASSISTANCE PUBLIQUE HOPITAUX PARIS APHP	18	1.7
INDIANA UNIVERSITY BLOOMINGTON	18	1.7
NIH NATIONAL HEART LUNG BLOOD INSTITUTE NHLBI	18	1.7
UNIVERSITE DE PARIS	18	1.7
HARVARD MEDICAL SCHOOL	17	1.605
MASSACHUSETTS GENERAL HOSPITAL	17	1.605
MEMORIAL SLOAN KETTERING CANCER CENTER	17	1.605
SHANGHAI JIAO TONG UNIVERSITY	17	1.605
UNICANCER	17	1.605
UNIVERSITY OF LONDON	17	1.605
SORBONNE UNIVERSITE	16	1.511
TEXAS CHILDREN HOSP	16	1.511
UTMD ANDERSON CANCER CENTER	16	1.511
CNRS NATIONAL INSTITUTE FOR BIOLOGY INSB	15	1.416
HUAZHONG UNIVERSITY OF SCIENCE TECHNOLOGY	15	1.416
KAROLINSKA INSTITUTET	15	1.416
SOUTHERN MEDICAL UNIVERSITY CHINA	15	1.416
US DEPARTMENT OF VETERANS AFFAIRS	15	1.416
VETERANS HEALTH ADMINISTRATION VHA	15	1.416
YALE UNIVERSITY	15	1.416
NATIONAL UNIVERSITY OF SINGAPORE	14	1.322
SHANDONG UNIVERSITY	14	1.322
UNIVERSITY COLLEGE LONDON	14	1.322
UNIVERSITY OF MACAU	14	1.322
MASSACHUSETTS INSTITUTE OF TECHNOLOGY MIT	13	1.228
RUTGERS STATE UNIVERSITY NEW BRUNSWICK	13	1.228
SUN YAT SEN UNIVERSITY	13	1.228
UNIVERSITY OF PITTSBURGH	13	1.228
CHARLES UNIVERSITY PRAGUE	12	1.133
GUANGZHOU UNIVERSITY OF CHINESE MEDICINE	12	1.133
HELMHOLTZ ASSOCIATION	12	1.133
UNIVERSITY OF CALIFORNIA SAN DIEGO	12	1.133
UNIVERSITY OF CHINESE ACADEMY OF SCIENCES CAS	12	1.133
UNIVERSITY OF ULSAN	12	1.133
WENZHOU MEDICAL UNIVERSITY	12	1.133
AIR FORCE MILITARY MEDICAL UNIVERSITY	11	1.039
CHINESE ACADEMY OF MEDICAL SCIENCES PEKING UNION MEDICAL COLLEGE	11	1.039
NANJING UNIVERSITY	11	1.039
NIH NATIONAL CANCER INSTITUTE NCI	11	1.039
UNIVERSITY OF CALIFORNIA LOS ANGELES	11	1.039
UNIVERSITY OF PADUA	11	1.039
UNIVERSITY OF PENNSYLVANIA	11	1.039
UNIVERSITY OF TEXAS SOUTHWESTERN MEDICAL CENTER DALLAS	11	1.039
UNIVERSITY OF VERONA	11	1.039
UNIVERSITY OF WASHINGTON	11	1.039
HONG KONG BAPTIST UNIVERSITY	10	0.944
MAYO CLINIC	10	0.944
MCGILL UNIVERSITY	10	0.944
RICE UNIVERSITY	10	0.944
RUTGERS STATE UNIVERSITY MEDICAL CENTER	10	0.944
SEOUL NATIONAL UNIVERSITY SNU	10	0.944
UNIVERSITY OF KANSAS	10	0.944
UNIVERSITY OF WASHINGTON SEATTLE	10	0.944
UNIVERSITY SYSTEM OF MARYLAND	10	0.944
YONSEI UNIVERSITY	10	0.944
ARMY MEDICAL UNIVERSITY	9	0.85
BOSTON CHILDREN S HOSPITAL	9	0.85
BRIGHAM WOMEN S HOSPITAL	9	0.85
CONSIGLIO NAZIONALE DELLE RICERCHE CNR	9	0.85
DANA FARBER CANCER INSTITUTE	9	0.85
MAX PLANCK SOCIETY	9	0.85
OSAKA UNIVERSITY	9	0.85
SHANGHAI INSTITUTES FOR BIOLOGICAL SCIENCES CAS	9	0.85
UNIVERSITY OF CALIFORNIA SAN FRANCISCO	9	0.85
UNIVERSITY OF KANSAS MEDICAL CENTER	9	0.85
UNIVERSITY OF ZURICH	9	0.85
CENTRAL SOUTH UNIVERSITY	8	0.755
CHINA MEDICAL UNIVERSITY	8	0.755
CHUNGNAM NATIONAL UNIVERSITY	8	0.755
EMORY UNIVERSITY	8	0.755
GERMAN CANCER RESEARCH CENTER DKFZ	8	0.755
GUSTAVE ROUSSY	8	0.755
HOPITAL UNIVERSITAIRE EUROPEEN GEORGES POMPIDOU APHP	8	0.755
JOHN COCHRAN VA MED CTR	8	0.755
PEKING UNIVERSITY	8	0.755
PSL RESEARCH UNIVERSITY PARIS	8	0.755
RUPRECHT KARLS UNIVERSITY HEIDELBERG	8	0.755
STANFORD UNIVERSITY	8	0.755
UNIVERSITY OF BRITISH COLUMBIA	8	0.755
UNIVERSITY OF MASSACHUSETTS SYSTEM	8	0.755
UNIVERSITY OF MASSACHUSETTS WORCESTER	8	0.755
UNIVERSITY OF NEBRASKA SYSTEM	8	0.755
UNIVERSITY OF NEW MEXICO	8	0.755
UNIVERSITY OF OSLO	8	0.755
UNIVERSITY OF OXFORD	8	0.755
UNIVERSITY OF PERUGIA	8	0.755
UNIVERSITY OF TOKYO	8	0.755
YONSEI UNIVERSITY HEALTH SYSTEM	8	0.755
CHONGQING MEDICAL UNIVERSITY	7	0.661
CONSEJO SUPERIOR DE INVESTIGACIONES CIENTIFICAS CSIC	7	0.661
GUANGZHOU MEDICAL UNIVERSITY	7	0.661
HOSPITAL FOR SICK CHILDREN SICKKIDS	7	0.661
INSTITUT CURIE	7	0.661
MARCHE POLYTECHNIC UNIVERSITY	7	0.661
NEWCASTLE UNIVERSITY UK	7	0.661
NIH NATIONAL INSTITUTE OF ALLERGY INFECTIOUS DISEASES NIAID	7	0.661
PEDERZOLI HOSP	7	0.661
SCRIPPS RESEARCH INSTITUTE	7	0.661
SHANDONG FIRST MEDICAL UNIVERSITY SHANDONG ACADEMY OF MEDICAL SCIENCES	7	0.661
STATE UNIVERSITY SYSTEM OF FLORIDA	7	0.661
TONGJI UNIVERSITY	7	0.661
UNIVERSITE PARIS SACLAY	7	0.661
UNIVERSITY OF ILLINOIS SYSTEM	7	0.661
UNIVERSITY OF MARYLAND BALTIMORE	7	0.661
UNIVERSITY OF MILAN	7	0.661
UNIVERSITY OF NEBRASKA MEDICAL CENTER	7	0.661
VANDERBILT UNIVERSITY	7	0.661
YESHIVA UNIVERSITY	7	0.661
ZHEJIANG PROV KEY LAB ORTHOPAED	7	0.661
ALBERT EINSTEIN COLLEGE OF MEDICINE	6	0.567
BROAD INSTITUTE	6	0.567
CHINESE UNIVERSITY OF HONG KONG	6	0.567
CIBER CENTRO DE INVESTIGACION BIOMEDICA EN RED	6	0.567
CINCINNATI CHILDREN S HOSPITAL MEDICAL CENTER	6	0.567
CORNELL UNIVERSITY	6	0.567
DALHOUSIE UNIVERSITY	6	0.567
DEMOCRITUS UNIVERSITY OF THRACE	6	0.567
GUANGXI MEDICAL UNIVERSITY	6	0.567
GUILIN MEDICAL UNIVERSITY	6	0.567
HANGZHOU MEDICAL COLLEGE	6	0.567
HARBIN MEDICAL UNIVERSITY	6	0.567
HENRY FORD HOSPITAL	6	0.567
INSTITUTE OF BIOPHYSICS CAS	6	0.567
JINAN UNIVERSITY	6	0.567
LUND UNIVERSITY	6	0.567
MONASH UNIVERSITY	6	0.567
NANJING MEDICAL UNIVERSITY	6	0.567
PEKING UNION MEDICAL COLLEGE	6	0.567
UNIVERSITY HEALTH NETWORK TORONTO	6	0.567
UNIVERSITY OF CINCINNATI	6	0.567
UNIVERSITY OF COLORADO SYSTEM	6	0.567
UNIVERSITY OF ILLINOIS URBANA CHAMPAIGN	6	0.567
UNIVERSITY OF SYDNEY	6	0.567
UNIVERSITY OF UDINE	6	0.567
UTRECHT UNIVERSITY	6	0.567
VITA SALUTE SAN RAFFAELE UNIVERSITY	6	0.567
WAYNE STATE UNIVERSITY	6	0.567
YORK UNIVERSITY CANADA	6	0.567
ZHEJIANG PROVINCIAL PEOPLE S HOSPITAL	6	0.567
ANHUI MEDICAL UNIVERSITY	5	0.472
BEIJING UNIVERSITY OF CHINESE MEDICINE	5	0.472
BIOTECHMED GRAZ	5	0.472
CAPITAL MEDICAL UNIVERSITY	5	0.472
CLEVELAND CLINIC FOUNDATION	5	0.472
EWHA WOMANS UNIVERSITY	5	0.472
FRANCIS CRICK INSTITUTE	5	0.472
GOETHE UNIVERSITY FRANKFURT	5	0.472
HONG KONG POLYTECHNIC UNIVERSITY	5	0.472
ICAHN SCHOOL OF MEDICINE AT MOUNT SINAI	5	0.472
INDIANA UNIVERSITY PURDUE UNIVERSITY INDIANAPOLIS	5	0.472
IRCCS NEUROMED	5	0.472
JEONBUK NATIONAL UNIVERSITY	5	0.472
JILIN UNIVERSITY	5	0.472
JOHNS HOPKINS BLOOMBERG SCHOOL OF PUBLIC HEALTH	5	0.472
KAROLINSKA UNIVERSITY HOSPITAL	5	0.472
KING S COLLEGE LONDON	5	0.472
KOREA BASIC SCIENCE INSTITUTE KBSI	5	0.472
KOREA RESEARCH INSTITUTE OF BIOSCIENCE BIOTECHNOLOGY KRIBB	5	0.472
NAGOYA UNIVERSITY	5	0.472
POLISH ACADEMY OF SCIENCES	5	0.472
RUSH UNIVERSITY	5	0.472
SAINT MICHAELS HOSPITAL TORONTO	5	0.472
SAPIENZA UNIVERSITY ROME	5	0.472
TECHNION ISRAEL INSTITUTE OF TECHNOLOGY	5	0.472
UNIVERSITE DE MONTREAL	5	0.472
UNIVERSITY OF ALABAMA BIRMINGHAM	5	0.472
UNIVERSITY OF ALABAMA SYSTEM	5	0.472
UNIVERSITY OF AMSTERDAM	5	0.472
UNIVERSITY OF BONN	5	0.472
UNIVERSITY OF CHICAGO	5	0.472
UNIVERSITY OF COPENHAGEN	5	0.472
UNIVERSITY OF DUISBURG ESSEN	5	0.472
UNIVERSITY OF GRONINGEN	5	0.472
UNIVERSITY OF ICELAND	5	0.472
UNIVERSITY OF IOWA	5	0.472
UNIVERSITY OF MELBOURNE	5	0.472
UNIVERSITY OF SCIENCE TECHNOLOGY OF CHINA CAS	5	0.472
UNIVERSITY OF SOUTH CAROLINA COLUMBIA	5	0.472
UNIVERSITY OF SOUTH CAROLINA SYSTEM	5	0.472
UNIVERSITY OF TEXAS HEALTH SAN ANTONIO	5	0.472
UNIVERSITY OF TEXAS HEALTH SCIENCE CENTER HOUSTON	5	0.472
UNIVERSITY SYSTEM OF GEORGIA	5	0.472
UTRECHT UNIVERSITY MEDICAL CENTER	5	0.472
VENETO INSTITUTE MOLECULAR MEDICINE	5	0.472
VIRGINIA COMMONWEALTH UNIVERSITY	5	0.472
WUHAN UNIVERSITY	5	0.472
YANTAI UNIVERSITY	5	0.472
ACADEMIC MEDICAL CENTER AMSTERDAM	4	0.378
AIX MARSEILLE UNIVERSITE	4	0.378
ASAN MEDICAL CENTER	4	0.378
BROWN UNIVERSITY	4	0.378
BUCK INSTITUTE FOR RESEARCH ON AGING	4	0.378
CEDARS SINAI MEDICAL CENTER	4	0.378
CHINA PHARMACEUTICAL UNIVERSITY	4	0.378
CHONNAM NATIONAL UNIVERSITY	4	0.378
COLUMBIA UNIVERSITY	4	0.378
DANISH CANCER SOCIETY	4	0.378
DAVID GEFFEN SCHOOL OF MEDICINE AT UCLA	4	0.378
DUKE UNIVERSITY	4	0.378
EGYPTIAN KNOWLEDGE BANK EKB	4	0.378
FRED HUTCHINSON CANCER CENTER	4	0.378
FREE UNIVERSITY OF BERLIN	4	0.378
GIFU PHARMACEUTICAL UNIVERSITY	4	0.378
GUANGDONG MEDICAL UNIVERSITY	4	0.378
GYEONGSANG NATIONAL UNIVERSITY	4	0.378
HARVARD T H CHAN SCHOOL OF PUBLIC HEALTH	4	0.378
HOPITAL UNIVERSITAIRE BICETRE APHP	4	0.378
HOPITAL UNIVERSITAIRE COCHIN APHP	4	0.378
HOPITAL UNIVERSITAIRE PITIE SALPETRIERE APHP	4	0.378
IFOM FIRC INSTITUTE OF MOLECULAR ONCOLOGY	4	0.378
IRCCS EUROPEAN INSTITUTE OF ONCOLOGY IEO	4	0.378
JESSE BROWN VA MEDICAL CENTER	4	0.378
JUNTENDO UNIVERSITY	4	0.378
KOLLING INSTITUTE OF MEDICAL RESEARCH	4	0.378
KUNMING MEDICAL UNIVERSITY	4	0.378
LUNENFELD TANENBAUM RESEARCH INSTITUTE	4	0.378
NANCHANG UNIVERSITY	4	0.378
NANYANG TECHNOLOGICAL UNIVERSITY	4	0.378
NANYANG TECHNOLOGICAL UNIVERSITY NATIONAL INSTITUTE OF EDUCATION NIE SINGAPORE	4	0.378
NIH EUNICE KENNEDY SHRIVER NATIONAL INSTITUTE OF CHILD HEALTH HUMAN DEVELOPMENT NICHD	4	0.378
NIH NATIONAL INSTITUTE OF ARTHRITIS MUSCULOSKELETAL SKIN DISEASES NIAMS	4	0.378
NIH NATIONAL INSTITUTE OF NEUROLOGICAL DISORDERS STROKE NINDS	4	0.378
PENNSYLVANIA STATE UNIVERSITY	4	0.378
QINGDAO UNIVERSITY	4	0.378
RADY CHILDRENS HOSPITAL SAN DIEGO	4	0.378
ROSWELL PARK CANCER INSTITUTE	4	0.378
SALK INSTITUTE	4	0.378
SHENZHEN UNIVERSITY	4	0.378
SINAI HEALTH SYSTEM TORONTO	4	0.378
SOUTH CHINA UNIVERSITY OF TECHNOLOGY	4	0.378
STATE KEY LAB ONCOLOGY SOUTH CHINA	4	0.378
STATE UNIVERSITY OF NEW YORK SUNY SYSTEM	4	0.378
TECHNICAL UNIVERSITY OF MUNICH	4	0.378
TECHNISCHE UNIVERSITAT DRESDEN	4	0.378
TIANJIN MEDICAL UNIVERSITY	4	0.378
TSINGHUA UNIVERSITY	4	0.378
UNIV HOSP	4	0.378
UNIVERSITA DI MODENA E REGGIO EMILIA	4	0.378
UNIVERSITE COTE D AZUR	4	0.378
UNIVERSITE DE TOULOUSE	4	0.378
UNIVERSITY OF BIRMINGHAM	4	0.378
UNIVERSITY OF CALIFORNIA BERKELEY	4	0.378
UNIVERSITY OF CAMBRIDGE	4	0.378
UNIVERSITY OF COLOGNE	4	0.378
UNIVERSITY OF COLORADO ANSCHUTZ MEDICAL CAMPUS	4	0.378
UNIVERSITY OF EDINBURGH	4	0.378
UNIVERSITY OF HOUSTON	4	0.378
UNIVERSITY OF HOUSTON SYSTEM	4	0.378
UNIVERSITY OF MINNESOTA SYSTEM	4	0.378
UNIVERSITY OF MINNESOTA TWIN CITIES	4	0.378
UNIVERSITY OF MUNICH	4	0.378
UNIVERSITY OF NORTH CAROLINA	4	0.378
UNIVERSITY OF NORTH CAROLINA CHAPEL HILL	4	0.378
UNIVERSITY OF ROCHESTER	4	0.378
UNIVERSITY OF SEVILLA	4	0.378
UNIVERSITY OF SOUTHERN CALIFORNIA	4	0.378
UNIVERSITY OF TENNESSEE HEALTH SCIENCE CENTER	4	0.378
UNIVERSITY OF TENNESSEE SYSTEM	4	0.378
UNIVERSITY OF WISCONSIN MADISON	4	0.378
UNIVERSITY OF WISCONSIN SYSTEM	4	0.378
VIRGEN DEL ROCIO UNIVERSITY HOSPITAL	4	0.378
XIAMEN UNIVERSITY	4	0.378
ZHEJIANG UNIVERSITY OF TECHNOLOGY	4	0.378
ZHENGZHOU UNIVERSITY	4	0.378
ACADEMIA SINICA TAIWAN	3	0.283
AUGUSTA UNIVERSITY	3	0.283
AUTONOMOUS UNIVERSITY OF BARCELONA	3	0.283
BEIJING NORMAL UNIVERSITY	3	0.283
CATHOLIC UNIVERSITY OF KOREA	3	0.283
CENTRAL MICHIGAN UNIVERSITY	3	0.283
CHARITE UNIVERSITATSMEDIZIN BERLIN	3	0.283
CHINESE ORTHOPAED REGENERAT MED SOC	3	0.283
CIBERER	3	0.283
COUNCIL OF SCIENTIFIC INDUSTRIAL RESEARCH CSIR INDIA	3	0.283
CSIC JA USE INSTITUTO DE BIOMEDICINA DE SEVILLA IBIS	3	0.283
EUROPEAN MOLECULAR BIOLOGY LABORATORY EMBL	3	0.283
FLORIDA ATLANTIC UNIVERSITY	3	0.283
FUJIAN MEDICAL UNIVERSITY	3	0.283
GUANGDONG ACADEMY OF MEDICAL SCIENCES GUANGDONG GENERAL HOSPITAL	3	0.283
GWANGJU INSTITUTE OF SCIENCE TECHNOLOGY GIST	3	0.283
HOPITAL UNIVERSITAIRE ARMAND TROUSSEAU APHP	3	0.283
HOSPITAL CLINIC DE BARCELONA	3	0.283
HOSPITAL FOCH	3	0.283
HOSPITAL SPEDALI CIVILI BRESCIA	3	0.283
HOSPITAL UNIVERSITARIO CRUCES	3	0.283
HUMBOLDT UNIVERSITY OF BERLIN	3	0.283
IMPERIAL COLLEGE LONDON	3	0.283
INDIAN INSTITUTE OF SCIENCE IISC BANGALORE	3	0.283
INSTITUTE OF BIOCHEMISTRY BIOPHYSICS POLISH ACADEMY OF SCIENCES	3	0.283
INSTITUTE OF MEDICINAL BIOTECHNOLOGY CAMS	3	0.283
IRCCS BAMBINO GESU	3	0.283
IRCCS OSPEDALE SAN RAFFAELE	3	0.283
JEFFERSON UNIVERSITY	3	0.283
JOHN COCHRAN VET AFFAIRS MED CTR	3	0.283
KOCHI RED CROSS HOSP	3	0.283
KOREA CENTERS FOR DISEASE CONTROL PREVENTION KCDC	3	0.283
KOREA NATIONAL INSTITUTE OF HEALTH KNIH	3	0.283
KYOTO UNIVERSITY	3	0.283
KYUNG HEE UNIVERSITY	3	0.283
LAVAL UNIVERSITY	3	0.283
LE RESEAU INTERNATIONAL DES INSTITUTS PASTEUR RIIP	3	0.283
LEIDEN UNIVERSITY	3	0.283
LI KA SHING KNOWLEDGE INSTITUTE	3	0.283
MCMASTER UNIVERSITY	3	0.283
MEDICAL UNIVERSITY OF GRAZ	3	0.283
MEHARRY MEDICAL COLLEGE	3	0.283
MICHIGAN CTR TRANSLAT PATHOL	3	0.283
NAGASAKI UNIVERSITY	3	0.283
NAGOYA CITY UNIVERSITY	3	0.283
NANJING UNIVERSITY OF CHINESE MEDICINE	3	0.283
NANKAI UNIVERSITY	3	0.283
NATIONAL CANCER CENTER KOREA NCC	3	0.283
NATIONAL CHENG KUNG UNIVERSITY	3	0.283
NATIONAL YANG MING CHIAO TUNG UNIVERSITY	3	0.283
NEW YORK UNIVERSITY	3	0.283
NIH NATIONAL INSTITUTE ON ALCOHOL ABUSE ALCOHOLISM NIAAA	3	0.283
OHIO STATE UNIVERSITY	3	0.283
OREGON HEALTH SCIENCE UNIVERSITY	3	0.283
PLA SECOND MILITARY MEDICAL UNIVERSITY	3	0.283
RADBOUD UNIVERSITY NIJMEGEN	3	0.283
ROYAL COLLEGE OF SURGEONS IRELAND	3	0.283
ROYAL NORTH SHORE HOSPITAL	3	0.283
RUTGERS STATE UNIVERSITY NEWARK	3	0.283
RYERSON UNIVERSITY	3	0.283
SHANGHAI INSTITUTE OF MATERIA MEDICA CAS	3	0.283
SHANGHAI UNIVERSITY OF TRADITIONAL CHINESE MEDICINE	3	0.283
SHENYANG PHARMACEUTICAL UNIVERSITY	3	0.283
SOUTHEAST UNIVERSITY CHINA	3	0.283
SOUTHWEST UNIVERSITY CHINA	3	0.283
SUNGKYUNKWAN UNIVERSITY SKKU	3	0.283
TAIPEI VETERANS GENERAL HOSPITAL	3	0.283
THE METHODIST HOSPITAL HOUSTON	3	0.283
THE METHODIST HOSPITAL SYSTEM	3	0.283
TOKYO MEDICAL DENTAL UNIVERSITY TMDU	3	0.283
TOKYO WOMEN S MEDICAL UNIVERSITY	3	0.283
UIT THE ARCTIC UNIVERSITY OF TROMSO	3	0.283
UK RESEARCH INNOVATION UKRI	3	0.283
ULM UNIVERSITY	3	0.283
UNIVERSIDAD DE CORDOBA	3	0.283
UNIVERSITA DELLA CAMPANIA VANVITELLI	3	0.283
UNIVERSITY HOSPITAL PLZEN	3	0.283
UNIVERSITY MEDICAL CENTER HAMBURG EPPENDORF	3	0.283
UNIVERSITY OF BARCELONA	3	0.283
UNIVERSITY OF BELGRADE	3	0.283
UNIVERSITY OF CALIFORNIA IRVINE	3	0.283
UNIVERSITY OF EASTERN PIEDMONT AMEDEO AVOGADRO	3	0.283
UNIVERSITY OF FLORENCE	3	0.283
UNIVERSITY OF GDANSK	3	0.283
UNIVERSITY OF GENOA	3	0.283
UNIVERSITY OF GRAZ	3	0.283
UNIVERSITY OF HAMBURG	3	0.283
UNIVERSITY OF MARYLAND COLLEGE PARK	3	0.283
UNIVERSITY OF MIAMI	3	0.283
UNIVERSITY OF NOVI SAD	3	0.283
UNIVERSITY OF SOUTH DAKOTA	3	0.283
UNIVERSITY OF TEXAS MEDICAL BRANCH GALVESTON	3	0.283
UNIVERSITY OF TRENTO	3	0.283
UNIVERSITY OF TURIN	3	0.283
UNIVERSITY OF WESTERN AUSTRALIA	3	0.283
VA NEBRASKA WESTERN IOWA HEALTH CARE SYSTEM	3	0.283
WEST CHINA HOSP	3	0.283
WHITEHEAD INSTITUTE	3	0.283
YOKOHAMA CITY UNIVERSITY	3	0.283
YUNNAN UNIVERSITY	3	0.283
AICHI CANCER CENTER	2	0.189
ARMY GEN HOSP LANZHOU	2	0.189
ASSISTANCE PUBLIQUE HOPITAUX DE MARSEILLE	2	0.189
ASTRAZENECA	2	0.189
AUSTRALIAN CATHOLIC UNIVERSITY	2	0.189
BABRAHAM INSTITUTE	2	0.189
BARBARA ANN KARMANOS CANCER INSTITUTE	2	0.189
BARCELONA INSTITUTE OF SCIENCE TECHNOLOGY	2	0.189
BEIJING INSTITUTE OF TECHNOLOGY	2	0.189
BIOMARIN PHARMACEUTICAL INC	2	0.189
BIOTECHNOLOGY AND BIOLOGICAL SCIENCES RESEARCH COUNCIL BBSRC	2	0.189
BOSTON UNIVERSITY	2	0.189
BULGARIAN ACADEMY OF SCIENCES	2	0.189
CAIRO UNIVERSITY	2	0.189
CARDIFF UNIVERSITY	2	0.189
CARNEGIE MELLON UNIVERSITY	2	0.189
CASE WESTERN RESERVE UNIVERSITY	2	0.189
CENTRAL UNIVERSITY OF TAMIL NADU	2	0.189
CHENGDU MEDICAL COLLEGE	2	0.189
CHENGDU UNIVERSITY OF TRADITIONAL CHINESE MEDICINE	2	0.189
CHILDREN S HOSPITAL LOS ANGELES	2	0.189
CHILDRENS HOSPITAL OF PHILADELPHIA	2	0.189
CHINA ACADEMY OF CHINESE MEDICAL SCIENCES	2	0.189
CHINA AGRICULTURAL UNIVERSITY	2	0.189
CHINA JAPAN FRIENDSHIP HOSPITAL	2	0.189
CHINA MEDICAL UNIVERSITY HOSPITAL TAIWAN	2	0.189
CHINA MEDICAL UNIVERSITY TAIWAN	2	0.189
CHINESE ACADEMY OF FISHERY SCIENCES	2	0.189
CHONGQING UNIVERSITY	2	0.189
CHU LILLE	2	0.189
CHU RENNES	2	0.189
CIBEREHD	2	0.189
CITY UNIVERSITY OF HONG KONG	2	0.189
CNRS INSTITUTE OF CHEMISTRY INC	2	0.189
COLLABORAT INNOVAT CTR BIOTHERAPY	2	0.189
CSIR INSTITUTE OF MICROBIAL TECHNOLOGY IMTECH	2	0.189
DALHOUSIE MED NEW BRUNSWICK	2	0.189
DALIAN MEDICAL UNIVERSITY	2	0.189
DANKOOK UNIVERSITY	2	0.189
DEPARTMENT OF BIOTECHNOLOGY DBT INDIA	2	0.189
ETH ZURICH	2	0.189
FAC MED	2	0.189
FEINBERG SCHOOL OF MEDICINE	2	0.189
FLANDERS INSTITUTE FOR BIOTECHNOLOGY VIB	2	0.189
FLORIDA INTERNATIONAL UNIVERSITY	2	0.189
FONDATION I SITE ULNE	2	0.189
FRESHWATER FISHERIES RESEARCH CENTER CAFS	2	0.189
FRIEDRICH SCHILLER UNIVERSITY OF JENA	2	0.189
GACHON UNIVERSITY	2	0.189
GEN HOSP NORTHERN THEATER	2	0.189
GERIATRIC RESEARCH EDUCATION CLINICAL CENTER	2	0.189
GLAXOSMITHKLINE	2	0.189
GUANGDONG PHARMACEUTICAL UNIVERSITY	2	0.189
HANGZHOU NORMAL UNIVERSITY	2	0.189
HANYANG UNIVERSITY	2	0.189
HARBIN UNIVERSITY OF COMMERCE	2	0.189
HEBEI MEDICAL UNIVERSITY	2	0.189
HELMHOLTZ CENTER MUNICH GERMAN RESEARCH CENTER FOR ENVIRONMENTAL HEALTH	2	0.189
HONG KONG UNIVERSITY OF SCIENCE TECHNOLOGY	2	0.189
HOPITAL PARIS SAINT JOSEPH	2	0.189
HOPITAL UNIVERSITAIRE LARIBOISIERE FERNAND WIDAL APHP	2	0.189
HOPITAL UNIVERSITAIRE TENON APHP	2	0.189
HOSPITAL SANTA MARIA DELLA MISERICORDIA	2	0.189
HOSPITAL UNIVERSITARI VALL D HEBRON	2	0.189
HUNAN NORMAL UNIVERSITY	2	0.189
ICREA	2	0.189
IDIBAPS	2	0.189
INDIAN INSTITUTE OF TECHNOLOGY SYSTEM IIT SYSTEM	2	0.189
INHA UNIVERSITY	2	0.189
INNER MONGOLIA MEDICAL UNIVERSITY	2	0.189
INSTITUT CLAUDIUS REGAUD	2	0.189
INSTITUT PASTEUR PARIS	2	0.189
INSTITUTE OF BASIC MEDICAL SCIENCES CAMS	2	0.189
INSTITUTE OF GENETICS DEVELOPMENTAL BIOLOGY CAS	2	0.189
INTERNATIONAL CENTER FOR GENETIC ENGINEERING BIOTECHNOLOGY ICGEB	2	0.189
IRCCS CA GRANDA OSPEDALE MAGGIORE POLICLINICO	2	0.189
IRCCS ISTITUTI FISIOTERAPICI OSPITALIERI IFO	2	0.189
IRCCS REGINA ELENA	2	0.189
ISLAMIC AZAD UNIVERSITY	2	0.189
ISTITUTO ITALIANO DI TECNOLOGIA IIT	2	0.189
JAPAN SCIENCE TECHNOLOGY AGENCY JST	2	0.189
JAPAN SOCIETY FOR THE PROMOTION OF SCIENCE	2	0.189
JAPANESE FOUNDATION FOR CANCER RESEARCH	2	0.189
JIKEI UNIVERSITY	2	0.189
JINING MEDICAL UNIVERSITY	2	0.189
JOHANNES KEPLER UNIVERSITY LINZ	2	0.189
KEIO UNIVERSITY	2	0.189
KEY LAB MOTOR SYST DIS RES PRECIS THERAPY ZHEJI	2	0.189
KOREA CDC CENTER FOR BIOMEDICAL SCIENCE	2	0.189
KUNMING INSTITUTE OF BOTANY CAS	2	0.189
KYUSHU UNIVERSITY	2	0.189
LAM THERAPEUT	2	0.189
LEIDEN UNIVERSITY EXCL LUMC	2	0.189
LEIPZIG UNIVERSITY	2	0.189
LOYOLA UNIVERSITY CHICAGO	2	0.189
MAASTRICHT UNIVERSITY	2	0.189
MAASTRICHT UNIVERSITY MEDICAL CENTRE MUMC	2	0.189
MACQUARIE UNIVERSITY	2	0.189
MAHARAJA SAYAJIRAO UNIVERSITY BARODA	2	0.189
MAX DELBRUCK CENTER FOR MOLECULAR MEDICINE	2	0.189
MEDICAL COLLEGE OF WISCONSIN	2	0.189
MEDICAL UNIVERSITY OF INNSBRUCK	2	0.189
MEDICAL UNIVERSITY OF SOUTH CAROLINA	2	0.189
MIYAZAKI PREFECTURAL NOBEOKA HOSP	2	0.189
NATIONAL CENTER FOR GLOBAL HEALTH MEDICINE JAPAN	2	0.189
NATIONAL TAIWAN UNIVERSITY	2	0.189
NENCKI INSTITUTE OF EXPERIMENTAL BIOLOGY OF THE POLISH ACADEMY OF SCIENCES	2	0.189
NIH NATIONAL CENTER FOR ADVANCING TRANSLATIONAL SCIENCES NCATS	2	0.189
NIH NATIONAL INSTITUTE OF DENTAL CRANIOFACIAL RESEARCH NIDCR	2	0.189
NIH NATIONAL INSTITUTE ON AGING NIA	2	0.189
NORTHWESTERN UNIVERSITY	2	0.189
NOVARTIS	2	0.189
OSAKA MEDICAL COLLEGE	2	0.189
PALACKY UNIVERSITY OLOMOUC	2	0.189
PALO ALTO VET ADM HEALTHCARE SYST	2	0.189
PENN STATE HEALTH	2	0.189
PENNSYLVANIA STATE UNIVERSITY UNIVERSITY PARK	2	0.189
PETER MUNK CARDIAC CENTRE	2	0.189
PONTIFICIA UNIVERSIDAD CATOLICA DE CHILE	2	0.189
RAMBAM HEALTH CARE CAMPUS	2	0.189
RAPPAPORT FACULTY OF MEDICINE	2	0.189
RIGSHOSPITALET	2	0.189
ROCHE HOLDING	2	0.189
RUTGERS CANCER INSTITUTE OF NEW JERSEY	2	0.189
SAMSUNG MEDICAL CENTER	2	0.189
SEOUL NATIONAL UNIVERSITY HOSPITAL	2	0.189
SHANDONG NORMAL UNIVERSITY	2	0.189
SOUTH AUSTRALIAN HEALTH MEDICAL RESEARCH INSTITUTE SAHMRI	2	0.189
SOUTHERN UNIVERSITY OF SCIENCE TECHNOLOGY	2	0.189
ST JUDE CHILDREN S RESEARCH HOSPITAL	2	0.189
STATE KEY LABORATORY OF RESPIRATORY DISEASE	2	0.189
STATE UNIVERSITY OF NEW YORK SUNY DOWNSTATE MEDICAL CENTER	2	0.189
SUZHOU VOCAT HLTH COLL	2	0.189
TAIPEI MEDICAL UNIVERSITY	2	0.189
TANTA UNIVERSITY	2	0.189
TECHNICAL UNIVERSITY OF DENMARK	2	0.189
TEHRAN UNIVERSITY OF MEDICAL SCIENCES	2	0.189
TEMPLE UNIVERSITY	2	0.189
TIANJIN UNIVERSITY SCIENCE TECHNOLOGY	2	0.189
TOHOKU UNIVERSITY	2	0.189
TOKYO METROPOLITAN INSTITUTE OF MEDICAL SCIENCE	2	0.189
TORONTO GENERAL HOSPITAL	2	0.189
UCSF HELEN DILLER FAMILY COMPREHENSIVE CANCER CENTER	2	0.189
UCSF MEDICAL CENTER	2	0.189
ULSAN UNIVERSITY HOSPITAL	2	0.189
UNIV GEN HOSP ALEXANDROUPOLIS	2	0.189
UNIVERSIDAD DE CHILE	2	0.189
UNIVERSIDAD MAYOR	2	0.189
UNIVERSIDAD NACIONAL AUTONOMA DE MEXICO	2	0.189
UNIVERSIDADE DE COIMBRA	2	0.189
UNIVERSIDADE FEDERAL DE SAO PAULO UNIFESP	2	0.189
UNIVERSIDADE FEDERAL DO RIO DE JANEIRO	2	0.189
UNIVERSITAT DE LLEIDA	2	0.189
UNIVERSITE DE BORDEAUX	2	0.189
UNIVERSITE DE STRASBOURG	2	0.189
UNIVERSITES DE STRASBOURG ETABLISSEMENTS ASSOCIES	2	0.189
UNIVERSITY CHILDREN S HOSPITAL ZURICH	2	0.189
UNIVERSITY COLLEGE CORK	2	0.189
UNIVERSITY HOSPITAL OF BERN	2	0.189
UNIVERSITY OF ALBERTA	2	0.189
UNIVERSITY OF BASQUE COUNTRY	2	0.189
UNIVERSITY OF BERN	2	0.189
UNIVERSITY OF BRESCIA	2	0.189
UNIVERSITY OF CALGARY	2	0.189
UNIVERSITY OF CALIFORNIA DAVIS	2	0.189
UNIVERSITY OF CAPE TOWN	2	0.189
UNIVERSITY OF CHICAGO MEDICAL CENTER	2	0.189
UNIVERSITY OF COLORADO DENVER	2	0.189
UNIVERSITY OF CONNECTICUT	2	0.189
UNIVERSITY OF CRETE	2	0.189
UNIVERSITY OF DUNDEE	2	0.189
UNIVERSITY OF ERLANGEN NUREMBERG	2	0.189
UNIVERSITY OF FERRARA	2	0.189
UNIVERSITY OF FREIBURG	2	0.189
UNIVERSITY OF HONG KONG	2	0.189
UNIVERSITY OF KAISERSLAUTERN	2	0.189
UNIVERSITY OF KENTUCKY	2	0.189
UNIVERSITY OF LOUISVILLE	2	0.189
UNIVERSITY OF MUNSTER	2	0.189
UNIVERSITY OF NOTTINGHAM	2	0.189
UNIVERSITY OF OKLAHOMA HEALTH SCIENCES CENTER	2	0.189
UNIVERSITY OF OKLAHOMA SYSTEM	2	0.189
UNIVERSITY OF OTTAWA	2	0.189
UNIVERSITY OF OTTAWA HEART INSTITUTE	2	0.189
UNIVERSITY OF QUEENSLAND	2	0.189
UNIVERSITY OF ROME TOR VERGATA	2	0.189
UNIVERSITY OF SALAMANCA	2	0.189
UNIVERSITY OF SALERNO	2	0.189
UNIVERSITY OF SEOUL	2	0.189
UNIVERSITY OF SOUTH CHINA	2	0.189
UNIVERSITY OF SOUTH FLORIDA	2	0.189
UNIVERSITY OF SOUTHAMPTON	2	0.189
UNIVERSITY OF TRIESTE	2	0.189
UNIVERSITY OF TSUKUBA	2	0.189
UNIVERSITY OF VIRGINIA	2	0.189
UNIVERSITY OF WEST FLORIDA	2	0.189
UNIVERSITY OF WURZBURG	2	0.189
UNIVERSITY OF WYOMING	2	0.189
VA CONNECTICUT HEALTHCARE SYSTEM	2	0.189
VALL D HEBRON INSTITUT DE RECERCA VHIR	2	0.189
VAN ANDEL INSTITUTE	2	0.189
VRIJE UNIVERSITEIT AMSTERDAM	2	0.189
WOMEN INFANTS HOSPITAL RHODE ISLAND	2	0.189
WONKWANG UNIVERSITY	2	0.189
XI AN JIAOTONG UNIVERSITY	2	0.189
XI AN MEDICAL UNIVERSITY	2	0.189
XINJIANG MEDICAL UNIVERSITY	2	0.189
ZUNYI MEDICAL UNIVERSITY	2	0.189
4DX LTD	1	0.094
ADDENBROOKE S HOSPITAL	1	0.094
ADEL INC	1	0.094
AHRAM CANADIAN UNIV	1	0.094
AICHI GAKUIN UNIVERSITY	1	0.094
AIN SHAMS UNIVERSITY	1	0.094
AIR FORCE MIL MED UNIV	1	0.094
AIR FORCE MLITTARY MED UNIV	1	0.094
AJOU UNIVERSITY	1	0.094
ALBANY COLLEGE OF PHARMACY HEALTH SCIENCES	1	0.094
ALECTOR	1	0.094
ALFONSO X UNIV	1	0.094
ALL INDIA INSTITUTE OF MEDICAL SCIENCES AIIMS NEW DELHI	1	0.094
ALZECURE FDN	1	0.094
AMSTERDAM UNIV MED CTR	1	0.094
ANHUI JIANZHU UNIVERSITY	1	0.094
ANKARA TRAINING RESEARCH HOSPITAL	1	0.094
ANN ROBERT H LURIE CHILDREN S HOSPITAL OF CHICAGO	1	0.094
ANTALYA BILIM UNIVERSITY	1	0.094
ARIZONA STATE UNIVERSITY	1	0.094
ASSOC RECH THERAPEUT INNOVANTES CANCEROL	1	0.094
ASTA MEDICA AG	1	0.094
AUDIE L MURPHY MEMORIAL VETERANS HOSPITAL	1	0.094
AUSTRALIAN REGENERATIVE MEDICINE INSTITUTE	1	0.094
AUSTRIAN DRUG SCREENING INST ADSI	1	0.094
AZIENDA OSPED UNIV	1	0.094
AZIENDA OSPEDALIERA SANT ANDREA	1	0.094
AZIENDA ROMAGNA	1	0.094
AZIENDA SANIT UNIV TRIESTE	1	0.094
BALTIMORE VA MEDICAL CENTER	1	0.094
BASQUE FOUNDATION FOR SCIENCE	1	0.094
BAYLOR COLL MED BCM	1	0.094
BC CHILDRENS HOSPITAL	1	0.094
BCM	1	0.094
BEATSON INSTITUTE	1	0.094
BEIDAIHE SANITARIUM CHINA COAL MINERS	1	0.094
BEIHANG UNIVERSITY	1	0.094
BEIJING GENOMICS INSTITUTE BGI	1	0.094
BEIJING HOSPITAL	1	0.094
BEIJING INST MICROBIOL EPIDEMIOL	1	0.094
BEIJING KEY LAB PARKINSONS DIS	1	0.094
BEIJING NEUROSURGICAL INSTITUTE	1	0.094
BEIJING UNIVERSITY OF CHEMICAL TECHNOLOGY	1	0.094
BETH ISRAEL DEACONESS MEDICAL CENTER	1	0.094
BHARATHIDASAN UNIVERSITY	1	0.094
BILL MELINDA GATES FOUNDATION	1	0.094
BINZHOU MEDICAL UNIVERSITY	1	0.094
BIOGEN	1	0.094
BIOMED GENOM CTR	1	0.094
BIRLA INSTITUTE OF TECHNOLOGY SCIENCE PILANI BITS PILANI	1	0.094
BOEHRINGER INGELHEIM	1	0.094
BOND UNIVERSITY	1	0.094
BONE RES INST	1	0.094
CALIFORNIA STATE UNIVERSITY FULLERTON	1	0.094
CALIFORNIA STATE UNIVERSITY SYSTEM	1	0.094
CAMBRIDGE BIOMED CAMPUS	1	0.094
CANC CLUSTER SALZBURG	1	0.094
CANCER INSTITUTE HOSPITAL CAMS	1	0.094
CANCERCARE MANITOBA FOUNDATION	1	0.094
CARE UC PONTIFICIA UNIV CATOLICA CHILE	1	0.094
CARL GUSTAV CARUS UNIVERSITY HOSPITAL	1	0.094
CAROLINAS HEALTHCARE SYSTEM	1	0.094
CASMA THERAPEUT	1	0.094
CASMA THERAPEUT INC	1	0.094
CDMC THEME	1	0.094
CELGENE GLOBAL HLTH	1	0.094
CELLZOME GMBH	1	0.094
CEMIN CTR EXCELLENCE INNOVAT NANOSTRUCTURED MAT	1	0.094
CENT EUROPEAN BIOSYST	1	0.094
CENT HOSP TAIAN SHANDONG PROV	1	0.094
CENT UNIV HOSP DEF UAH	1	0.094
CENTRAL ARKANSAS VETERANS HEALTHCARE SYSTEM	1	0.094
CENTRE ANTOINE LACASSAGNE	1	0.094
CENTRE DE REGULACIO GENOMICA CRG	1	0.094
CENTRE LEON BERARD	1	0.094
CENTRE OSCAR LAMBRET	1	0.094
CHANGCHUN UNIVERSITY OF CHINESE MEDICINE	1	0.094
CHANGHUA CHRISTIAN HOSPITAL	1	0.094
CHENGDU UNIVERSITY	1	0.094
CHIANG MAI UNIVERSITY	1	0.094
CHIBA UNIVERSITY	1	0.094
CHILDREN S NATIONAL HEALTH SYSTEM	1	0.094
CHILDRENS RES CTR	1	0.094
CHINA NATL RES INST FOOD FERMENTAT IND	1	0.094
CHINESE ACADEMY OF AGRICULTURAL SCIENCES	1	0.094
CHINESE MINIST EDUC	1	0.094
CHONGQING THREE GORGES MED COLL	1	0.094
CHU BORDEAUX	1	0.094
CHU DE NANTES	1	0.094
CHU DE TOULOUSE	1	0.094
CHU NICE	1	0.094
CHU STRASBOURG	1	0.094
CHUBU UNIVERSITY	1	0.094
CHUNGNAM NATIONAL UNIVERSITY HOSPITAL	1	0.094
CIBERFES	1	0.094
CIBIR CTR BIOMED RES LA RIOJA	1	0.094
CINVESTAV CENTRO DE INVESTIGACION Y DE ESTUDIOS AVANZADOS DEL INSTITUTO POLITECNICO NACIONAL	1	0.094
CIPA LAB LLC	1	0.094
CLARK UNIVERSITY	1	0.094
CLINICA ALEMANA	1	0.094
COLLABORAT INNOVAT CTR GENET DEV	1	0.094
COLORADO PATHOL CONSULTANTS	1	0.094
COLORADO STATE UNIVERSITY	1	0.094
COMPLUTENSE UNIVERSITY OF MADRID	1	0.094
CONSEJO NACIONAL DE INVESTIGACIONES CIENTIFICAS Y TECNICAS CONICET	1	0.094
CONSORZIO MARIO NEGRI SUD	1	0.094
CORDOBA MAIMONIDES INST BIOMED RES IMIBIC	1	0.094
COST ACT	1	0.094
CREDIT VALLEY HOSPITAL	1	0.094
CROWN BIOSCI INC	1	0.094
CSIC ANDALUSIAN CENTER FOR DEVELOPMENTAL BIOLOGY CABD	1	0.094
CSIC CENTRO DE INVESTIGACIONES BIOLOGICAS CIB	1	0.094
CSIC INSTITUTO DE INVESTIGACIONES BIOMEDICAS DE BARCELONA IIBB	1	0.094
CSIC INSTITUTO DE PARASITOLOGIA Y BIOMEDICINA LOPEZ NEYRA IPBLN	1	0.094
CSIR NATIONAL CHEMICAL LABORATORY NCL	1	0.094
CTR ADV NEUROTECHNOL INNOVAT APPLICAT CRANIA	1	0.094
CTR EXCELLENCE FUNCT SURFACES INTERFACES NANO D	1	0.094
CTR INFECT IMMUN INFLAMMAT	1	0.094
CTR INVEST BIOMED RIOJA CIBIR	1	0.094
CTR MED	1	0.094
CTR MOL MED CIMMBA	1	0.094
CTR MOL MED THERAPEUT	1	0.094
CUHK SHENZHEN RES INST	1	0.094
CZECH ACADEMY OF SCIENCES	1	0.094
DAEGU GYEONGBUK INSTITUTE OF SCIENCE TECHNOLOGY DGIST	1	0.094
DAEGU GYEONGBUK MED INNOVAT FDN	1	0.094
DALIAN UNIVERSITY OF TECHNOLOGY	1	0.094
DARTMOUTH COLLEGE	1	0.094
DEAKIN UNIVERSITY	1	0.094
DELTA UNIVERSITY FOR SCIENCE TECHNOLOGY	1	0.094
DEPARTMENT OF SCIENCE TECHNOLOGY INDIA	1	0.094
DEPT ANAT PATOL	1	0.094
DEPT PATHOL	1	0.094
DEPT UROL	1	0.094
DERAYA UNIVERSITY	1	0.094
DIAG PATHOL CTR	1	0.094
DIPARTIMENTO SCI FARMACOL BIOMOLECOLARI DISFEB	1	0.094
DOKUZ EYLUL UNIVERSITY	1	0.094
DONG A UNIVERSITY	1	0.094
DONGYING PEOPLES HOSP	1	0.094
DOUGLASS HANLY MOIR PATHOL	1	0.094
DREXEL UNIVERSITY	1	0.094
DULBECCO TELETHON INST TIGEM	1	0.094
EAST CHINA NORMAL UNIVERSITY	1	0.094
EASTERN VIRGINIA MEDICAL SCHOOL	1	0.094
ECOLE DES HAUTES ETUDES EN SANTE PUBLIQUE EHESP	1	0.094
ECOLE POLYTECHNIQUE FEDERALE DE LAUSANNE	1	0.094
ECOLE PRATIQUE DES HAUTES ETUDES EPHE	1	0.094
EDITH COWAN UNIVERSITY	1	0.094
EFFECTOR THERAPEUT	1	0.094
EL CAMINO HOSP	1	0.094
ENNERGI RES NONPROFIT ORG	1	0.094
EPO EXPT PHARMACOL ONCOL GMBH BERLIN BUCH	1	0.094
EQUIPE LABELLISEE LIGUE CANC	1	0.094
EUROPEAN NEUROSCI INST	1	0.094
EVOTEC SE	1	0.094
EXPERIMENTAL RESEARCH CENTER CACMS	1	0.094
EXPT CLIN RES CTR	1	0.094
FDN RES TECHNOL	1	0.094
FDN SAN CAMILLO HOSP IRCCS	1	0.094
FEDER II UNIV	1	0.094
FEDERAT MED TRANSLAT UNIV STRASBOURG	1	0.094
FIRST PEOPLES HOSP LIANYUNGANG	1	0.094
FIRST PEOPLES HOSP WU JIANG	1	0.094
FLINT ANIM CANC CTR	1	0.094
FLOREY INST NEUROSCI	1	0.094
FLOREY INSTITUTE OF NEUROSCIENCE MENTAL HEALTH	1	0.094
FML LAB	1	0.094
FONDAP GEROSCI CTR BRAIN HLTH METAB	1	0.094
FONDAZIONE IRCCS ISTITUTO NAZIONALE TUMORI MILAN	1	0.094
FOUNDATION FOR RESEARCH TECHNOLOGY HELLAS FORTH	1	0.094
FOX CHASE CANCER CENTER	1	0.094
FRAUNHOFER CLUSTER EXCELLENCE IMMUNE MEDIATED DIS	1	0.094
FRAUNHOFER INST TRANSLAT MED PHARMACOL ITMP	1	0.094
FRESENIUS KABI AUSTRIA GMBH	1	0.094
FROEDTERT HLTH MED COLL WISCONSIN	1	0.094
FU WAI HOSPITAL CAMS	1	0.094
FUDAN INST METAB DIS	1	0.094
FUKUSHIMA MEDICAL UNIVERSITY	1	0.094
FUTURE UNIVERSITY FUE	1	0.094
FUYANG FIFTH PEOPLE HOSP	1	0.094
GARVAN INSTITUTE OF MEDICAL RESEARCH	1	0.094
GEN HOSP	1	0.094
GENEDX INC	1	0.094
GENENTECH	1	0.094
GEORGIA INSTITUTE OF TECHNOLOGY	1	0.094
GERMAN CENTER FOR INFECTION RESEARCH	1	0.094
GERMAN CENTRE FOR CARDIOVASCULAR RESEARCH	1	0.094
GERMAN UNIVERSITY IN CAIRO	1	0.094
GHENT UNIVERSITY	1	0.094
GI INNOVAT	1	0.094
GIFU UNIVERSITY	1	0.094
GOETHE UNIVERSITY FRANKFURT HOSPITAL	1	0.094
GRAD SCH AGR LIFE SCI	1	0.094
GRAD SCH BIOMED SCI	1	0.094
GRAZ UNIVERSITY OF TECHNOLOGY	1	0.094
GREAT ORMOND STREET HOSPITAL FOR CHILDREN NHS FOUNDATION TRUST	1	0.094
GREIFSWALD MEDICAL SCHOOL	1	0.094
GRIFFITH UNIVERSITY	1	0.094
GUANGDONG ACADEMY OF AGRICULTURAL SCIENCES	1	0.094
GUANGDONG PROV KEY LAB ENVIRONM PROTECT RESOURC	1	0.094
GUANGRAO CTY PEOPLES HOSP	1	0.094
GUANGXI UNIVERSITY	1	0.094
GUANGXI ZHUANG AUTONOMOUS REG CTR DIS CONTROL P	1	0.094
GUANGZHOU CHINESE MED INTEGRATED HOSP HUADU	1	0.094
GUANGZHOU INSTITUTE OF BIOMEDICINE HEALTH CAS	1	0.094
GUANGZHOU INSTITUTE OF GEOCHEMISTRY CAS	1	0.094
GUIZHOU MEDICAL UNIVERSITY	1	0.094
GUNMA UNIVERSITY	1	0.094
GUY S ST THOMAS NHS FOUNDATION TRUST	1	0.094
HACKENSACK MERIDIAN HLTH	1	0.094
HALLYM UNIVERSITY	1	0.094
HAMAD MEDICAL CORPORATION	1	0.094
HAMAMATSU UNIVERSITY SCHOOL OF MEDICINE	1	0.094
HANS KNOLL INSTITUTE HKI	1	0.094
HARBIN INSTITUTE OF TECHNOLOGY	1	0.094
HARBIN MED SCH	1	0.094
HARBORVIEW MEDICAL CENTER	1	0.094
HARRISON INT PEACE HOSP	1	0.094
HARRY PERKINS INSTITUTE OF MEDICAL RESEARCH	1	0.094
HEBREW UNIVERSITY OF JERUSALEM	1	0.094
HEILONGJIANG BAYI AGRICULTURAL UNIVERSITY	1	0.094
HENAN COLL TCM	1	0.094
HENAN TCM RES ACAD	1	0.094
HENAN UNIVERSITY	1	0.094
HENAN UNIVERSITY OF TRADITIONAL CHINESE MEDICINE	1	0.094
HEZE THIRD PEOPLES HOSP	1	0.094
HIRATSUKA MUNICIPAL HOSP	1	0.094
HIROSHIMA UNIVERSITY	1	0.094
HLTH SCI RES INST GERMANS TRIAS PUJOL	1	0.094
HOKKAIDO UNIVERSITY	1	0.094
HOPITAL UNIVERSITAIRE ROBERT DEBRE APHP	1	0.094
HOPITAL UNIVERSITAIRE SAINT ANTOINE APHP	1	0.094
HOPP CHILDRENS CANC CTR HEIDELBERG KITZ	1	0.094
HOSHI UNIVERSITY	1	0.094
HOSP VALLE NALON	1	0.094
HOSPITAL DE LEON	1	0.094
HOSPITAL GERMANS TRIAS I PUJOL	1	0.094
HOSPITAL UNIVERSITARI I POLITECNIC LA FE	1	0.094
HUAZHONG AGRICULTURAL UNIVERSITY	1	0.094
HUBEI CLIN MED RES CTR HEPAT SURG	1	0.094
HUBEI PROV ACAD TRADIT CHINESE MED	1	0.094
HUBEI PROV HOSP TRADIT CHINESE MED	1	0.094
HUBEI UNIVERSITY OF SCIENCE TECHNOLOGY	1	0.094
HUBRECHT INSTITUTE KNAW	1	0.094
HUDSON INSTITUTE OF MEDICAL RESEARCH	1	0.094
HUNAN AGRICULTURAL UNIVERSITY	1	0.094
HUZHOU UNIVERSITY	1	0.094
ICSS	1	0.094
INCHEON NATIONAL UNIVERSITY	1	0.094
INDIAN INST ADV RES	1	0.094
INDIAN INSTITUTE OF TECHNOLOGY IIT INDORE	1	0.094
INDIAN INSTITUTE OF TECHNOLOGY IIT MADRAS	1	0.094
INST FISHERIES AQUACULTURE	1	0.094
INST PATHOL	1	0.094
INST RECERCA ST JOAN DE DEU IRSJD	1	0.094
INST SALUD PUBL CHILE	1	0.094
INSTITUT DE CANCEROLOGIE DE L OUEST ICO	1	0.094
INSTITUT DE CANCEROLOGIE DE LA LOIRE	1	0.094
INSTITUT DE RECERCA BIOMEDICA IRB LLEIDA	1	0.094
INSTITUT DE RECHERCHE CLINIQUE DE MONTREAL IRCM	1	0.094
INSTITUT UNIVERSITAIRE DE FRANCE	1	0.094
INSTITUTE FOR RESEARCH IN BIOMEDICINE IRB BARCELONA	1	0.094
INSTITUTE FOR SYSTEMS BIOLOGY ISB	1	0.094
INSTITUTE OF EXPERIMENTAL MEDICINE	1	0.094
INSTITUTE OF LIFE SCIENCES INDIA ILS	1	0.094
INSTITUTE OF MEDICINAL PLANT DEVELOPMENT CAMS	1	0.094
INSTITUTE OF MEDICINE IOM NEPAL	1	0.094
INSTITUTE OF MICROBIOLOGY OF THE CZECH ACADEMY OF SCIENCES	1	0.094
INSTITUTO DE INVESTIGACION SANITARIA BIODONOSTIA	1	0.094
INSTITUTO DE INVESTIGACION SANITARIA LA FE IIS LA FE	1	0.094
INSTITUTO DE SALUD CARLOS III	1	0.094
INSTITUTO NACIONAL DE CANCEROLOGIA INCAN	1	0.094
INSTITUTO POLITECNICO NACIONAL MEXICO	1	0.094
INTERNATIONAL CENTER FOR GENETIC ENGINEERING BIOTECHNOLOGY ICGEB NEW DELHI	1	0.094
INTERUNIV INST MYOL	1	0.094
INTERVET INTERNATIONAL B V	1	0.094
IOWA STATE UNIVERSITY	1	0.094
IRBLLEIDA	1	0.094
IRCCS AOU SAN MARTINO IST	1	0.094
IRCCS ARCISPEDALE S MARIA NUOVA	1	0.094
IRCCS FDN NEUROL INST C BESTA	1	0.094
IRCCS FONDAZIONE CASIMIRO MONDINO	1	0.094
IRCCS FONDAZIONE DEL PIEMONTE PER L ONCOLOGIA	1	0.094
IRCCS ISTITUTO DI RICERCA DIAGNOSTICA E NUCLEARE SDN	1	0.094
IRCCS ISTITUTO NEUROLOGICO BESTA	1	0.094
IRCCS ISTITUTO TUMORI BARI GIOVANNI PAOLO II	1	0.094
IRCCS MARIO NEGRI	1	0.094
IRCCS OSPEDALE SAN CAMILLO	1	0.094
ISHIKAWA PREFECTURAL NURSING UNIV	1	0.094
ISIS PHARMACEUTICALS INC	1	0.094
IST NAZL GENET MOL ROMEO ERICA INVERNIZZI INGM	1	0.094
ISTITUTO DI BIOSCIENZE E BIORISORSE IBBR CNR	1	0.094
ISTITUTO DI GENETICA E BIOFISICA ADRIANO BUZZATI TRAVERSO IGB CNR	1	0.094
ISTITUTO DI GENETICA MOLECOLARE IGM CNR	1	0.094
ISTITUTO DI NEUROSCIENZE IN CNR	1	0.094
ISTITUTO DI TECNOLOGIE BIOMEDICHE ITB CNR	1	0.094
ITMO UNIVERSITY	1	0.094
IUSM	1	0.094
IXCELLS BIOTECHNOL	1	0.094
IZS DEL MEZZOGIORNO	1	0.094
JAIPUR NATIONAL UNIVERSITY	1	0.094
JAMIA HAMDARD UNIVERSITY	1	0.094
JAPANESE RED CROSS MEDICAL CENTER	1	0.094
JAWAHARLAL NEHRU CENTER FOR ADVANCED SCIENTIFIC RESEARCH JNCASR	1	0.094
JDW PATHOL INC	1	0.094
JERRY L PETTIS MEM VET ADM MED CTR	1	0.094
JIANGSU INST NUCL MED	1	0.094
JIAXING UNIVERSITY	1	0.094
JICHI MEDICAL UNIVERSITY	1	0.094
JILIN ACAD ANIM HUSB VET MED	1	0.094
JINZHOU MEDICAL UNIVERSITY	1	0.094
JOANNEUM RES	1	0.094
JOSLIN DIABETES CENTER INC	1	0.094
JUNGWON UNIVERSITY	1	0.094
KAGOSHIMA UNIVERSITY	1	0.094
KAISER PERMANENTE	1	0.094
KALINGA INSTITUTE OF INDUSTRIAL TECHNOLOGY KIIT	1	0.094
KANAZAWA UNIVERSITY	1	0.094
KANGWON NATIONAL UNIVERSITY	1	0.094
KANSAS STATE UNIVERSITY	1	0.094
KAWASAKI MEDICAL SCHOOL	1	0.094
KAZUSA DNA RESEARCH INSTITUTE	1	0.094
KEENAN RES CTR BIOMED SCI	1	0.094
KEY LAB CARDIAC INJURY REPAIR HENAN PROV	1	0.094
KEY LAB CHEM NAT PROD GUIZHOU PROV	1	0.094
KING ABDULAZIZ UNIVERSITY	1	0.094
KNOWLEDGE SYNTH INC	1	0.094
KOBE PHARMACEUTICAL UNIVERSITY	1	0.094
KOCHI UNIVERSITY	1	0.094
KONYANG UNIVERSITY	1	0.094
KONYANG UNIVERSITY HOSPITAL	1	0.094
KOREA CDC DIVISION OF BIOSAFETY EVALUATION CONTROL	1	0.094
KOREA INSTITUTE OF ORIENTAL MEDICINE KIOM	1	0.094
KOREA INSTITUTE OF SCIENCE TECHNOLOGY KIST	1	0.094
KOREA INSTITUTE OF TOXICOLOGY	1	0.094
KOREAN INST TB	1	0.094
KRANKENHAUS BOZEN	1	0.094
KREMBIL RESEARCH INSTITUTE	1	0.094
KU LEUVEN	1	0.094
KUBOMIZUKI LADYS CLIN	1	0.094
KUNMING INSTITUTE OF ZOOLOGY	1	0.094
KUNMING UNIVERSITY OF SCIENCE TECHNOLOGY	1	0.094
KURE KYOSAI HOSP	1	0.094
KWANGWOON UNIVERSITY	1	0.094
KYUNG HEE UNIVERSITY HOSPITAL	1	0.094
KYUNGPOOK NATIONAL UNIVERSITY	1	0.094
KYUNGPOOK NATIONAL UNIVERSITY HOSPITAL	1	0.094
LA JOLLA INST IMMUNOL	1	0.094
LAB PATHOL EAST NETHERLANDS LABPON	1	0.094
LADY DAVIS INSTITUTE	1	0.094
LANZHOU UNIVERSITY	1	0.094
LANZHOU VETERINARY RESEARCH INSTITUTE CAAS	1	0.094
LATVIAN BIOMEDICAL RESEARCH STUDY CENTRE	1	0.094
LEIBNIZ FORSCHUNGSINSTITUT FURR MOLEKULARE PHARMAKOLOGIE FMP	1	0.094
LEIBNIZ INSTITUT FUR ALTERNSFORSCHUNG FRITZ LIPMANN INSTITUT FLI	1	0.094
LEIDEN UNIVERSITY MEDICAL CENTER LUMC	1	0.094
LIAOCHENG PEOPLES HOSP	1	0.094
LIFECELL CORP	1	0.094
LIMCR	1	0.094
LINKOPING UNIVERSITY	1	0.094
LINYI PEOPLES HOSP	1	0.094
LIUZHOU WORKERS HOSP	1	0.094
LIVERPOOL JOHN MOORES UNIVERSITY	1	0.094
LNCIB	1	0.094
LONDON HEALTH SCIENCES CENTRE	1	0.094
LONGYAN UNIVERSITY	1	0.094
LOUISIANA STATE UNIVERSITY HEALTH SCIENCES CENTER NEW ORLEANS	1	0.094
LOUISIANA STATE UNIVERSITY SYSTEM	1	0.094
LTTA LAB ADV THERAPIES	1	0.094
LUDWIG INSTITUTE FOR CANCER RESEARCH	1	0.094
LUNDQUIST INSTITUTE	1	0.094
MAGEE WOMENS RESEARCH INSTITUTE	1	0.094
MAHIDOL UNIVERSITY	1	0.094
MANCHESTER METROPOLITAN UNIVERSITY	1	0.094
MANIPAL ACADEMY OF HIGHER EDUCATION MAHE	1	0.094
MARCINIAK HOSP	1	0.094
MARTIN LUTHER UNIVERSITY HALLE WITTENBERG	1	0.094
MASSACHUSETTS EYE EAR INFIRMARY	1	0.094
MATERN CHILD CARE CTR DEZHOU	1	0.094
MAYO CLINIC PHOENIX	1	0.094
MCGILL GENOME CTR	1	0.094
MED FAC	1	0.094
MEDICAL RESEARCH COUNCIL UK MRC	1	0.094
MEDICAL UNIVERSITY GDANSK	1	0.094
MEDICAL UNIVERSITY OF VIENNA	1	0.094
MEMORIAL UNIVERSITY NEWFOUNDLAND	1	0.094
MERCK COMPANY	1	0.094
MG VANNINI HOSP	1	0.094
MICHIGAN MED	1	0.094
MICROSCOPY FACIL IFR 141 IPSIT	1	0.094
MIE UNIVERSITY	1	0.094
MINIA UNIVERSITY	1	0.094
MINIST HLTH	1	0.094
MINISTRY OF EDUCATION CHINA	1	0.094
MINISTRY OF JUSTICE TURKEY	1	0.094
MODERN SCIENCES ARTS UNIVERSITY MSA	1	0.094
MOUNT SINAI ST LUKE S	1	0.094
MOUNT SINAI WEST	1	0.094
MRC	1	0.094
MYONGJI UNIVERSITY	1	0.094
NAGASAKI RED CROSS HOSP	1	0.094
NANJING AGRICULTURAL UNIVERSITY	1	0.094
NANNING MUNICIPAL CTR DIS CONTROL PREVENT	1	0.094
NANOSYN INC	1	0.094
NANTES UNIVERSITE	1	0.094
NANTONG UNIVERSITY	1	0.094
NARA MEDICAL UNIVERSITY	1	0.094
NATHAN KLINE INSTITUTE FOR PSYCHIATRIC RESEARCH	1	0.094
NATIONAL CANCER INSTITUTE INCA	1	0.094
NATIONAL CENTER FOR CHILD HEALTH DEVELOPMENT JAPAN	1	0.094
NATIONAL CENTER FOR NEUROLOGY PSYCHIATRY JAPAN	1	0.094
NATIONAL CENTRE FOR BIOLOGICAL SCIENCES NCBS	1	0.094
NATIONAL CEREBRAL CARDIOVASCULAR CENTER JAPAN	1	0.094
NATIONAL CHENG KUNG UNIVERSITY HOSPITAL	1	0.094
NATIONAL CHUNG HSING UNIVERSITY	1	0.094
NATIONAL DEFENSE MEDICAL CENTER	1	0.094
NATIONAL HEALTH RESEARCH INSTITUTES TAIWAN	1	0.094
NATIONAL INSTITUTE OF ADVANCED INDUSTRIAL SCIENCE TECHNOLOGY AIST	1	0.094
NATIONAL INSTITUTE OF ANIMAL SCIENCE	1	0.094
NATIONAL JEWISH HEALTH	1	0.094
NATIONAL TSING HUA UNIVERSITY	1	0.094
NATIONAL UNIVERSITY OF MAR DEL PLATA	1	0.094
NATL INST BIOL SCI	1	0.094
NATL UNIV SINGAPORE SUZHOU RES INST	1	0.094
NCT HEIDELBERG KITZ	1	0.094
NEO PROTE INC	1	0.094
NESTLE SA	1	0.094
NETHERLANDS CANCER INSTITUTE	1	0.094
NETHERLANDS PROTE CTR	1	0.094
NEVADA SYSTEM OF HIGHER EDUCATION NSHE	1	0.094
NEW JERSEY INSTITUTE OF TECHNOLOGY	1	0.094
NEW YORK MEDICAL COLLEGE	1	0.094
NEW YORK STEM CELL FDN RES INST	1	0.094
NEWYORK PRESBYTERIAN HOSPITAL	1	0.094
NIH NATIONAL EYE INSTITUTE NEI	1	0.094
NIH NATIONAL INSTITUTE OF DIABETES DIGESTIVE KIDNEY DISEASES NIDDK	1	0.094
NIH NCATS NCGC	1	0.094
NIIGATA UNIVERSITY	1	0.094
NORTH CHINA UNIVERSITY OF SCIENCE TECHNOLOGY	1	0.094
NORTH SICHUAN MEDICAL UNIVERSITY	1	0.094
NORTHWELL HEALTH	1	0.094
NORTHWEST A F UNIVERSITY CHINA	1	0.094
NOVA SOUTHEASTERN UNIVERSITY	1	0.094
NOVO NORDISK FOUNDATION	1	0.094
NSW HLTH PATHOL	1	0.094
NW UNIV CHICAGO	1	0.094
NYU LANGONE MEDICAL CENTER	1	0.094
OAKLAND UNIVERSITY	1	0.094
OCEAN UNIVERSITY OF CHINA	1	0.094
OITA UNIVERSITY	1	0.094
OKAYAMA UNIVERSITY	1	0.094
ONTARIO INSTITUTE FOR CANCER RESEARCH	1	0.094
ORLANDI HOSP	1	0.094
OSAKA CITY UNIVERSITY	1	0.094
OSPED CHIARENZI	1	0.094
OSPED ORLANDI	1	0.094
OSPEDALE DI BELLUNO	1	0.094
OSPEDALE MATER SALUTIS DI LEGNAGO	1	0.094
OUH	1	0.094
OZGENE PTY LTD	1	0.094
PARACELSUS PRIVATE MEDICAL UNIVERSITY	1	0.094
PARIS SCI LETTRES RES UNIV	1	0.094
PASTEUR INSTITUTE OF IRAN	1	0.094
PEOPLES HOSP XIANJU CITY	1	0.094
PFIZER	1	0.094
PILOT NATL LAB MARINE SCI TECHNOL QINGDAO	1	0.094
POLYTECHNIC UNIVERSITY OF CATALONIA	1	0.094
POMPEU FABRA UNIVERSITY	1	0.094
PONTIFICIA UNIVERSIDADE CATOLICA DO RIO GRANDE DO SUL	1	0.094
PRINCE OF ASTURIAS UNIVERSITY HOSPITAL	1	0.094
PRINCESS MARGARET CANCER CENTRE	1	0.094
PRINCESS MAXIMA CTR PEDIAT ONCOL	1	0.094
PRINCETON UNIVERSITY	1	0.094
PRIVATE HOSP VILLA MELITTA	1	0.094
PURDUE UNIVERSITY	1	0.094
PURDUE UNIVERSITY SYSTEM	1	0.094
PURDUE UNIVERSITY WEST LAFAYETTE CAMPUS	1	0.094
PUSAN NATIONAL UNIVERSITY	1	0.094
QILU UNIVERSITY OF TECHNOLOGY	1	0.094
QINGDAO MUNICIPAL HOSPITAL	1	0.094
QINGDAO NATL LAB MARINE SCI TECHNOL	1	0.094
QUEEN MARY UNIVERSITY LONDON	1	0.094
RAMON Y CAJAL INST SANIT RES IRYCIS	1	0.094
RED CROSS HOSP	1	0.094
REDE DOR SAO LUIZ	1	0.094
REED COLLEGE OREGON	1	0.094
RES INST FISHERIES AQUACULTURE	1	0.094
RES INST MICROBIAL DIS	1	0.094
RES SERV 151 OMAHA VET AFFAIRS MED CTR	1	0.094
RESEARCH INSTITUTE AT NATIONWIDE CHILDREN S HOSPITAL	1	0.094
RIGA STRADINS UNIVERSITY	1	0.094
RIKEN	1	0.094
RITSUMEIKAN UNIVERSITY	1	0.094
ROCHESTER INSTITUTE OF TECHNOLOGY	1	0.094
ROYAL HOSP CHILDREN	1	0.094
ROYAL NETHERLANDS ACADEMY OF ARTS SCIENCES	1	0.094
ROYAL PERTH HOSPITAL	1	0.094
RUHR UNIVERSITY BOCHUM	1	0.094
RURAL DEVELOPMENT ADMINISTRATION RDA	1	0.094
RUTGERS NEW JERSEY MED HIGH SCH	1	0.094
SAARLAND UNIVERSITY	1	0.094
SABANCI UNIVERSITY	1	0.094
SACKLER FACULTY OF MEDICINE	1	0.094
SAHA INSTITUTE OF NUCLEAR PHYSICS	1	0.094
SAHLGRENSKA UNIVERSITY HOSPITAL	1	0.094
SAI LIFE SCI LTD	1	0.094
SAIC FREDERICK	1	0.094
SAINT LOUIS UNIVERSITY	1	0.094
SAINT LUKES EPISCOPAL HOSPITAL	1	0.094
SAINT MARIANNA UNIVERSITY	1	0.094
SAN FRANCISCO VA MEDICAL CENTER	1	0.094
SANFORD BURNHAM PREBYS MEDICAL DISCOVERY INSTITUTE	1	0.094
SANTA MARIA GORETTI HOSP	1	0.094
SAPPORO MEDICAL UNIVERSITY	1	0.094
SASAKI FDN	1	0.094
SAVITRIBAI PHULE PUNE UNIVERSITY	1	0.094
SCIENCE APPLICATIONS INTERNATIONAL CORPORATION SAIC	1	0.094
SEATTLE CANCER CARE ALLIANCE	1	0.094
SEATTLE CHILDREN S HOSPITAL	1	0.094
SECOND PEOPLE S HOSPITAL OF SHENZHEN	1	0.094
SECRETARIA SALUD MEXICO	1	0.094
SEKISUI XENOTECH LLC	1	0.094
SEMMELWEIS UNIVERSITY	1	0.094
SEMNAN UNIVERSITY OF MEDICAL SCIENCES	1	0.094
SEOUL ST MARY S HOSPITAL	1	0.094
SEVERANCE BIOMED SCI INST	1	0.094
SHAHID BEHESHTI UNIVERSITY MEDICAL SCIENCES	1	0.094
SHANDONG AGRICULTURAL UNIVERSITY	1	0.094
SHANDONG KEY LAB BRAIN FUNCT REMODELING	1	0.094
SHANDONG PROV CTR ANIM DIS CONTROL PREVENT	1	0.094
SHANDONG UNIVERSITY OF TRADITIONAL CHINESE MEDICINE	1	0.094
SHANDONG WOMENS UNIV	1	0.094
SHANGHAI COLL TCM NEW DRUG DISCOVERY	1	0.094
SHANGHAI EIGHTH PEOPLES HOSP	1	0.094
SHANGHAI INST CARDIOVASC DIS	1	0.094
SHANGHAI KEY LAB CLIN GERIATR MED	1	0.094
SHANGHAI KEY LAB REPROD MED	1	0.094
SHANGHAI OCEAN UNIVERSITY	1	0.094
SHANGHAI PUTUO DIST PEOPLES HOSP	1	0.094
SHANGHAI SONGJIANG DIST CENT HOSP	1	0.094
SHANGHAI UNIV MED HLTH SCI	1	0.094
SHANGHAITECH UNIVERSITY	1	0.094
SHANXI UNIVERSITY	1	0.094
SHENYANG 739 HOSP	1	0.094
SHENZHEN CTR CHRON DIS CONTROL	1	0.094
SHENZHEN CTR DIS CONTROL PREVENT	1	0.094
SHENZHEN GENTARGET BIOPHARMACEUT CO LTD	1	0.094
SHENZHEN NANSHAN CTR CHRON DIS CONTROL	1	0.094
SHOWA PHARMACEUTICAL UNIVERSITY	1	0.094
SICHUAN AGRICULTURAL UNIVERSITY	1	0.094
SICHUAN PROVINCIAL PEOPLE S HOSPITAL	1	0.094
SIDRA MED	1	0.094
SINGAPORE GENERAL HOSPITAL	1	0.094
SKANE UNIVERSITY HOSPITAL	1	0.094
SOMA CENT HOSP	1	0.094
SOOKMYUNG WOMEN S UNIVERSITY	1	0.094
SOUTH AFRICAN MEDICAL RESEARCH COUNCIL	1	0.094
SOUTH CENTRAL UNIVERSITY FOR NATIONALITIES	1	0.094
SOUTH CHINA AGRICULTURAL UNIVERSITY	1	0.094
SOUTH CHINA NORMAL UNIVERSITY	1	0.094
SPANISH RES COUNCIL	1	0.094
ST ANNASTIFT CHILDRENS HOSP	1	0.094
ST PAUL S HOSPITAL	1	0.094
ST VINCENT S INSTITUTE OF MEDICAL RESEARCH	1	0.094
STATE KEY LABORATORY OF TRANSIENT OPTICS PHOTONICS	1	0.094
STATE UNIVERSITY OF NEW YORK SUNY BUFFALO	1	0.094
STOWERS INSTITUTE FOR MEDICAL RESEARCH	1	0.094
SUNNYBROOK HEALTH SCIENCE CENTER	1	0.094
SUNNYBROOK RESEARCH INSTITUTE	1	0.094
SUNY OPTOMETRY	1	0.094
SUZHOU INST SYST MED	1	0.094
SWISS INSTITUTE EXPERIMENTAL CANCER RESEARCH	1	0.094
SZEGED UNIVERSITY	1	0.094
TAICHUNG VETERANS GENERAL HOSPITAL	1	0.094
TAISHAN MED UNIV SHANDONG PROV	1	0.094
TAISHO PHARMACEUTICAL HOLDINGS CO LTD	1	0.094
TATA INSTITUTE OF FUNDAMENTAL RESEARCH TIFR	1	0.094
TATA MEMORIAL CENTRE TMC	1	0.094
TATA MEMORIAL HOSPITAL	1	0.094
TECHNISCHE UNIVERSITAT ILMENAU	1	0.094
TEL AVIV SOURASKY MEDICAL CENTER	1	0.094
TEL AVIV UNIVERSITY	1	0.094
TEXAS A M UNIVERSITY COLLEGE STATION	1	0.094
TEXAS A M UNIVERSITY SYSTEM	1	0.094
TEXAS TECH UNIVERSITY	1	0.094
TEXAS TECH UNIVERSITY SYSTEM	1	0.094
THERANEXUS	1	0.094
THERMO FISHER SCIENTIFIC	1	0.094
TIANJIN BINHAI NEW AREA DAGANG HOSP	1	0.094
TIANJIN CIVIL AFFAIRS BUR GERIATR HOSP	1	0.094
TIANJIN HAIHE HOSP	1	0.094
TIANJIN UNIVERSITY	1	0.094
TIANJIN UNIVERSITY OF TRADITIONAL CHINESE MEDICINE	1	0.094
TOKAI UNIVERSITY	1	0.094
TOKUSHIMA UNIVERSITY	1	0.094
TOKYO INSTITUTE OF TECHNOLOGY	1	0.094
TOKYO MEDICAL UNIVERSITY	1	0.094
TOKYO UNIVERSITY OF SCIENCE	1	0.094
TOP INSTITUTE FOOD NUTRITION	1	0.094
TORREY PINES INST MOL STUDIES	1	0.094
TORREY PINES INSTITUTE FOR MOLECULAR STUDIES FLORIDA	1	0.094
TOURO UNIVERSITY CALIFORNIA	1	0.094
TRIBHUVAN UNIVERSITY	1	0.094
TRILLIUM HEALTH PARTNERS	1	0.094
TRINITY COLLEGE DUBLIN	1	0.094
TUFTS MEDICAL CENTER	1	0.094
UCLA JONSSON COMPREHENSIVE CANCER CENTER	1	0.094
UG MUG	1	0.094
ULSS 1 DOLOMITI	1	0.094
ULSS 9 SCALIGERA	1	0.094
ULSTER UNIVERSITY	1	0.094
UNIV CHICAGO MED	1	0.094
UNIV HOSP SALAMANCA	1	0.094
UNIV HOSP ZURICH	1	0.094
UNIV LUBECK	1	0.094
UNIV LYON	1	0.094
UNIV PARIS	1	0.094
UNIVERSIDAD CATOLICA DEL MAULE	1	0.094
UNIVERSIDAD CIENTIFICA DEL SUR CIENTIFICA	1	0.094
UNIVERSIDAD DE ALCALA	1	0.094
UNIVERSIDAD DE CASTILLA LA MANCHA	1	0.094
UNIVERSIDAD DE LEON	1	0.094
UNIVERSIDAD PABLO DE OLAVIDE	1	0.094
UNIVERSIDAD SAN SEBASTIAN	1	0.094
UNIVERSIDADE DE SAO PAULO	1	0.094
UNIVERSIDADE ESTADUAL DE CAMPINAS	1	0.094
UNIVERSIDADE FEDERAL DE CIENCIAS DA SAUDE DE PORTO ALEGRE	1	0.094
UNIVERSIDADE FEDERAL DE PERNAMBUCO	1	0.094
UNIVERSIDADE FEDERAL DO RIO GRANDE DO SUL	1	0.094
UNIVERSIDADE TECNOLOGICA FEDERAL DO PARANA	1	0.094
UNIVERSITA DEGLI STUDI DI BARI ALDO MORO	1	0.094
UNIVERSITATSKLINIKUM DES SAARLANDES	1	0.094
UNIVERSITE CATHOLIQUE LOUVAIN	1	0.094
UNIVERSITE CLAUDE BERNARD LYON 1	1	0.094
UNIVERSITE D ANGERS	1	0.094
UNIVERSITE DE LILLE	1	0.094
UNIVERSITE DE LORRAINE	1	0.094
UNIVERSITE DE MONTPELLIER	1	0.094
UNIVERSITE DE POITIERS	1	0.094
UNIVERSITE DE RENNES 1	1	0.094
UNIVERSITE DE SAVOIE	1	0.094
UNIVERSITE TOULOUSE III PAUL SABATIER	1	0.094
UNIVERSITY CAMPUS BIO MEDICO ROME ITALY	1	0.094
UNIVERSITY COLLEGE DUBLIN	1	0.094
UNIVERSITY HOSPITAL OF SIENA	1	0.094
UNIVERSITY HOSPITAL OF UDINE	1	0.094
UNIVERSITY HOSPITAL OLOMOUC	1	0.094
UNIVERSITY OF ADELAIDE	1	0.094
UNIVERSITY OF AGRICULTURAL SCIENCES VETERINARY MEDICINE CLUJ NAPOCA	1	0.094
UNIVERSITY OF AKRON	1	0.094
UNIVERSITY OF ALABAMA TUSCALOOSA	1	0.094
UNIVERSITY OF ARIZONA	1	0.094
UNIVERSITY OF ARKANSAS MEDICAL SCIENCES	1	0.094
UNIVERSITY OF ARKANSAS SYSTEM	1	0.094
UNIVERSITY OF AUCKLAND	1	0.094
UNIVERSITY OF BOLOGNA	1	0.094
UNIVERSITY OF BRISTOL	1	0.094
UNIVERSITY OF CALIFORNIA LOS ANGELES MEDICAL CENTER	1	0.094
UNIVERSITY OF CAPE COAST	1	0.094
UNIVERSITY OF COLORADO BOULDER	1	0.094
UNIVERSITY OF DENVER	1	0.094
UNIVERSITY OF ELECTRONIC SCIENCE TECHNOLOGY OF CHINA	1	0.094
UNIVERSITY OF FLORIDA	1	0.094
UNIVERSITY OF FOGGIA	1	0.094
UNIVERSITY OF GENEVA	1	0.094
UNIVERSITY OF GEORGIA	1	0.094
UNIVERSITY OF GOTTINGEN	1	0.094
UNIVERSITY OF GRANADA	1	0.094
UNIVERSITY OF HELSINKI	1	0.094
UNIVERSITY OF HYDERABAD	1	0.094
UNIVERSITY OF ILLINOIS CHICAGO	1	0.094
UNIVERSITY OF ILLINOIS CHICAGO HOSPITAL	1	0.094
UNIVERSITY OF INDONESIA	1	0.094
UNIVERSITY OF INSUBRIA	1	0.094
UNIVERSITY OF JINAN	1	0.094
UNIVERSITY OF KENT	1	0.094
UNIVERSITY OF KIEL	1	0.094
UNIVERSITY OF LONDON ROYAL VETERINARY COLLEGE	1	0.094
UNIVERSITY OF MANITOBA	1	0.094
UNIVERSITY OF MISSOURI COLUMBIA	1	0.094
UNIVERSITY OF MISSOURI SYSTEM	1	0.094
UNIVERSITY OF MONCTON	1	0.094
UNIVERSITY OF NAMUR	1	0.094
UNIVERSITY OF NEBRASKA LINCOLN	1	0.094
UNIVERSITY OF NEVADA RENO	1	0.094
UNIVERSITY OF NEW SOUTH WALES SYDNEY	1	0.094
UNIVERSITY OF NORTH CAROLINA SCHOOL OF MEDICINE	1	0.094
UNIVERSITY OF NORTH DAKOTA GRAND FORKS	1	0.094
UNIVERSITY OF OTAGO	1	0.094
UNIVERSITY OF PLYMOUTH	1	0.094
UNIVERSITY OF SALENTO	1	0.094
UNIVERSITY OF SCIENCE TECHNOLOGY UST	1	0.094
UNIVERSITY OF SHEFFIELD	1	0.094
UNIVERSITY OF SHERBROOKE	1	0.094
UNIVERSITY OF SIENA	1	0.094
UNIVERSITY OF SPLIT	1	0.094
UNIVERSITY OF SZCZECIN	1	0.094
UNIVERSITY OF TEXAS RIO GRANDE VALLEY	1	0.094
UNIVERSITY OF TOLEDO	1	0.094
UNIVERSITY OF TOLEDO HEALTH SCIENCE CAMPUS	1	0.094
UNIVERSITY OF TOYAMA	1	0.094
UNIVERSITY OF UTAH	1	0.094
UNIVERSITY OF VERMONT	1	0.094
UNIVERSITY OF WARSAW	1	0.094
US FOOD DRUG ADMINISTRATION FDA	1	0.094
USANA HLTH SCI INC	1	0.094
UTAH SYSTEM OF HIGHER EDUCATION	1	0.094
VA GREATER LOS ANGELES HEALTHCARE SYSTEM	1	0.094
VA MD COLL VET MED	1	0.094
VAL DE GRACE HOSPITAL	1	0.094
VICTORIA UNIVERSITY	1	0.094
VIJ BIOTECH LLC	1	0.094
VIPRAGEN BIOSCI PRIVATE LTD	1	0.094
VIR BIOTECHNOL	1	0.094
VIRGINIA POLYTECHNIC INSTITUTE STATE UNIVERSITY	1	0.094
VIROCLIN BIOSCI	1	0.094
VIVA BIOTECH	1	0.094
WAGENINGEN UNIVERSITY RESEARCH	1	0.094
WAKAYAMA MEDICAL UNIVERSITY	1	0.094
WASEDA UNIVERSITY	1	0.094
WEIFANG MEDICAL UNIVERSITY	1	0.094
WEILL CORNELL MEDICAL COLLEGE QATAR	1	0.094
WEIZMANN INSTITUTE OF SCIENCE	1	0.094
WESSEX FERTIL CLIN	1	0.094
WEST LOS ANGELES VA HEALTHCARE CTR	1	0.094
WESTERN SYDNEY UNIVERSITY	1	0.094
WESTERN UNIVERSITY UNIVERSITY OF WESTERN ONTARIO	1	0.094
WESTLAKE UNIVERSITY	1	0.094
WICELL RESEARCH INSTITUTE	1	0.094
WILHELMINA KINDERZIEKENHUIS	1	0.094
WINTHROP UNIVERSITY HOSPITAL	1	0.094
WUHAN CTR DIS PREVENT CONTROL	1	0.094
WUHAN GEN HOSP	1	0.094
WUHAN GEN HOSP GUANGZHOU MIL REG	1	0.094
XI AN INSTITUTE OF OPTICS PRECISION MECHANICS CAS	1	0.094
XIANGYA MED COLL CSU	1	0.094
YANBIAN UNIVERSITY	1	0.094
YENEPOYA DEEMED TO BE UNIVERSITY	1	0.094
ZANJAN UNIV MED SCI	1	0.094
ZHEJIANG CHINESE MEDICAL UNIVERSITY	1	0.094
ZHEJIANG HOSP	1	0.094
ZHEJIANG PROV KEY LAB ORTHPAED	1	0.094
ZHONGSHAN PEOPLES HOSP	1	0.094
ZUCKER SCH MED HOFSTRA NORTHWELL	1	0.094

## Sheet: authors
authors	count	% of 1,059
Ballabio A	62	5.855
Argani P	22	2.077
Chen Y	19	1.794
Li Y	19	1.794
Liu Y	17	1.605
Medina DL	17	1.605
Zhang L	17	1.605
Zhang Y	16	1.511
Li M	15	1.416
Puertollano R	15	1.416
Wang X	15	1.416
Diwan A	13	1.228
Sardiello M	13	1.228
Wang Y	13	1.228
Zhang H	13	1.228
Martina JA	12	1.133
Settembre C	12	1.133
Hes O	11	1.039
Martignoni G	11	1.039
Napolitano G	11	1.039
Wang L	11	1.039
Xu Y	11	1.039
Fisher DE	10	0.944
Li C	10	0.944
Li X	10	0.944
Pastore N	10	0.944
Segatori L	10	0.944
Brunelli M	9	0.85
Li L	9	0.85
Reuter VE	9	0.85
Song JX	9	0.85
Wang HF	9	0.85
Xu HX	9	0.85
Deretic V	8	0.755
Ding WX	8	0.755
Huynh T	8	0.755
Kim S	8	0.755
Li J	8	0.755
Liu F	8	0.755
Liu J	8	0.755
Rao Q	8	0.755
Wang J	8	0.755
Yang L	8	0.755
Ying Z	8	0.755
Zhang Q	8	0.755
Zhang XL	8	0.755
Zhang ZY	8	0.755
Cheng L	7	0.661
Choi SW	7	0.661
De Cegli R	7	0.661
Di Malta C	7	0.661
Emiliani C	7	0.661
Ferguson SM	7	0.661
Gao WY	7	0.661
Irazoqui JE	7	0.661
Ladanyi M	7	0.661
Lu JH	7	0.661
Mehra R	7	0.661
Netto GJ	7	0.661
Polishchuk E	7	0.661
Razani B	7	0.661
Segala D	7	0.661
Shen HM	7	0.661
Wang SG	7	0.661
Wang ZY	7	0.661
Williamson SR	7	0.661
Yoshimori T	7	0.661
Zhang N	7	0.661
Zhang T	7	0.661
Zhao Y	7	0.661
Zhou XJ	7	0.661
Calio A	6	0.567
Chao XJ	6	0.567
Chen X	6	0.567
Chen YN	6	0.567
Giatromanolaki A	6	0.567
He X	6	0.567
Hood DA	6	0.567
Huang Y	6	0.567
Kim J	6	0.567
Koukourakis MI	6	0.567
Kumar S	6	0.567
Li B	6	0.567
Liu HY	6	0.567
Liu L	6	0.567
Ma XC	6	0.567
Mudd MH	6	0.567
Ren J	6	0.567
Sadoshima J	6	0.567
Sandri M	6	0.567
Sreenivasmurthy SG	6	0.567
Wang F	6	0.567
Wang GH	6	0.567
Wang Q	6	0.567
Wang W	6	0.567
Wang Z	6	0.567
Yu L	6	0.567
Yuan YJ	6	0.567
Zhang J	6	0.567
Zhang JB	6	0.567
Zheng H	6	0.567
Zhu Y	6	0.567
Zhu Z	6	0.567
Brunetti-pierri N	5	0.472
Chen HW	5	0.472
Chen J	5	0.472
Chen W	5	0.472
Chen YB	5	0.472
Chen YH	5	0.472
Cheng JQ	5	0.472
Cheung KH	5	0.472
Di Bernardo D	5	0.472
Di Ronza A	5	0.472
Ding J	5	0.472
Epstein JI	5	0.472
Evans TD	5	0.472
Fan YB	5	0.472
Gao F	5	0.472
Gobbo S	5	0.472
Gupta S	5	0.472
He L	5	0.472
Huang J	5	0.472
Iyaswamy A	5	0.472
Jain A	5	0.472
Jo EK	5	0.472
Kalamida D	5	0.472
Kim D	5	0.472
Kim JK	5	0.472
Kim KH	5	0.472
Kimura T	5	0.472
Kroemer G	5	0.472
Kwon HJ	5	0.472
La Spada AR	5	0.472
Lee MS	5	0.472
Lee SH	5	0.472
Li H	5	0.472
Li JF	5	0.472
Li R	5	0.472
Li W	5	0.472
Li XY	5	0.472
Li Z	5	0.472
Li ZY	5	0.472
Linehan WM	5	0.472
Liu B	5	0.472
Liu JP	5	0.472
Liu P	5	0.472
Liu W	5	0.472
Liu YY	5	0.472
Liu ZX	5	0.472
Lu YR	5	0.472
Lu ZF	5	0.472
Ma HH	5	0.472
Ma J	5	0.472
Magi-galluzzi C	5	0.472
Magini A	5	0.472
Malouf GG	5	0.472
Michal M	5	0.472
Montefusco S	5	0.472
Montironi R	5	0.472
Nakamura S	5	0.472
Ni HM	5	0.472
Nusco E	5	0.472
Palmieri M	5	0.472
Polishchuk R	5	0.472
Popp L	5	0.472
Schilling JD	5	0.472
Soldati C	5	0.472
Steingrimsson E	5	0.472
Urbanelli L	5	0.472
Wang B	5	0.472
Wang K	5	0.472
Wang M	5	0.472
Wang P	5	0.472
Wang YF	5	0.472
Xia QY	5	0.472
Xu HZ	5	0.472
Xu M	5	0.472
Zhang HJ	5	0.472
Zhang JF	5	0.472
Zhang X	5	0.472
Zhang XY	5	0.472
Zhang YJ	5	0.472
Zhang Z	5	0.472
Zhou KL	5	0.472
Zhou M	5	0.472
Allers L	4	0.378
Armani A	4	0.378
Calcagni A	4	0.378
Camparo P	4	0.378
Cesselli D	4	0.378
Chauhan S	4	0.378
Chen D	4	0.378
Chen G	4	0.378
Chen H	4	0.378
Chen L	4	0.378
Chen XY	4	0.378
Chen YE	4	0.378
Chen YF	4	0.378
De Matteis MA	4	0.378
Doglioni C	4	0.378
Erlich AT	4	0.378
Esposito A	4	0.378
Gao Q	4	0.378
He HY	4	0.378
Huang B	4	0.378
Hwang HY	4	0.378
Jin J	4	0.378
Kehrl JH	4	0.378
Kepp O	4	0.378
Kienesberger PC	4	0.378
Kim H	4	0.378
Kim JH	4	0.378
Kim JM	4	0.378
Kim SH	4	0.378
Kim YJ	4	0.378
Klisch TJ	4	0.378
Klumperman J	4	0.378
Kuroda N	4	0.378
Lee JM	4	0.378
Li CY	4	0.378
Li F	4	0.378
Li Q	4	0.378
Li YT	4	0.378
Li YY	4	0.378
Liang WY	4	0.378
Liu HF	4	0.378
Lotfi P	4	0.378
Lu HC	4	0.378
Luo J	4	0.378
Ma QL	4	0.378
Maysinger D	4	0.378
Mckenney JK	4	0.378
Moch H	4	0.378
Monfregola J	4	0.378
Pahan K	4	0.378
Pedron S	4	0.378
Peters R	4	0.378
Pi HF	4	0.378
Polchi A	4	0.378
Pulinilkunnil T	4	0.378
Qin ZH	4	0.378
Sagini K	4	0.378
Sciarretta S	4	0.378
Shi CS	4	0.378
Shi SS	4	0.378
Song WS	4	0.378
Spampanato C	4	0.378
Tian L	4	0.378
Tong BCK	4	0.378
Vega-rubin-de-celis S	4	0.378
Vetrini F	4	0.378
Visvikis O	4	0.378
Wang CY	4	0.378
Wang JG	4	0.378
Wang LM	4	0.378
Wang NN	4	0.378
Wang WJ	4	0.378
Wang XM	4	0.378
Wang XY	4	0.378
Weinheimer CJ	4	0.378
Wu HQ	4	0.378
Xia Q	4	0.378
Xiao H	4	0.378
Xiao QL	4	0.378
Xu SQ	4	0.378
Yang Z	4	0.378
Ye X	4	0.378
Yu ZP	4	0.378
Zhang HL	4	0.378
Zhang JQ	4	0.378
Zhang K	4	0.378
Zhang YM	4	0.378
Zhou J	4	0.378
Zhou W	4	0.378
Zhou X	4	0.378
Zhou Z	4	0.378
Amin MB	3	0.283
Annunziata F	3	0.283
Annunziata P	3	0.283
Antebi A	3	0.283
Antonescu CR	3	0.283
Assaraf YG	3	0.283
Bartlett JJ	3	0.283
Bast RC	3	0.283
Bhattacharya S	3	0.283
Bodas M	3	0.283
Botelho RJ	3	0.283
Brady OA	3	0.283
Brugarolas J	3	0.283
Buratta S	3	0.283
Catz SD	3	0.283
Cesana M	3	0.283
Chen C	3	0.283
Chen JJ	3	0.283
Chen JL	3	0.283
Chen LL	3	0.283
Chen N	3	0.283
Chen S	3	0.283
Cheville JC	3	0.283
Chilosi M	3	0.283
Cooper JD	3	0.283
Couturier J	3	0.283
Davis IJ	3	0.283
Deng HB	3	0.283
Dhanasekaran SM	3	0.283
Diab HI	3	0.283
Ding X	3	0.283
Dong W	3	0.283
Durairajan SSK	3	0.283
Eble JN	3	0.283
El-houjeiri L	3	0.283
Epelman S	3	0.283
Fan DP	3	0.283
Feldman RA	3	0.283
Ferrer M	3	0.283
Gabig-ciminska M	3	0.283
Gan L	3	0.283
Garcia-barrio MT	3	0.283
Geller JI	3	0.283
Gill AJ	3	0.283
Godar RJ	3	0.283
Grignon DJ	3	0.283
Guan S	3	0.283
Guerrero-gomez D	3	0.283
Guo B	3	0.283
He J	3	0.283
Herz NJ	3	0.283
Hora M	3	0.283
Huang DS	3	0.283
Hwang IY	3	0.283
Illei PB	3	0.283
Isaka Y	3	0.283
Jakobkiewicz-banecka J	3	0.283
Jakobsson J	3	0.283
Jana M	3	0.283
Javaheri A	3	0.283
Jia C	3	0.283
Jiang W	3	0.283
Jiang XJ	3	0.283
Jo C	3	0.283
Johansen T	3	0.283
Ke HH	3	0.283
Kemper B	3	0.283
Kemper JK	3	0.283
Kim HR	3	0.283
Kim SY	3	0.283
Kim UH	3	0.283
Kim YC	3	0.283
Kim YS	3	0.283
Kobayashi T	3	0.283
Koh YH	3	0.283
Kovacs A	3	0.283
Kumar A	3	0.283
Lae M	3	0.283
Lakshmana MK	3	0.283
Lazarou M	3	0.283
Lee GH	3	0.283
Lee M	3	0.283
Lee SY	3	0.283
Lee Y	3	0.283
Li D	3	0.283
Li DM	3	0.283
Li RZ	3	0.283
Li WJ	3	0.283
Li XJ	3	0.283
Li XQ	3	0.283
Li YL	3	0.283
Li ZH	3	0.283
Liang XL	3	0.283
Lin F	3	0.283
Lin JR	3	0.283
Lin JT	3	0.283
Liu H	3	0.283
Liu N	3	0.283
Liu SY	3	0.283
Liu XJ	3	0.283
Lopez JI	3	0.283
Lu J	3	0.283
Lu LQ	3	0.283
Lu QY	3	0.283
Luo WW	3	0.283
Ma H	3	0.283
Ma SM	3	0.283
Madeo F	3	0.283
Mansueto G	3	0.283
Mao KM	3	0.283
Mari M	3	0.283
Marugan J	3	0.283
Matarese M	3	0.283
Merino MJ	3	0.283
Minami S	3	0.283
Miranda-vizuete A	3	0.283
Mitrakas A	3	0.283
Molinie V	3	0.283
Moskot M	3	0.283
Murphy JT	3	0.283
Nabar NR	3	0.283
Najibi M	3	0.283
Pan B	3	0.283
Pan H	3	0.283
Pan ZY	3	0.283
Paquette M	3	0.283
Parenti G	3	0.283
Park J	3	0.283
Park JW	3	0.283
Pause A	3	0.283
Pea M	3	0.283
Peluso I	3	0.283
Pena-llopis S	3	0.283
Peng L	3	0.283
Pisonero-vaquero S	3	0.283
Polishchuk EV	3	0.283
Pouliliou S	3	0.283
Raben N	3	0.283
Rosato AS	3	0.283
Rusten TE	3	0.283
Sauvat A	3	0.283
Sharp PA	3	0.283
Shen Q	3	0.283
Shi QL	3	0.283
Shi W	3	0.283
Singh R	3	0.283
Skala SL	3	0.283
Song J	3	0.283
Su CF	3	0.283
Su HM	3	0.283
Su XP	3	0.283
Sun B	3	0.283
Sun L	3	0.283
Sun X	3	0.283
Takahashi A	3	0.283
Tan MD	3	0.283
Tancini B	3	0.283
Tang X	3	0.283
Tang ZH	3	0.283
Tannir NM	3	0.283
Thomes PG	3	0.283
Tian NF	3	0.283
Tretiakova MS	3	0.283
Trivedi PC	3	0.283
Tu P	3	0.283
Vainshtein A	3	0.283
Valapala M	3	0.283
Veenendaal T	3	0.283
Vij N	3	0.283
Wang GP	3	0.283
Wang HJ	3	0.283
Wang JD	3	0.283
Wang SY	3	0.283
Wang XJ	3	0.283
Wang XP	3	0.283
Wang XT	3	0.283
Wang YD	3	0.283
Wang YG	3	0.283
Wang YH	3	0.283
Wang YT	3	0.283
Wang YZ	3	0.283
Wen LP	3	0.283
Wen Y	3	0.283
Wu CF	3	0.283
Wu CL	3	0.283
Wu CY	3	0.283
Wu H	3	0.283
Wu HL	3	0.283
Wu M	3	0.283
Wu Y	3	0.283
Wu YS	3	0.283
Xia Y	3	0.283
Xiao Y	3	0.283
Xie J	3	0.283
Xie LH	3	0.283
Xie W	3	0.283
Xu C	3	0.283
Xu DL	3	0.283
Xu J	3	0.283
Xu L	3	0.283
Xu P	3	0.283
Xu T	3	0.283
Yamamoto M	3	0.283
Yan P	3	0.283
Yang CB	3	0.283
Yang H	3	0.283
Yang J	3	0.283
Yang JS	3	0.283
Yang JY	3	0.283
Yang MM	3	0.283
Yang Q	3	0.283
Yang X	3	0.283
Yang YF	3	0.283
Yang YZ	3	0.283
Yang ZQ	3	0.283
Ye SB	3	0.283
Yin XM	3	0.283
Yu YH	3	0.283
Yuan HQ	3	0.283
Yuan LH	3	0.283
Yuan W	3	0.283
Yue Y	3	0.283
Zeng Y	3	0.283
Zhan HQ	3	0.283
Zhang C	3	0.283
Zhang CC	3	0.283
Zhang D	3	0.283
Zhang HF	3	0.283
Zhang HM	3	0.283
Zhang HT	3	0.283
Zhang JY	3	0.283
Zhang JZ	3	0.283
Zhang M	3	0.283
Zhang S	3	0.283
Zhang W	3	0.283
Zhang XM	3	0.283
Zhang YX	3	0.283
Zhang ZL	3	0.283
Zhao L	3	0.283
Zhao Q	3	0.283
Zhao XC	3	0.283
Zhen XC	3	0.283
Zhitomirsky B	3	0.283
Zhou B	3	0.283
Zhou L	3	0.283
Zhou YF	3	0.283
Zhu TQ	3	0.283
Zhu YT	3	0.283
Zou F	3	0.283
Adachi H	2	0.189
Advani A	2	0.189
Advani SL	2	0.189
Agaimy A	2	0.189
Ahn JH	2	0.189
Aki T	2	0.189
Alaghehbandan R	2	0.189
Aleksova A	2	0.189
Alghamdi TA	2	0.189
Alsaleh G	2	0.189
Angelini C	2	0.189
Anonsen JH	2	0.189
Antic T	2	0.189
Antoine R	2	0.189
Aprahamian F	2	0.189
Arany Z	2	0.189
Armirotti A	2	0.189
Arnheiter H	2	0.189
Artandi SE	2	0.189
Ashe TD	2	0.189
Auricchio A	2	0.189
Awad O	2	0.189
Back SH	2	0.189
Bai MR	2	0.189
Bajaj L	2	0.189
Balboa E	2	0.189
Ball MW	2	0.189
Banfi S	2	0.189
Bao GD	2	0.189
Beckett P	2	0.189
Beeharry N	2	0.189
Behrens EM	2	0.189
Beltrami AP	2	0.189
Benedetti V	2	0.189
Bertalot G	2	0.189
Bertorelle F	2	0.189
Betz BL	2	0.189
Bhaskar K	2	0.189
Bhatelia K	2	0.189
Bianchi F	2	0.189
Bissa B	2	0.189
Blaauw B	2	0.189
Blanchette P	2	0.189
Bo LY	2	0.189
Boccon-gibod L	2	0.189
Bonaldo P	2	0.189
Bonetti F	2	0.189
Bouche V	2	0.189
Bove J	2	0.189
Bowskill BB	2	0.189
Brady NR	2	0.189
Brattas PL	2	0.189
Bretou M	2	0.189
Brijmohan AS	2	0.189
Brimo F	2	0.189
Brozzi A	2	0.189
Brunetti L	2	0.189
Bruun JA	2	0.189
Bulfoni M	2	0.189
Burton DR	2	0.189
Byun S	2	0.189
Cabello J	2	0.189
Cai JS	2	0.189
Cai WL	2	0.189
Calame K	2	0.189
Calvo R	2	0.189
Cao HJ	2	0.189
Cao LP	2	0.189
Cao WQ	2	0.189
Cao XH	2	0.189
Cao Y	2	0.189
Caragnano A	2	0.189
Caretti A	2	0.189
Carissimo A	2	0.189
Carmona-gutierrez D	2	0.189
Carrella D	2	0.189
Carter HN	2	0.189
Cassady AI	2	0.189
Castro J	2	0.189
Chae HJ	2	0.189
Chakravarty P	2	0.189
Chandra S	2	0.189
Chang ZY	2	0.189
Chau KY	2	0.189
Chen CH	2	0.189
Chen CS	2	0.189
Chen DH	2	0.189
Chen F	2	0.189
Chen HG	2	0.189
Chen JY	2	0.189
Chen M	2	0.189
Chen Q	2	0.189
Chen ST	2	0.189
Chen XC	2	0.189
Chen XM	2	0.189
Chen XQ	2	0.189
Chen XT	2	0.189
Cheng X	2	0.189
Chinnaiyan AM	2	0.189
Cho SJ	2	0.189
Choi H	2	0.189
Choi HS	2	0.189
Choi KC	2	0.189
Choy CH	2	0.189
Chu CC	2	0.189
Chung HT	2	0.189
Cicardi ME	2	0.189
Cirrito JR	2	0.189
Civiletto G	2	0.189
Claude-taupin A	2	0.189
Codogno P	2	0.189
Collins MH	2	0.189
Comperat E	2	0.189
Conrad C	2	0.189
Conte I	2	0.189
Copeland NG	2	0.189
Cortes CJ	2	0.189
Cortez C	2	0.189
Coulomb-l'hermine A	2	0.189
Crippa V	2	0.189
Cristofani R	2	0.189
Cuervo AM	2	0.189
Cui TX	2	0.189
D'orsi L	2	0.189
Da Silva GPD	2	0.189
Dash PK	2	0.189
Dayam RM	2	0.189
De Falco F	2	0.189
De Robertis EM	2	0.189
Debosch BJ	2	0.189
Dehay B	2	0.189
Deng CX	2	0.189
Deng P	2	0.189
Deng Y	2	0.189
Deshpande V	2	0.189
Di Fiore PP	2	0.189
Di Meo D	2	0.189
Di Paola S	2	0.189
Di YT	2	0.189
Diao AP	2	0.189
Dikic I	2	0.189
Dilshat R	2	0.189
Ding HD	2	0.189
Dobrowolski R	2	0.189
Dolezel P	2	0.189
Dong Z	2	0.189
Donohue TM	2	0.189
Douglas PM	2	0.189
Du JL	2	0.189
Duan YQ	2	0.189
Dupont S	2	0.189
Durand S	2	0.189
Dykema KJ	2	0.189
Edagwa B	2	0.189
Egevad L	2	0.189
Eid N	2	0.189
Erdin S	2	0.189
Escudier B	2	0.189
Fang R	2	0.189
Fedele AO	2	0.189
Feng J	2	0.189
Feng W	2	0.189
Ferron M	2	0.189
Fielitz J	2	0.189
Finato N	2	0.189
Fiskesund R	2	0.189
Florey O	2	0.189
Floros J	2	0.189
Fock V	2	0.189
Foretz M	2	0.189
Foroughi L	2	0.189
Forte M	2	0.189
Franco B	2	0.189
Frankel LB	2	0.189
Frati G	2	0.189
Fu C	2	0.189
Fu XX	2	0.189
Fujita T	2	0.189
Funakoshi T	2	0.189
Furge KA	2	0.189
Galbiati M	2	0.189
Galione A	2	0.189
Gao JL	2	0.189
Gao LJ	2	0.189
Gao W	2	0.189
Gao Y	2	0.189
Gatter KC	2	0.189
Gayle S	2	0.189
Gegg M	2	0.189
Gegg ME	2	0.189
Gendelman HE	2	0.189
Gerisch B	2	0.189
Ghazal P	2	0.189
Ghidoni R	2	0.189
Ghimenton C	2	0.189
Ghosh A	2	0.189
Giovagnoli S	2	0.189
Gnanadhas DP	2	0.189
Gonzales E	2	0.189
Gonzalez N	2	0.189
Gorantla S	2	0.189
Goronzy JJ	2	0.189
Gray MA	2	0.189
Grimm C	2	0.189
Gross KW	2	0.189
Grumati P	2	0.189
Gu JX	2	0.189
Gu YX	2	0.189
Gu ZY	2	0.189
Guan JJ	2	0.189
Guan KL	2	0.189
Guo C	2	0.189
Guo DQ	2	0.189
Guo QL	2	0.189
Guo XJ	2	0.189
Guo YH	2	0.189
Gupta NS	2	0.189
Hamacher-brady A	2	0.189
Hamasaki M	2	0.189
Han JH	2	0.189
Han K	2	0.189
Hao EK	2	0.189
Hao L	2	0.189
Hao XJ	2	0.189
Hao ZB	2	0.189
Harada S	2	0.189
Harris AL	2	0.189
Hayashi S	2	0.189
He MD	2	0.189
He Q	2	0.189
He RZ	2	0.189
He Y	2	0.189
He YY	2	0.189
He ZD	2	0.189
Hernandez M	2	0.189
Hicks J	2	0.189
Hodge J	2	0.189
Hoglinger D	2	0.189
Holloway KB	2	0.189
Hooper S	2	0.189
Horibe A	2	0.189
Hozumi I	2	0.189
Hsu CL	2	0.189
Hu B	2	0.189
Hu HX	2	0.189
Hu WT	2	0.189
Hu X	2	0.189
Hu XL	2	0.189
Huan CM	2	0.189
Huang CH	2	0.189
Huang LH	2	0.189
Huang MM	2	0.189
Huang SW	2	0.189
Huang SX	2	0.189
Huang XH	2	0.189
Huang XJ	2	0.189
Huang ZH	2	0.189
Huang ZJ	2	0.189
Hume DA	2	0.189
Hutchinson B	2	0.189
Inden M	2	0.189
Intartaglia D	2	0.189
Ishihara A	2	0.189
Ishikawa Y	2	0.189
Ito T	2	0.189
Ito Y	2	0.189
Jaattela M	2	0.189
Jang J	2	0.189
Jang Y	2	0.189
Janssens GE	2	0.189
Jeney G	2	0.189
Jenkins NA	2	0.189
Jeon SM	2	0.189
Jeong H	2	0.189
Jeong SJ	2	0.189
Jerome WG	2	0.189
Jha A	2	0.189
Jho EH	2	0.189
Ji J	2	0.189
Ji YJ	2	0.189
Jia JY	2	0.189
Jia R	2	0.189
Jian YL	2	0.189
Jiang SB	2	0.189
Jiang YM	2	0.189
Jin FG	2	0.189
Jin PP	2	0.189
Joe Y	2	0.189
Johnson JL	2	0.189
Jung M	2	0.189
Kang S	2	0.189
Karagounis IV	2	0.189
Karim MR	2	0.189
Karsenty G	2	0.189
Karuppan MKM	2	0.189
Katsuno M	2	0.189
Kawakami A	2	0.189
Ke SK	2	0.189
Kelly ML	2	0.189
Kesler SR	2	0.189
Khalifeh S	2	0.189
Khambu B	2	0.189
Khatua AK	2	0.189
Kim C	2	0.189
Kim DH	2	0.189
Kim EK	2	0.189
Kim HJ	2	0.189
Kim JY	2	0.189
Kim M	2	0.189
Kim TS	2	0.189
Kim W	2	0.189
Kim Y	2	0.189
Kinouchi K	2	0.189
Kiselyov K	2	0.189
Komatsu M	2	0.189
Kondo Y	2	0.189
Korolchuk VI	2	0.189
Kou JY	2	0.189
Kuiper RP	2	0.189
Kuo CJ	2	0.189
Kurita H	2	0.189
Kwon JJ	2	0.189
Labed SA	2	0.189
Lamperti C	2	0.189
Landrette S	2	0.189
Lang FF	2	0.189
Lapierre LR	2	0.189
Larue L	2	0.189
Lassen KG	2	0.189
Laurence A	2	0.189
Lawas M	2	0.189
Leduc M	2	0.189
Lee HM	2	0.189
Lee JH	2	0.189
Lee JY	2	0.189
Lee SMY	2	0.189
Lee VMY	2	0.189
Lee YH	2	0.189
Lei YL	2	0.189
Leibovich BC	2	0.189
Lennon-dumenil AM	2	0.189
Lewno MT	2	0.189
Li CC	2	0.189
Li CL	2	0.189
Li HL	2	0.189
Li LH	2	0.189
Li P	2	0.189
Li PL	2	0.189
Li S	2	0.189
Li SM	2	0.189
Li SX	2	0.189
Li T	2	0.189
Li TG	2	0.189
Li WL	2	0.189
Li XC	2	0.189
Li XF	2	0.189
Li YJ	2	0.189
Li YM	2	0.189
Li ZL	2	0.189
Liang H	2	0.189
Liang XY	2	0.189
Liao RY	2	0.189
Lichenstein H	2	0.189
Lidke KA	2	0.189
Lieberman AP	2	0.189
Lim H	2	0.189
Lim JA	2	0.189
Lim YM	2	0.189
Lin J	2	0.189
Lin ZY	2	0.189
Lipinski MM	2	0.189
Liton PB	2	0.189
Liu C	2	0.189
Liu FL	2	0.189
Liu HC	2	0.189
Liu HJ	2	0.189
Liu JL	2	0.189
Liu JY	2	0.189
Liu KY	2	0.189
Liu LH	2	0.189
Liu LX	2	0.189
Liu MM	2	0.189
Liu MY	2	0.189
Liu QM	2	0.189
Liu S	2	0.189
Liu SP	2	0.189
Liu SX	2	0.189
Liu SZ	2	0.189
Liu X	2	0.189
Liu XD	2	0.189
Liu XM	2	0.189
Liu XY	2	0.189
Liu YH	2	0.189
Liu Z	2	0.189
Liv N	2	0.189
Livi U	2	0.189
Lodhi IJ	2	0.189
Lopez-beltran A	2	0.189
Lou HX	2	0.189
Lu G	2	0.189
Lu HX	2	0.189
Lu JN	2	0.189
Lu YH	2	0.189
Lu Z	2	0.189
Luo L	2	0.189
Luo S	2	0.189
Luo SQ	2	0.189
Lv JD	2	0.189
Ma JW	2	0.189
Mackinnon AC	2	0.189
Maeda Y	2	0.189
Mai TY	2	0.189
Majumder S	2	0.189
Malampati S	2	0.189
Mandell MA	2	0.189
Mangala LS	2	0.189
Mao WQ	2	0.189
Mao XD	2	0.189
Martini-stoica H	2	0.189
Masliah E	2	0.189
Matoso A	2	0.189
Mckenna SL	2	0.189
Mclane KE	2	0.189
Mcmillan J	2	0.189
Mcniven MA	2	0.189
Meng S	2	0.189
Meroni M	2	0.189
Messi E	2	0.189
Meyer H	2	0.189
Mialet-perez J	2	0.189
Mingione A	2	0.189
Mischo A	2	0.189
Mlejnek P	2	0.189
Mohwald H	2	0.189
Moller K	2	0.189
Montagner M	2	0.189
Morris K	2	0.189
Morrison BE	2	0.189
Motyckova G	2	0.189
Mozolewski P	2	0.189
Munari E	2	0.189
Mutarelli M	2	0.189
Nagaraja AS	2	0.189
Nagashima Y	2	0.189
Nah J	2	0.189
Nair M	2	0.189
Nakamura K	2	0.189
Napolitano F	2	0.189
Nascimbeni AC	2	0.189
Nasehi M	2	0.189
Neale G	2	0.189
Nelvagal HR	2	0.189
Netto G	2	0.189
Niu HM	2	0.189
Nnah IC	2	0.189
Oehme I	2	0.189
Ogmundsdottir MH	2	0.189
Oh GT	2	0.189
Ohashi T	2	0.189
Ohnishi K	2	0.189
Okamoto K	2	0.189
Ostrowski MC	2	0.189
Osunkoya AO	2	0.189
Oudard S	2	0.189
Ouimet M	2	0.189
Pacher P	2	0.189
Pak SC	2	0.189
Palanisamy N	2	0.189
Pallikkuth S	2	0.189
Palmer D	2	0.189
Pan HY	2	0.189
Pan J	2	0.189
Pan ST	2	0.189
Pang L	2	0.189
Pang Y	2	0.189
Papadopoulos C	2	0.189
Parent LA	2	0.189
Parini A	2	0.189
Park CR	2	0.189
Park HS	2	0.189
Park JY	2	0.189
Park K	2	0.189
Park S	2	0.189
Park SH	2	0.189
Paroni R	2	0.189
Pastore A	2	0.189
Paulus GLC	2	0.189
Pece S	2	0.189
Pehote G	2	0.189
Peng C	2	0.189
Peng PP	2	0.189
Peng Y	2	0.189
Pereira FA	2	0.189
Perez R	2	0.189
Perlmutter DH	2	0.189
Peters RS	2	0.189
Peterziel H	2	0.189
Petit CS	2	0.189
Petri R	2	0.189
Petrov JG	2	0.189
Phinney B	2	0.189
Piccolella M	2	0.189
Pierorazio PM	2	0.189
Pietrocola F	2	0.189
Pircs K	2	0.189
Pivari F	2	0.189
Platt FM	2	0.189
Ploper D	2	0.189
Poletti A	2	0.189
Polishchuk RS	2	0.189
Polito VA	2	0.189
Ponpuak M	2	0.189
Popik W	2	0.189
Pradeep S	2	0.189
Prajapati P	2	0.189
Prehn JHM	2	0.189
Prescott A	2	0.189
Proud CG	2	0.189
Qi YY	2	0.189
Qian J	2	0.189
Qian QW	2	0.189
Qin J	2	0.189
Qin R	2	0.189
Qin RY	2	0.189
Rah SY	2	0.189
Ramadass M	2	0.189
Reggiori F	2	0.189
Rehli M	2	0.189
Ren L	2	0.189
Ren YX	2	0.189
Ricketts CJ	2	0.189
Ridinger J	2	0.189
Rioux-leclercq N	2	0.189
Robins DM	2	0.189
Roczniak-ferguson A	2	0.189
Roman CAJ	2	0.189
Romanello V	2	0.189
Romani P	2	0.189
Roperto S	2	0.189
Rothberg J	2	0.189
Roy M	2	0.189
Rubattu S	2	0.189
Rubinsztein DC	2	0.189
Rusmini P	2	0.189
Sabatini DM	2	0.189
Saha PK	2	0.189
Sahai E	2	0.189
Sahoo N	2	0.189
Sakai E	2	0.189
Saleeb RM	2	0.189
Salemi M	2	0.189
Salierno FG	2	0.189
Salma N	2	0.189
Santin Y	2	0.189
Saqcena C	2	0.189
Sarkar S	2	0.189
Sasai M	2	0.189
Sassone-corsi P	2	0.189
Sato T	2	0.189
Savini M	2	0.189
Schapira AHV	2	0.189
Schepens M	2	0.189
Schindl R	2	0.189
Schirone L	2	0.189
Schmidt T	2	0.189
Schober R	2	0.189
Schoenmakers EFPM	2	0.189
Seok S	2	0.189
Sergin I	2	0.189
Seymour ML	2	0.189
Shao LN	2	0.189
Shao R	2	0.189
Shen K	2	0.189
Shi MH	2	0.189
Shi Q	2	0.189
Shi XH	2	0.189
Shi Y	2	0.189
Shi ZC	2	0.189
Shimabukuro-demoto S	2	0.189
Shimada Y	2	0.189
Shirakabe A	2	0.189
Shukla S	2	0.189
Siegel PM	2	0.189
Sigmund CD	2	0.189
Signorelli P	2	0.189
Silverberg D	2	0.189
Silverman GA	2	0.189
Silveyra P	2	0.189
Simon AK	2	0.189
Sinagra G	2	0.189
Singh K	2	0.189
Singh N	2	0.189
Singh S	2	0.189
Sirci F	2	0.189
Sivridis E	2	0.189
Slade L	2	0.189
Smith SC	2	0.189
Sobue G	2	0.189
Son J	2	0.189
Song DQ	2	0.189
Song E	2	0.189
Song JS	2	0.189
Song Y	2	0.189
Song ZQ	2	0.189
Sood AK	2	0.189
Sopher BL	2	0.189
Srigley JR	2	0.189
Sripada L	2	0.189
Storch S	2	0.189
Su HX	2	0.189
Sukov WR	2	0.189
Sun J	2	0.189
Sun JJ	2	0.189
Sun PM	2	0.189
Sun S	2	0.189
Sun W	2	0.189
Sun XD	2	0.189
Sun XJ	2	0.189
Sun Y	2	0.189
Sung GJ	2	0.189
Surh YJ	2	0.189
Sutton MN	2	0.189
Swartzlander DB	2	0.189
Taguchi K	2	0.189
Takabatake Y	2	0.189
Talbot WS	2	0.189
Tan DC	2	0.189
Tan JQ	2	0.189
Tan LY	2	0.189
Tan XF	2	0.189
Tan Y	2	0.189
Tanaka Y	2	0.189
Tang CZ	2	0.189
Tang K	2	0.189
Tang Q	2	0.189
Tao J	2	0.189
Tao ZT	2	0.189
Tapia PJ	2	0.189
Taubert S	2	0.189
Tavernarakis N	2	0.189
Tessarollo L	2	0.189
Thieme K	2	0.189
Thijssen J	2	0.189
Thompson RH	2	0.189
Tian JW	2	0.189
Tickoo SK	2	0.189
Tokumura A	2	0.189
Tong L	2	0.189
Tong MM	2	0.189
Tortola CP	2	0.189
Townley DM	2	0.189
Toyama-sorimachi N	2	0.189
Trpkov K	2	0.189
True L	2	0.189
Tse DY	2	0.189
Tsukuba T	2	0.189
Tsutsui H	2	0.189
Tsvetkov AS	2	0.189
Tu MY	2	0.189
Tykodi SS	2	0.189
Udager AM	2	0.189
Uemura K	2	0.189
Ugolino J	2	0.189
Unuma K	2	0.189
Uzor NE	2	0.189
Vaccari T	2	0.189
Valenti V	2	0.189
Van Kessel AG	2	0.189
Vargas SO	2	0.189
Vecchione C	2	0.189
Vila M	2	0.189
Viscomi C	2	0.189
Volpe M	2	0.189
Waldherr L	2	0.189
Wanderlingh LG	2	0.189
Wang CX	2	0.189
Wang D	2	0.189
Wang H	2	0.189
Wang HB	2	0.189
Wang JF	2	0.189
Wang JJ	2	0.189
Wang LS	2	0.189
Wang LY	2	0.189
Wang MX	2	0.189
Wang N	2	0.189
Wang QY	2	0.189
Wang WD	2	0.189
Wang WY	2	0.189
Wang YC	2	0.189
Wang YS	2	0.189
Wang YX	2	0.189
Wefel JS	2	0.189
Wegrzyn G	2	0.189
Wei PF	2	0.189
Wei X	2	0.189
Wei ZP	2	0.189
Weihl CC	2	0.189
Wen L	2	0.189
Weyand CM	2	0.189
White MA	2	0.189
Witt O	2	0.189
Wollenberg AC	2	0.189
Wu J	2	0.189
Wu JC	2	0.189
Wu MY	2	0.189
Wu PL	2	0.189
Wu SM	2	0.189
Wu X	2	0.189
Wu XH	2	0.189
Xavier RJ	2	0.189
Xia DJ	2	0.189
Xiang M	2	0.189
Xiao J	2	0.189
Xiao X	2	0.189
Xiao YY	2	0.189
Xie L	2	0.189
Xing Z	2	0.189
Xu H	2	0.189
Xu HD	2	0.189
Xu HE	2	0.189
Xu JY	2	0.189
Xu LD	2	0.189
Xu NG	2	0.189
Xu SJ	2	0.189
Xu XL	2	0.189
Xu YF	2	0.189
Xu Z	2	0.189
Xue X	2	0.189
Yang C	2	0.189
Yang CL	2	0.189
Yang G	2	0.189
Yang HL	2	0.189
Yang LM	2	0.189
Yang M	2	0.189
Yang P	2	0.189
Yang PY	2	0.189
Yang XF	2	0.189
Yang XP	2	0.189
Yang Y	2	0.189
Yao H	2	0.189
Yao P	2	0.189
Ye SF	2	0.189
Yin GJ	2	0.189
Yin J	2	0.189
Yin MX	2	0.189
Yin WW	2	0.189
Yin Y	2	0.189
Yoo JS	2	0.189
Yoon G	2	0.189
Yoshida N	2	0.189
You ZY	2	0.189
Yu B	2	0.189
Yu HL	2	0.189
Yu T	2	0.189
Yue JB	2	0.189
Zangrossi M	2	0.189
Zanlungo S	2	0.189
Zare H	2	0.189
Zarrindast MR	2	0.189
Zeng QX	2	0.189
Zeviani M	2	0.189
Zhai PY	2	0.189
Zhan Y	2	0.189
Zhang B	2	0.189
Zhang CH	2	0.189
Zhang CL	2	0.189
Zhang CY	2	0.189
Zhang HN	2	0.189
Zhang JH	2	0.189
Zhang R	2	0.189
Zhang RF	2	0.189
Zhang RS	2	0.189
Zhang SY	2	0.189
Zhang TZ	2	0.189
Zhang WK	2	0.189
Zhang XF	2	0.189
Zhang XP	2	0.189
Zhang YW	2	0.189
Zhang YY	2	0.189
Zhao BZ	2	0.189
Zhao CL	2	0.189
Zhao GZ	2	0.189
Zhao K	2	0.189
Zhao P	2	0.189
Zhao T	2	0.189
Zhao YJ	2	0.189
Zhao YY	2	0.189
Zheng FH	2	0.189
Zheng G	2	0.189
Zheng M	2	0.189
Zheng XD	2	0.189
Zheng YH	2	0.189
Zheng ZL	2	0.189
Zhou Y	2	0.189
Zhu A	2	0.189
Zhu L	2	0.189
Zhu LL	2	0.189
Zhu XF	2	0.189
Zoncu R	2	0.189
Zulueta A	2	0.189
Abbas MN	1	0.094
Abbe P	1	0.094
Abdallah DM	1	0.094
Abdel-nour M	1	0.094
Abdelmohsen UR	1	0.094
Abe K	1	0.094
Abe S	1	0.094
Abeti R	1	0.094
Abildgaard MH	1	0.094
Abokyi S	1	0.094
Abraham RT	1	0.094
Abrahamian C	1	0.094
Abrams CS	1	0.094
Abuirqeba H	1	0.094
Acosta K	1	0.094
Acs G	1	0.094
Adelaiye-ogala R	1	0.094
Adeniran A	1	0.094
Adeniran AJ	1	0.094
Adhikari B	1	0.094
Adhikari M	1	0.094
Adiliaghdam F	1	0.094
Aebersold R	1	0.094
Aerts JM	1	0.094
Aerts JMFG	1	0.094
Afink GB	1	0.094
Afman LA	1	0.094
Agholme L	1	0.094
Agrawal A	1	0.094
Aguilera-romero A	1	0.094
Aguzzi A	1	0.094
Aharoni A	1	0.094
Ahmad Z	1	0.094
Ahmann GJ	1	0.094
Ahmed I	1	0.094
Ahmed K	1	0.094
Ahmed KA	1	0.094
Ahmed M	1	0.094
Ahmed Z	1	0.094
Ahn JW	1	0.094
Ahn KJ	1	0.094
Ahn YO	1	0.094
Ahsan A	1	0.094
Ahuja N	1	0.094
Ai NN	1	0.094
Akahane T	1	0.094
Akayama S	1	0.094
Akbari O	1	0.094
Akcay A	1	0.094
Ake A	1	0.094
Akerblom M	1	0.094
Aki S	1	0.094
Akl EW	1	0.094
Aksentijevic D	1	0.094
Al Mamun A	1	0.094
Al-ahmadie HA	1	0.094
Al-khodor S	1	0.094
Al-saadi R	1	0.094
Al-saleem T	1	0.094
Alahari S	1	0.094
Alamri AH	1	0.094
Albanese F	1	0.094
Albert R	1	0.094
Alberts AS	1	0.094
Albi E	1	0.094
Alcorn JF	1	0.094
Aldera AP	1	0.094
Aleksieva N	1	0.094
Alesi N	1	0.094
Ali S	1	0.094
Alirezaei M	1	0.094
Alizadeh R	1	0.094
Allaf M	1	0.094
Allaf ME	1	0.094
Alldred MJ	1	0.094
Allegri G	1	0.094
Almaspour MB	1	0.094
Alnouti Y	1	0.094
Altomare D	1	0.094
Alumets J	1	0.094
Alvarez AR	1	0.094
Alvarez-mon M	1	0.094
Alvarez-mon MA	1	0.094
Alves AMF	1	0.094
Alvino FG	1	0.094
Amabile A	1	0.094
Ambrosetti D	1	0.094
Amiel J	1	0.094
Amin A	1	0.094
Amin M	1	0.094
Amirouche A	1	0.094
Amit M	1	0.094
Ammanathan V	1	0.094
Amon A	1	0.094
An N	1	0.094
An XX	1	0.094
An YK	1	0.094
An YP	1	0.094
Anantharam V	1	0.094
Anchoori RK	1	0.094
Andeen NK	1	0.094
Andersen JK	1	0.094
Andersen LL	1	0.094
Anderson KC	1	0.094
Ando R	1	0.094
Andrade-souza VA	1	0.094
Andrews NC	1	0.094
Andrews S	1	0.094
Andric SA	1	0.094
Angarola B	1	0.094
Angeletti S	1	0.094
Ankrum JA	1	0.094
Annunziata I	1	0.094
Anthony K	1	0.094
Aoki I	1	0.094
Appelqvist H	1	0.094
Appleton BA	1	0.094
Araki W	1	0.094
Araki Y	1	0.094
Arcila ME	1	0.094
Arcoverde L	1	0.094
Arden C	1	0.094
Argmann CA	1	0.094
Arguello G	1	0.094
Arhzaouy K	1	0.094
Arko-mensah J	1	0.094
Armeni T	1	0.094
Armenta IDL	1	0.094
Armstrong A	1	0.094
Arnold-schrauf C	1	0.094
Arnthorsson AO	1	0.094
Aroian RV	1	0.094
Arora S	1	0.094
Arotcarena ML	1	0.094
Arreguin-espinosa R	1	0.094
Arroyo JD	1	0.094
Arsenault D	1	0.094
Asadi S	1	0.094
Asadi Z	1	0.094
Asaka Y	1	0.094
Asakawa Y	1	0.094
Aschner M	1	0.094
Asensio CS	1	0.094
Ashkenazi A	1	0.094
Ashrafi K	1	0.094
Askjaer P	1	0.094
Asrani K	1	0.094
Astanina E	1	0.094
Asunsolo A	1	0.094
Aten J	1	0.094
Au J	1	0.094
Aubert S	1	0.094
Audet-walsh E	1	0.094
Ausman J	1	0.094
Aversa Z	1	0.094
Avitahl N	1	0.094
Awad AS	1	0.094
Ayerbe-algaba R	1	0.094
Ayyadevara S	1	0.094
Azmi AS	1	0.094
Azzariti A	1	0.094
Azzolini M	1	0.094
Babcock K	1	0.094
Baboota S	1	0.094
Baccarani U	1	0.094
Bade AN	1	0.094
Bader DA	1	0.094
Bae JW	1	0.094
Bae SH	1	0.094
Baek SH	1	0.094
Bagley D	1	0.094
Bahar I	1	0.094
Bahreyni A	1	0.094
Bai J	1	0.094
Bai L	1	0.094
Bai LJ	1	0.094
Bai QL	1	0.094
Bai X	1	0.094
Bai Y	1	0.094
Bai YZ	1	0.094
Baid N	1	0.094
Baik J	1	0.094
Bailey JC	1	0.094
Baird D	1	0.094
Bajalovic N	1	0.094
Bajory Z	1	0.094
Bajpai G	1	0.094
Baker RE	1	0.094
Bakke O	1	0.094
Baksi S	1	0.094
Balabanov S	1	0.094
Balaska K	1	0.094
Balasubramaniam M	1	0.094
Balce DR	1	0.094
Baldassari F	1	0.094
Baldi P	1	0.094
Ballard ET	1	0.094
Ballard H	1	0.094
Ballesteros-alvarez J	1	0.094
Ballotti R	1	0.094
Balmanno K	1	0.094
Balse E	1	0.094
Ban JQ	1	0.094
Banecki B	1	0.094
Bao B	1	0.094
Bao JP	1	0.094
Bao JT	1	0.094
Bao LL	1	0.094
Bao PH	1	0.094
Bao T	1	0.094
Bao W	1	0.094
Bao WL	1	0.094
Barbier L	1	0.094
Barcella M	1	0.094
Barcena JA	1	0.094
Barchiesi A	1	0.094
Bardeesy N	1	0.094
Barger PM	1	0.094
Barger SW	1	0.094
Barnes E	1	0.094
Barnes K	1	0.094
Baron O	1	0.094
Barres B	1	0.094
Barriere G	1	0.094
Barteczko L	1	0.094
Bartek J	1	0.094
Barthelemy P	1	0.094
Bassel-duby R	1	0.094
Bassell GJ	1	0.094
Batchu N	1	0.094
Batchu SN	1	0.094
Bates GP	1	0.094
Batlevi Y	1	0.094
Bauckman KA	1	0.094
Bauvy C	1	0.094
Bayer H	1	0.094
Beaumont M	1	0.094
Bechade PA	1	0.094
Becin AP	1	0.094
Beck WHJ	1	0.094
Beckel JM	1	0.094
Becker E	1	0.094
Becker SM	1	0.094
Becot A	1	0.094
Bedford L	1	0.094
Bedugnis AS	1	0.094
Beese CJ	1	0.094
Behrends C	1	0.094
Behrens D	1	0.094
Bei ZC	1	0.094
Bekassy AN	1	0.094
Belaud-rotureau MA	1	0.094
Bell SM	1	0.094
Bellen HJ	1	0.094
Bellomo F	1	0.094
Belougne J	1	0.094
Belov GA	1	0.094
Beltrami A	1	0.094
Beltrami CA	1	0.094
Bembi B	1	0.094
Ben Shlomo S	1	0.094
Benelli D	1	0.094
Beninca C	1	0.094
Benit P	1	0.094
Benitez R	1	0.094
Benjamin D	1	0.094
Benjamin IJ	1	0.094
Bennett CF	1	0.094
Bensalah K	1	0.094
Bento CF	1	0.094
Berdyshev EV	1	0.094
Berg MJ	1	0.094
Bergin IL	1	0.094
Bergman P	1	0.094
Bergmann M	1	0.094
Bergsagel PL	1	0.094
Berguig GY	1	0.094
Bernacchia G	1	0.094
Bernard EM	1	0.094
Berridge G	1	0.094
Berry-kravis E	1	0.094
Berthon P	1	0.094
Berti A	1	0.094
Bertolotto C	1	0.094
Bertoni APS	1	0.094
Bertozzi S	1	0.094
Bertuzzi R	1	0.094
Bessadottir M	1	0.094
Besson A	1	0.094
Bewersdorf J	1	0.094
Beyer K	1	0.094
Beyfuss K	1	0.094
Bezard E	1	0.094
Bezu L	1	0.094
Bhagyaraj E	1	0.094
Bhanshali F	1	0.094
Bhasin MK	1	0.094
Bhasin SS	1	0.094
Bhatracharyya NP	1	0.094
Bhattarai KR	1	0.094
Bhatti F	1	0.094
Bhaumik D	1	0.094
Bhutto IA	1	0.094
Bi W	1	0.094
Bi YL	1	0.094
Bian F	1	0.094
Biasutto L	1	0.094
Bicciato S	1	0.094
Bigot A	1	0.094
Bilen MA	1	0.094
Bille K	1	0.094
Billemont B	1	0.094
Binder JL	1	0.094
Bindesboll C	1	0.094
Bingel C	1	0.094
Binkle L	1	0.094
Biondini M	1	0.094
Bis-brewer DM	1	0.094
Bishop DJ	1	0.094
Biswal MR	1	0.094
Biswal S	1	0.094
Biswas A	1	0.094
Biswas C	1	0.094
Biswas D	1	0.094
Biton A	1	0.094
Bittmann A	1	0.094
Bitto A	1	0.094
Bjedov I	1	0.094
Bjorklund A	1	0.094
Blaak EE	1	0.094
Blais K	1	0.094
Blakemore JL	1	0.094
Blanca A	1	0.094
Blanchet F	1	0.094
Blaser S	1	0.094
Blazquez L	1	0.094
Blennow K	1	0.094
Blessing AM	1	0.094
Bloehdorn J	1	0.094
Blomenkamp K	1	0.094
Bluemke A	1	0.094
Blum JS	1	0.094
Blumer JB	1	0.094
Bocci T	1	0.094
Bochenska K	1	0.094
Bodokh Y	1	0.094
Boeckers T	1	0.094
Boekschoten MV	1	0.094
Bogner-strauss JG	1	0.094
Boileve A	1	0.094
Boisvert FM	1	0.094
Boivin-welch M	1	0.094
Bojko A	1	0.094
Bolanos JP	1	0.094
Bollig-fischer A	1	0.094
Bollu LR	1	0.094
Bompas E	1	0.094
Bonanno JA	1	0.094
Bondar VV	1	0.094
Bonder EM	1	0.094
Bone NB	1	0.094
Bonert M	1	0.094
Bonhenry D	1	0.094
Bonifacino JS	1	0.094
Bonn F	1	0.094
Bonora M	1	0.094
Boonen M	1	0.094
Boorjian SA	1	0.094
Boot RG	1	0.094
Booth LN	1	0.094
Boppana VS	1	0.094
Borchard S	1	0.094
Borchiellini D	1	0.094
Borden KLB	1	0.094
Bordi M	1	0.094
Borgia D	1	0.094
Borner C	1	0.094
Bortolozzi A	1	0.094
Bosse D	1	0.094
Botas J	1	0.094
Bottai D	1	0.094
Bottino AMS	1	0.094
Bouchard EL	1	0.094
Boucher MJ	1	0.094
Boudi A	1	0.094
Boukhali M	1	0.094
Bourdenx M	1	0.094
Bourgeois A	1	0.094
Bouthillier J	1	0.094
Boutry M	1	0.094
Bouvier R	1	0.094
Bovey R	1	0.094
Bowman AB	1	0.094
Boya P	1	0.094
Boyd DD	1	0.094
Boyd JR	1	0.094
Boyle D	1	0.094
Braccia C	1	0.094
Bracher F	1	0.094
Bracher L	1	0.094
Bradfute SB	1	0.094
Braggio E	1	0.094
Braicu EL	1	0.094
Branchu J	1	0.094
Branzovsky J	1	0.094
Braulke T	1	0.094
Brecht L	1	0.094
Brekken RA	1	0.094
Bremner L	1	0.094
Brenner H	1	0.094
Brenner SE	1	0.094
Brentnall TA	1	0.094
Brezesinski G	1	0.094
Brice A	1	0.094
Bridge J	1	0.094
Bridge JA	1	0.094
Bridges B	1	0.094
Briken V	1	0.094
Brix DM	1	0.094
Brodsky K	1	0.094
Bronova I	1	0.094
Brooke JP	1	0.094
Brooks CR	1	0.094
Brooks JSJ	1	0.094
Brooks SV	1	0.094
Brosch R	1	0.094
Brothwell JA	1	0.094
Brown D	1	0.094
Brown JD	1	0.094
Brown N	1	0.094
Brown RA	1	0.094
Browne CM	1	0.094
Browning V	1	0.094
Brownlee DM	1	0.094
Brucia K	1	0.094
Bruckman RS	1	0.094
Bruiners N	1	0.094
Bruins LA	1	0.094
Brumell JH	1	0.094
Brunt KR	1	0.094
Bryan MR	1	0.094
Bryant-genevier M	1	0.094
Bryk R	1	0.094
Bryleva EY	1	0.094
Brynjolfsdottir SH	1	0.094
Bu LL	1	0.094
Bu XJ	1	0.094
Bubacco L	1	0.094
Bucala R	1	0.094
Bucci C	1	0.094
Bucha S	1	0.094
Buchner M	1	0.094
Buck E	1	0.094
Buckberry S	1	0.094
Budhe SR	1	0.094
Budka JA	1	0.094
Buechner S	1	0.094
Buehler D	1	0.094
Buimer M	1	0.094
Bujan J	1	0.094
Bultot L	1	0.094
Bunge MB	1	0.094
Buratti E	1	0.094
Burchett JM	1	0.094
Burdo TH	1	0.094
Burnaevskiy N	1	0.094
Burns C	1	0.094
Burton TD	1	0.094
Busch T	1	0.094
Busi I	1	0.094
Buss JH	1	0.094
Bussani R	1	0.094
Busschaert N	1	0.094
Bussolino F	1	0.094
Butler VJ	1	0.094
Buyuk Y	1	0.094
Byun JK	1	0.094
Caballero B	1	0.094
Cabillic F	1	0.094
Cabiscol E	1	0.094
Cabrero IA	1	0.094
Cacicedo JM	1	0.094
Caetano L	1	0.094
Cafferata EA	1	0.094
Cagnetta A	1	0.094
Cahill MR	1	0.094
Cai AL	1	0.094
Cai CZ	1	0.094
Cai DM	1	0.094
Cai HB	1	0.094
Cai HM	1	0.094
Cai JY	1	0.094
Cai QY	1	0.094
Cai SH	1	0.094
Cajaiba MM	1	0.094
Caldwell GA	1	0.094
Caldwell KA	1	0.094
Calimeri T	1	0.094
Callot C	1	0.094
Camardo J	1	0.094
Camera DM	1	0.094
Campanella M	1	0.094
Campbell GR	1	0.094
Campochiaro PA	1	0.094
Campos Y	1	0.094
Camussi G	1	0.094
Canan S	1	0.094
Candinas D	1	0.094
Canete-portillo S	1	0.094
Cangi MG	1	0.094
Caniggia I	1	0.094
Cantarero L	1	0.094
Canti C	1	0.094
Cantley LC	1	0.094
Cao C	1	0.094
Cao H	1	0.094
Cao HY	1	0.094
Cao J	1	0.094
Cao LN	1	0.094
Cao M	1	0.094
Cao N	1	0.094
Cao Q	1	0.094
Cao ST	1	0.094
Cao WX	1	0.094
Cao XY	1	0.094
Cao YG	1	0.094
Cao YL	1	0.094
Caparros PA	1	0.094
Capel H	1	0.094
Capuozzo A	1	0.094
Carbone F	1	0.094
Cardellach F	1	0.094
Cardone M	1	0.094
Carella R	1	0.094
Carey KL	1	0.094
Carlo MI	1	0.094
Carr CS	1	0.094
Carra S	1	0.094
Carrella A	1	0.094
Carromeu C	1	0.094
Carskadon S	1	0.094
Carzaniga R	1	0.094
Cas MD	1	0.094
Casey CA	1	0.094
Casey G	1	0.094
Cash D	1	0.094
Cassano T	1	0.094
Cassereau J	1	0.094
Cassidy H	1	0.094
Castells J	1	0.094
Castillo-quan JI	1	0.094
Castro-obregon S	1	0.094
Catoi C	1	0.094
Cattaneo E	1	0.094
Cavazza A	1	0.094
Cea M	1	0.094
Cecchini K	1	0.094
Cedazo-minguez A	1	0.094
Cedolini C	1	0.094
Ceglia N	1	0.094
Cen J	1	0.094
Cen L	1	0.094
Cen XF	1	0.094
Cenacchi G	1	0.094
Cereda C	1	0.094
Cerino P	1	0.094
Cerratoa G	1	0.094
Cerutti R	1	0.094
Cervantes M	1	0.094
Cervellin C	1	0.094
Cesonyte I	1	0.094
Cha BS	1	0.094
Chabaud M	1	0.094
Chai JC	1	0.094
Chai JY	1	0.094
Chai SS	1	0.094
Chai YG	1	0.094
Chalasani N	1	0.094
Chan CB	1	0.094
Chan CK	1	0.094
Chan CS	1	0.094
Chan H	1	0.094
Chan HHL	1	0.094
Chan L	1	0.094
Chan MTV	1	0.094
Chan TF	1	0.094
Chan-seng-yue M	1	0.094
Chance MR	1	0.094
Chand HS	1	0.094
Chander P	1	0.094
Chandra V	1	0.094
Chang CC	1	0.094
Chang CCY	1	0.094
Chang J	1	0.094
Chang JT	1	0.094
Chang JZ	1	0.094
Chang L	1	0.094
Chang MH	1	0.094
Chang PKY	1	0.094
Chang RX	1	0.094
Chang SF	1	0.094
Chang SH	1	0.094
Chang TS	1	0.094
Chang TY	1	0.094
Charest-morin X	1	0.094
Charles P	1	0.094
Charli A	1	0.094
Charveriat M	1	0.094
Chatelet DS	1	0.094
Chau BN	1	0.094
Chaudhury A	1	0.094
Chauhan D	1	0.094
Chauhan N	1	0.094
Chauss D	1	0.094
Chavalmane AK	1	0.094
Chavan H	1	0.094
Che SL	1	0.094
Che XH	1	0.094
Che Y	1	0.094
Cheatham AM	1	0.094
Chebib I	1	0.094
Checler F	1	0.094
Chen B	1	0.094
Chen CJ	1	0.094
Chen CK	1	0.094
Chen CZ	1	0.094
Chen DG	1	0.094
Chen DY	1	0.094
Chen HD	1	0.094
Chen HN	1	0.094
Chen HY	1	0.094
Chen HZ	1	0.094
Chen JF	1	0.094
Chen JX	1	0.094
Chen LK	1	0.094
Chen LQ	1	0.094
Chen LW	1	0.094
Chen MY	1	0.094
Chen PH	1	0.094
Chen QH	1	0.094
Chen R	1	0.094
Chen SA	1	0.094
Chen SC	1	0.094
Chen SD	1	0.094
Chen SN	1	0.094
Chen SW	1	0.094
Chen SX	1	0.094
Chen TC	1	0.094
Chen TZ	1	0.094
Chen WY	1	0.094
Chen XP	1	0.094
Chen XW	1	0.094
Chen YC	1	0.094
Chen YJ	1	0.094
Chen YL	1	0.094
Chen YM	1	0.094
Chen YQ	1	0.094
Chen YX	1	0.094
Chen YY	1	0.094
Chen Z	1	0.094
Chen ZD	1	0.094
Chen ZF	1	0.094
Cheng CD	1	0.094
Cheng D	1	0.094
Cheng DC	1	0.094
Cheng FR	1	0.094
Cheng GH	1	0.094
Cheng J	1	0.094
Cheng LX	1	0.094
Cheng R	1	0.094
Cheng SB	1	0.094
Cheng WW	1	0.094
Cheng XP	1	0.094
Cheng XS	1	0.094
[truncated: 4,843 more rows]

## Sheet: co-cited authors
Year	count	co-cited authors
663	2011	SETTEMBRE C
418	2011	SARDIELLO M
298	2013	MARTINA JA
271	2013	ROCZNIAK-FERGUSON A
264	2012	MEDINA DL
221	2013	PALMIERI M
194	2011	MIZUSHIMA N
160	2017	NAPOLITANO G
158	2013	KLIONSKY DJ
102	2014	DECRESSAC M
97	2003	ARGANI P
92	2014	PASTORE N
92	2011	LEVINE B
89	2012	PENA-LLOPIS S
80	2017	LI Y
79	2013	TSUNEMI T
78	1998	STEINGRIMSSON E
77	2011	SANCAK Y
71	2014	KIM J
66	2004	KUIPER RP
64	2012	ZONCU R
61	2017	RABEN N
60	2019	PUERTOLLANO R
60	2015	POLITO VA
59	2005	DAVIS IJ
59	2014	KABEYA Y
58	2013	KOMATSU M
57	2014	SONG WS
57	2016	PERERA R
57	2017	MARTINI-STOICA H
56	2012	RUBINSZTEIN DC
52	2014	NIXON RA
48	2014	SPAMPANATO C
47	2017	MANSUETO G
46	2014	LAPIERRE LR
45	2013	KIMURA S
44	2012	DEHAY B
43	2016	XIAO QL
43	2016	NEZICH CL
42	2016	CORTES CJ
41	2013	BAR-PELED L
40	2013	SINGH R
40	2016	VISVIKIS O
39	2013	LAPLANTE M
39	2018	ZHANG Y
37	1999	HEMESATH TJ
36	2014	FERRON M
36	2018	DI MALTA C
36	2012	YU L
36	2015	ZHOU J
36	2012	INOKI K
34	2015	FULLGRABE J
33	2016	PLOPER D
32	2019	CHAO XJ
32	2014	LUZIO JP
32	2019	LI L
32	2018	GALLUZZI L
32	2013	SAFTIG P
31	2016	CHAUHAN S
31	2017	KAUFFMAN EC
30	2018	VEGA-RUBIN-DE-CELIS S
30	2015	MA XC
30	2015	BJORKOY G
29	2010	BOYA P
28	2013	SARKAR S
28	2011	HE CC
28	2010	CUERVO AM
26	2013	OROURKE EJ
25	2019	SERGIN I
25	2019	EVANS TD
25	2011	MARTIGNONI G
25	2014	KROEMER G
24	2014	ESKELINEN EL
24	2019	PERERA RM
23	2016	EMANUEL R
22	2020	LAWRENCE RE
22	2019	LU HC
22	2019	ZHANG JB
20	2009	CAMPARO P
19	2009	BALLABIO A
19	2019	YOUNG NP
19	2017	KILPATRICK K
19	2016	GIATROMANOLAKI A
19	2018	SAXTON RA
19	2020	SONG JX
19	2020	NAKAMURA S
19	2014	EFEYAN A
19	2017	KIM S
19	1991	CARR CS
18	2018	LEVY JMM
17	2019	FAN YB
17	2019	KIM SH
17	2020	BRADY OA
16	2020	RUSMINI P
16	2020	WANG Y
16	2015	MALOUF GG
16	2014	LEE JH
16	2020	ZHITOMIRSKY B
16	2016	ZHANG XL
16	1991	BECKMANN H
16	2016	SHEN HM
15	2015	WHITE E
14	2003	CLARK J
14	2019	WANG J
14	2020	SLADE L
14	2017	LEE J
14	2015	MARCHAND B
14	2020	XU Y
13	2015	APPELQVIST H
13	2017	RAO Q
13	2020	WANG L
13	2020	MAUTHE M
13	2013	RAVIKUMAR B
13	2014	YAMAMOTO A
13	2015	RABINOWITZ JD
13	2018	WILLIAMSON SR
13	2019	LI J
13	2019	SHA YB
13	2017	SHIN HJR
13	2013	LIEBERMAN AP
13	2019	ZHANG L
12	2019	LIU J
12	2020	DIKIC I
12	2018	NI HM
12	1992	FISHER DE
12	2016	SAMIE M
12	2019	ZHANG J
11	2017	PANKIV S
11	2012	BOLAND B
11	2011	WONG E
11	2018	GUPTA S
11	2019	ESKELINEN EEVA-LIISA
11	2019	WANG WY
10	2017	KOROLCHUK VI
10	1999	WEILBAECHER KN
10	2016	KAUSHIK S
10	2016	THOREEN CC
10	2011	GELLER JI
10	2012	ZHONG MH
10	2012	INAMURA K
10	2018	LI X
10	2016	ZHANG XJ
10	2017	GHOSH A
10	2015	SRIGLEY JR
10	2018	DING WX
10	2015	SMITH NE
10	2006	REHLI M
10	2019	GODAR RJ
9	2009	PECCIARINI L
9	2016	DERETIC V
9	2021	ZHENG G
9	2016	XU HX
9	2018	CHEN Y
9	2003	WETERMAN MAJ
9	2011	HORA M
9	2017	HANSEN M
9	2016	WANG XJ
9	2016	PARR C
8	2021	LOVE MI
8	2020	YANG M
8	2019	YANG L
8	2021	WANG H
8	2020	[ANONYMOUS]
8	2021	WANG CS
8	2015	HONG SB
8	1999	HODGKINSON CA
8	2021	ZHANG WH
8	2021	SHEN DB
8	2015	GREEN WM
8	2015	JEWELL JL
7	2021	LIU YY
7	2003	WIDLUND HR
7	2021	DOBIN A
7	1999	ROMAN C
7	2008	BRUDER E
7	2019	HARDIE DG
7	2021	LIM H
7	2001	AKSAN I
7	2021	KIM D
7	2020	HUANG J
6	2019	WANG SY
6	2021	KIM KH
6	2021	CHANDRA S
6	2017	GUTIERREZ MG
6	2005	ALTINOK G
6	2021	LI YJ
6	2019	LIVAK KJ
6	2019	SCIARRETTA S
6	2021	WANG K
6	2019	PIETROCOLA F
6	1995	ARTANDI SE
6	2003	LADANYI M
6	2021	LI M
6	2021	ZHANG Z
6	2019	ZHANG X
6	2020	SAITOH T
6	2019	ZHANG XZ
6	2003	SIDHAR SK
6	2021	CHEN X
6	2020	CHEN W
6	2021	LEEMAN DS
6	2021	ZHANG H
6	2021	SHEN K
6	2016	TANIDA I
6	2021	BRAY F
5	2020	WANG SG
5	2018	KLEIN K
5	2019	PI HF
5	2019	PALIKARAS K
5	2018	PETERSSON F
5	2018	MOCH H
5	2018	PECKOVA K
5	2019	DORIA A
5	2015	HAQ R
5	2003	MCGILL GG
5	2020	LIU B
5	2020	SCHINDELIN J
5	2016	MOSKOT M
5	2019	LIU K
5	2020	JIA JY
5	2019	IVANKOVIC D
5	2021	HERZIG S
5	2021	GLICK D
5	2020	SIEGEL RL
5	2019	WANG X
5	2011	DONG XP
5	2020	KAIZUKA T
5	2005	VERASTEGUI C
5	2020	ABU-REMAILEH M
5	2021	KLIOSNKY D
5	2017	LINEHAN WM
5	2018	NABAR NR
5	2019	TRIVEDI PC
5	2018	LIN J
5	2020	KUMAR S
5	2019	LI H
5	2020	ITAKURA E
5	2019	MORSELLI E
5	2016	GUAN J
5	2020	BAJAJ L
5	2017	EGAN DF
5	2021	BAO JT
5	2019	CIECHANOVER A
5	2019	MARINO G
5	2011	KOMAI Y
5	2020	MATHEW R
5	2021	KIMURA T
4	2016	AITS S
4	1999	ZHAO GQ
4	2018	LILLEBY WOLFGANG
4	2017	REDDY A
4	2017	TANIDA ISEI
4	2012	SUAREZ-VILELA D
4	2003	HEIMANN P
4	2018	DURINCK S
4	2016	MAUVEZIN C
4	2012	ZHAN HQ
4	2017	AMARAVADI RK
4	2018	CLASSE M
4	2016	SIDRANSKY E
4	2014	LIPINSKI MM
4	2017	MACHER-GOEPPINGER S
4	1994	DANG CV
4	2017	RUSSELL RC
4	2018	JUNG CH
4	2007	TOMLINSON GE
4	2017	TANAKA M
4	1991	BLACKWELL TK
4	2016	HUAN CM
4	1994	AYER DE
4	2016	MARTINEZ-VICENTE M
4	1994	FERREDAMARE AR
4	1994	AMATI B
4	2016	CHUA JP
4	2016	JAGER S
4	2018	FEHRENBACHER N
4	2018	KIM YC
4	2005	MANSKY KC
4	2018	KAUR J
4	2017	LEE JM
4	1991	BLACKWOOD EM
4	2017	FRAKE RA
4	2015	YUE ZY
4	2017	KLATTE T
4	2008	RAMPHAL R
4	2016	NARENDRA D
4	2016	TERMAN A
4	2004	WU M
4	2006	RENSHAW AA
3	2012	MARTIGIONI G
3	1992	CAI MJ
3	2013	PATARD JJ
3	2015	DEDUVE C
3	2015	ELLIS CL
3	2015	FENG YC
3	2014	HOSOKAWA N
3	2013	URBANELLI LORENA
3	2014	HARRIS H
3	2014	MUELLER-STEINER S
3	2014	YANG DS
3	2014	HARDY J
3	2013	SHEN SS
3	2014	PLATT FM
3	2015	DIBBLE CC
3	2014	KORNFELD S
3	2015	IWAI-KANAI E
3	2014	SUBRAMANIAN A
3	2014	FUTERMAN AH
3	2014	DOI H
3	2003	DIJKHUIZEN T
3	2013	JACINTO E
3	2014	ALERS S
3	1999	AMAE S
3	2015	GARRAWAY LA
3	2013	REPNIK U
3	2015	HUANG DW
3	1999	BENTLEY NJ
3	2013	LUBKE T
3	2013	KIM E
3	2013	YANG ZF
3	2013	YU YH
3	2014	COEN K
2	2011	MOTYCKOVA G
2	2013	EBLE JN
2	1991	CHODOSH LA
2	1995	BARBAS SM
2	2007	KOVACS G
2	1992	ANTHONYCAHILL SJ
2	2007	TONK V
2	2004	HALLSSON JH
2	2003	GURU SC
2	2000	ALEXANDER AE
2	2012	DEPHOURE N
2	2001	GLASS CK
2	2007	VANDENBERG E
2	2005	AUBERT J
2	2005	DU JY
2	2012	CHEN RQ
2	2001	DE CESARE D
2	2008	CARCAO MD
2	2008	PEROT C
2	1999	YASUMOTO K
2	2001	YING LH
2	2011	KAELIN WG
2	2011	FRALDI A
2	2013	BRUNELLI M
2	2011	MEYER PN
2	1994	OSHEA EK
2	1998	ATCHLEY WR
2	2011	KOIE T
2	2013	ASHBURNER M
2	2008	LAE M
2	2000	ADAM NK
2	2008	TSUDA M
2	2001	SIGMUND CD
2	1999	BERTOLOTTO C
2	2001	YAN Y
2	2006	GIANGRANDE PH
2	2008	SELLE B
2	2005	CHANG KL
2	1998	ANDREWS NC
2	2005	ADELMAN DM
2	2003	EVANS MJ
2	2011	RAIS-BAHRAMI S
2	1999	SATO S
2	2006	HUA XX
2	1994	GREGOR PD
2	2001	PETROVIC N
2	2012	HSU PP
2	1999	MOORE KJ
2	2013	ADLEY BP
2	2012	CHOO AY
2	1994	MURRE C
2	2013	BRENNER S
2	2012	FELDMAN ME
2	2012	HERMAN JG
2	2013	DELAHUNT B
2	2011	LAPLANTE JM
2	2007	MITELMAN F
2	2011	FORGAC M
2	2000	CHOMCZYNSKI P
2	2003	VAN ASSELDONK M
2	2006	HERSHEY CL
2	1994	ELLENBERGER TE
2	1991	BENEZRA R
2	2008	HUANG FS
2	2001	SHI Q
2	2005	PRICE ER
2	2005	TACHIBANA M
2	2013	COX TM
2	1999	ROSS IL
2	2000	BARNETT MK
2	2003	BODMER D
2	2008	MELONI AM
2	1994	LANDSCHULZ WH
2	2008	DAL CIN P
2	2012	BRONISZ A
1	2009	BJORNSSON J
1	1995	COUREY AJ
1	2004	*CHIN AC SCI
1	2010	AHARON-PERETZ J
1	2004	ADAMS MD
1	1992	DEPINHO RA
1	1991	BODNER M
1	1998	BACH MA
1	2004	ALTSCHUL SF
1	1998	BAKER RK
1	2000	BARBER JI
1	1992	BAKER RA
1	2009	BLOOM DA
1	1993	BAKER RE
1	2010	CHU CT
1	1998	BELL GI
1	1996	AUSUBEL FM
1	2010	ANGLADE P
1	2009	CATALDO AM
1	1994	BAIROCH A
1	2006	ALLAN JM
1	2000	ARRINGTON CH
1	1993	BEGLEY CG
1	1993	BRADFORD MM
1	2002	AIHARA M
1	1991	CARTHEW RW
1	1995	CLACKSON T
1	1996	AMIN C
1	2004	*JIANGS NEW MED CO
1	2001	BELLORINI M
1	1996	ARAI N
1	2006	*AM JOINT COMM CAN
1	2002	ARANGO NA
1	2006	AHLGREN U
1	1991	CLERC RG
1	2010	CASTINO R
1	2001	ANDERSON DM
1	2004	ALTSCHMIED J
1	1992	GARTENBERG MR
1	1993	BATTEY J
1	2002	BEHRINGER RR
1	1994	AKIRA S
1	1994	BAX A
1	2002	BARTHELEMY C
1	2008	ANANTHAN J
1	1999	AKAGAWA KS
1	1995	BARBAS CF
1	1994	ALBERTI S
1	1996	BARRETT J
1	2002	BAARENDS WM
1	1995	CHAKRABARTTY A
1	1996	ANDERSON ME
1	1996	ABARZUA P
1	1996	BANKS L
1	2002	COUSE JF
1	2008	AHMED K
1	2010	BARRACHINA M
1	2007	BAKALL B
1	2002	DAIRAGHI DJ
1	2010	CHU YP
1	1996	BISCHOFF JR
1	1993	ARUFFO A
1	1993	BRAUN T
1	1995	CHOTHIA C
1	2008	ACHARYYA S
1	2002	CIELINSKI MJ
1	1991	BALDWIN AS
1	1991	BURGLIN TR
1	2001	BIBO AM
1	1993	BRAM RJ
1	2000	*MNDO
1	1995	DAVIES DR
1	2001	ALS-NIELSEN J
1	1993	BLANAR MA
1	2005	AMIT M
1	2009	CHILOSI M
1	2010	CHEN YQ
1	1991	CANTOR CR
1	2007	AGATEP R
1	2009	AMIN MB
1	1992	EPHRUSSI A
1	2009	BENDISKE J
1	2002	AMIEL J
1	2002	BAO B
1	2004	ANTEQUERA F
1	2005	AUDA-BOUCHER G

## Sheet: Top 10 most cited articles
Title	Authors	Source Title	Publication Date	Publication Year	Volume	Issue	Beginning Page	Ending Page	DOI	Total Citations	2009	2010	2011	2012	2013	2014	2015	2016	2017	2018	2019	2020	2021
TFEB Links Autophagy to Lysosomal Biogenesis	Settembre, Carmine; Di Malta, Chiara; Polito, Vinicia Assunta; Garcia-Arencibia, Moises; Vetrini, Francesco; Erdin, Serkan; Erdin, Serpil Uckac; Huynh, Tuong; Medina, Diego; Colella, Pasqualina; Sardiello, Marco; Rubinsztein, David C.; Ballabio, Andrea	SCIENCE	JUN 17 2011	2011	332	6036	1429	1433	10.1126/science.1204592	1649	0	0	18	46	71	107	130	160	181	173	241	270	252
A Gene Network Regulating Lysosomal Biogenesis and Function	Sardiello, Marco; Palmieri, Michela; di Ronza, Alberto; Medina, Diego Luis; Valenza, Marta; Gennarino, Vincenzo Alessandro; Di Malta, Chiara; Donaudy, Francesca; Embrione, Valerio; Polishchuk, Roman S.; Banfi, Sandro; Parenti, Giancarlo; Cattaneo, Elena; Ballabio, Andrea	SCIENCE	JUL 24 2009	2009	325	5939	473	477	10.1126/science.1174447	1315	6	22	36	52	62	73	93	127	134	148	172	205	185
A lysosome-to-nucleus signalling mechanism senses and regulates the lysosome via mTOR and TFEB	Settembre, Carmine; Zoncu, Roberto; Medina, Diego L.; Vetrini, Francesco; Erdin, Serkan; Erdin, SerpilUckac; Tuong Huynh; Ferron, Mathieu; Karsenty, Gerard; Vellard, Michel C.; Facchinetti, Valeria; Sabatini, David M.; Ballabio, Andrea	EMBO JOURNAL	MAR 7 2012	2012	31	5	1095	1108	10.1038/emboj.2012.32	1042	0	0	0	12	52	57	84	120	131	123	149	156	158
The Transcription Factor TFEB Links mTORC1 Signaling to Transcriptional Control of Lysosome Homeostasis	Roczniak-Ferguson, Agnes; Petit, Constance S.; Froehlich, Florian; Qian, Sharon; Ky, Jennifer; Angarola, Brittany; Walther, Tobias C.; Ferguson, Shawn M.	SCIENCE SIGNALING	JUN 12 2012	2012	5	228			10.1126/scisignal.2002790	692	0	0	0	1	22	25	55	70	99	97	107	112	104
MTORC1 functions as a transcriptional regulator of autophagy by preventing nuclear transport of TFEB	Martina, Jose A.; Chen, Yong; Gucek, Marjan; Puertollano, Rosa	AUTOPHAGY	JUN 2012	2012	8	6	903	914	10.4161/auto.19653	625	0	0	0	1	19	26	44	63	63	83	101	107	118
Lysosomal calcium signalling regulates autophagy through calcineurin and TFEB	Medina, Diego L.; Di Paola, Simone; Peluso, Ivana; Armani, Andrea; De Stefani, Diego; Venditti, Rossella; Montefusco, Sandro; Scotto-Rosato, Anna; Prezioso, Carolina; Forrester, Alison; Settembre, Carmine; Wang, Wuyang; Gao, Qiong; Xu, Haoxing; Sandri, Marco; Rizzuto, Rosario; De Matteis, Maria Antonietta; Ballabio, Andrea	NATURE CELL BIOLOGY	MAR 2015	2015	17	3	288	+	10.1038/ncb3114	607	0	0	0	0	0	0	13	75	83	85	97	127	127
TFEB controls cellular lipid metabolism through a starvation-induced autoregulatory loop	Settembre, Carmine; De Cegli, Rossella; Mansueto, Gelsomina; Saha, Pradip K.; Vetrini, Francesco; Visvikis, Orane; Tuong Huynh; Carissimo, Annamaria; Palmer, Donna; Klisch, Tiemo Juergen; Wollenberg, Amanda C.; Di Bernardo, Diego; Chan, Lawrence; Irazoqui, Javier E.; Ballabio, Andrea	NATURE CELL BIOLOGY	JUN 2013	2013	15	6	647	+	10.1038/ncb2718	526	0	0	0	0	11	41	34	55	64	64	77	81	99
Pathogenic Lysosomal Depletion in Parkinson's Disease	Dehay, Benjamin; Bove, Jordi; Rodriguez-Muela, Natalia; Perier, Celine; Recasens, Ariadna; Boya, Patricia; Vila, Miquel	JOURNAL OF NEUROSCIENCE	SEP 15 2010	2010	30	37	12535	12544	10.1523/JNEUROSCI.1920-10.2010	493	0	0	22	36	46	35	43	60	36	39	55	57	64
Characterization of the CLEAR network reveals an integrated control of cellular clearance pathways	Palmieri, Michela; Impey, Soren; Kang, Hyojin; di Ronza, Alberto; Pelz, Carl; Sardiello, Marco; Ballabio, Andrea	HUMAN MOLECULAR GENETICS	OCT 1 2011	2011	20	19	3852	3866	10.1093/hmg/ddr306	488	0	0	2	10	19	30	26	47	56	58	69	69	102
Transcriptional control of autophagy-lysosome function drives pancreatic cancer metabolism	Perera, RushikaM.; Stoykova, Svetlana; Nicolay, Brandon N.; Ross, Kenneth N.; Fitamant, Julien; Boukhali, Myriam; Lengrand, Justine; Deshpande, Vikram; Selig, Martin K.; Ferrone, Cristina R.; Settleman, Jeff; Stephanopoulos, Gregory; Dyson, Nicholas J.; Zoncu, Roberto; Ramaswamy, Sridhar; Haas, Wilhelm; Bardeesy, Nabeel	NATURE	AUG 20 2015	2015	524	7565	361	U251	10.1038/nature14587	426	0	0	0	0	0	0	7	60	55	56	83	78	87

## Sheet: co-cited references
Year	count	co-cited references
2011	353	Settembre C, 2011, SCIENCE, V332, P1429, DOI 10.1126/science.1204592
2012	300	Settembre C, 2012, EMBO J, V31, P1095, DOI 10.1038/emboj.2012.32
2012	237	Roczniak-Ferguson A, 2012, SCI SIGNAL, V5, P0, DOI 10.1126/scisignal.2002790
2012	184	Martina JA, 2012, AUTOPHAGY, V8, P903, DOI 10.4161/auto.19653
2015	180	Medina DL, 2015, NAT CELL BIOL, V17, P288, DOI 10.1038/ncb3114
2013	179	Settembre C, 2013, NAT CELL BIOL, V15, P647, DOI 10.1038/ncb2718
2009	174	Sardiello M, 2009, SCIENCE, V325, P473, DOI 10.1126/science.1174447
2013	131	Settembre C, 2013, NAT REV MOL CELL BIO, V14, P283, DOI 10.1038/nrm3565
2016	129	Napolitano G, 2016, J CELL SCI, V129, P2475, DOI 10.1242/jcs.146365
2011	121	Palmieri M, 2011, HUM MOL GENET, V20, P3852, DOI 10.1093/hmg/ddr306
2013	96	Decressac M, 2013, P NATL ACAD SCI USA, V110, P0, DOI 10.1073/pnas.1305623110
2011	94	Medina DL, 2011, DEV CELL, V21, P421, DOI 10.1016/j.devcel.2011.07.016
2014	88	Martina JA, 2014, SCI SIGNAL, V7, P0, DOI 10.1126/scisignal.2004754
2013	74	Martina JA, 2013, J CELL BIOL, V200, P475, DOI 10.1083/jcb.201209135
2011	69	Pena-Llopis S, 2011, EMBO J, V30, P3242, DOI 10.1038/emboj.2011.257
2016	68	Klionsky DJ, 2016, AUTOPHAGY, V12, P1, DOI 10.1080/15548627.2015.1100356
2018	60	Puertollano R, 2018, EMBO J, V37, P0, DOI 10.15252/embj.201798804
2014	60	Polito VA, 2014, EMBO MOL MED, V6, P1142, DOI 10.15252/emmm.201303671
2015	57	Perera R, 2015, NATURE, V524, P361, DOI 10.1038/nature14587
2017	57	Palmieri M, 2017, NAT COMMUN, V8, P0, DOI 10.1038/ncomms14338
2016	52	Li Y, 2016, NAT CELL BIOL, V18, P1065, DOI 10.1038/ncb3407
2016	52	Martini-Stoica H, 2016, TRENDS NEUROSCI, V39, P221, DOI 10.1016/j.tins.2016.02.002
2013	52	Spampanato C, 2013, EMBO MOL MED, V5, P691, DOI 10.1002/emmm.201202176
2012	52	Tsunemi T, 2012, SCI TRANSL MED, V4, P0, DOI 10.1126/scitranslmed.3003799
2016	51	Pastore N, 2016, AUTOPHAGY, V12, P1240, DOI 10.1080/15548627.2016.1179405
2016	50	Raben N, 2016, ANNU REV CELL DEV BI, V32, P255, DOI 10.1146/annurev-cellbio-111315-125407
2011	49	Zoncu R, 2011, SCIENCE, V334, P678, DOI 10.1126/science.1207056
2017	47	Mansueto G, 2017, CELL METAB, V25, P182, DOI 10.1016/j.cmet.2016.11.003
2016	46	Martina JA, 2016, EMBO J, V35, P479, DOI 10.15252/embj.201593428
2014	44	Visvikis O, 2014, IMMUNITY, V40, P896, DOI 10.1016/j.immuni.2014.05.002
2011	43	Settembre C, 2011, AUTOPHAGY, V7, P1379, DOI 10.4161/auto.7.11.17166
2015	43	Nezich CL, 2015, J CELL BIOL, V210, P435, DOI 10.1083/jcb.201501002
2013	41	Lapierre LR, 2013, NAT COMMUN, V4, P0, DOI 10.1038/ncomms3267
2010	39	Sancak Y, 2010, CELL, V141, P290, DOI 10.1016/j.cell.2010.02.024
2015	34	Xiao QL, 2015, J NEUROSCI, V35, P12137, DOI 10.1523/JNEUROSCI.0705-15.2015
2014	34	Kauffman EC, 2014, NAT REV UROL, V11, P465, DOI 10.1038/nrurol.2014.162
2013	32	ORourke EJ, 2013, NAT CELL BIOL, V15, P668, DOI 10.1038/ncb2741
2013	31	Song WS, 2013, HUM MOL GENET, V22, P1994, DOI 10.1093/hmg/ddt052
2013	31	Zhou J, 2013, CELL RES, V23, P508, DOI 10.1038/cr.2013.11
2013	31	Ferron M, 2013, GENE DEV, V27, P955, DOI 10.1101/gad.213827.113
2018	30	Napolitano G, 2018, NAT COMMUN, V9, P0, DOI 10.1038/s41467-018-05862-6
2018	29	Chao XJ, 2018, GASTROENTEROLOGY, V155, P865, DOI 10.1053/j.gastro.2018.05.027
2017	29	Vega-Rubin-de-Celis S, 2017, AUTOPHAGY, V13, P464, DOI 10.1080/15548627.2016.1271514
2010	28	Mizushima N, 2010, CELL, V140, P313, DOI 10.1016/j.cell.2010.01.028
2010	26	Dehay B, 2010, J NEUROSCI, V30, P12535, DOI 10.1523/JNEUROSCI.1920-10.2010
2017	25	Sergin I, 2017, NAT COMMUN, V8, P0, DOI 10.1038/ncomms15750
2014	24	Xiao QL, 2014, J NEUROSCI, V34, P9607, DOI 10.1523/JNEUROSCI.3788-13.2014
2017	24	Di Malta C, 2017, SCIENCE, V356, P1188, DOI 10.1126/science.aag2553
2012	24	Bar-Peled L, 2012, CELL, V150, P1196, DOI 10.1016/j.cell.2012.07.032
2011	23	Kim J, 2011, NAT CELL BIOL, V13, P132, DOI 10.1038/ncb2152
2012	22	Laplante M, 2012, CELL, V149, P274, DOI 10.1016/j.cell.2012.03.017
2014	22	Emanuel R, 2014, ARTERIOSCL THROM VAS, V34, P1942, DOI 10.1161/ATVBAHA.114.303342
2015	22	Settembre C, 2015, METHOD CELL BIOL, V126, P45, DOI 10.1016/bs.mcb.2014.11.011
2016	21	Sardiello M, 2016, ANN NY ACAD SCI, V1371, P3, DOI 10.1111/nyas.13131
2012	21	Argani P, 2012, AM J SURG PATHOL, V36, P1516, DOI 10.1097/PAS.0b013e3182613d8f
2017	21	Lu HC, 2017, SCI SIGNAL, V10, P0, DOI 10.1126/scisignal.aah4214
2015	21	Argani P, 2015, SEMIN DIAGN PATHOL, V32, P103, DOI 10.1053/j.semdp.2015.02.003
2015	20	Ploper D, 2015, P NATL ACAD SCI USA, V112, P0, DOI 10.1073/pnas.1424576112
2015	20	Giatromanolaki A, 2015, LUNG CANCER, V90, P98, DOI 10.1016/j.lungcan.2015.07.008
2008	20	Camparo P, 2008, AM J SURG PATHOL, V32, P656, DOI 10.1097/PAS.0b013e3181609914
2008	20	Sancak Y, 2008, SCIENCE, V320, P1496, DOI 10.1126/science.1157535
2005	20	Argani P, 2005, AM J SURG PATHOL, V29, P230, DOI 10.1097/01.pas.0000146007.54092.37
2014	20	Martina JA, 2014, CELL MOL LIFE SCI, V71, P2483, DOI 10.1007/s00018-014-1565-8
2018	19	Brady OA, 2018, AUTOPHAGY, V14, P181, DOI 10.1080/15548627.2017.1313943
2019	19	Cortes CJ, 2019, NEUROBIOL DIS, V122, P83, DOI 10.1016/j.nbd.2018.05.012
2015	19	Kilpatrick K, 2015, PLOS ONE, V10, P0, DOI 10.1371/journal.pone.0120819
2016	19	Young NP, 2016, GENE DEV, V30, P535, DOI 10.1101/gad.274142.115
2016	18	Perera RM, 2016, ANNU REV CELL DEV BI, V32, P223, DOI 10.1146/annurev-cellbio-111315-125125
2013	18	Nixon RA, 2013, NAT MED, V19, P983, DOI 10.1038/nm.3232
2017	18	Levy JMM, 2017, NAT REV CANCER, V17, P528, DOI 10.1038/nrc.2017.53
2014	18	Song WS, 2014, J BIOL CHEM, V289, P10211, DOI 10.1074/jbc.M113.506246
2014	18	Cortes CJ, 2014, NAT NEUROSCI, V17, P1180, DOI 10.1038/nn.3787
2017	18	Saxton RA, 2017, CELL, V168, P960
2003	17	Kuiper RP, 2003, HUM MOL GENET, V12, P1661, DOI 10.1093/hmg/ddg178
2018	17	Fan YB, 2018, CIRC RES, V122, P945, DOI 10.1161/CIRCRESAHA.118.312672
2016	17	Argani P, 2016, AM J SURG PATHOL, V40, P1484, DOI 10.1097/PAS.0000000000000720
2013	17	Appelqvist H, 2013, J MOL CELL BIOL, V5, P214, DOI 10.1093/jmcb/mjt022
2011	17	Mizushima N, 2011, CELL, V147, P728, DOI 10.1016/j.cell.2011.10.026
2017	17	Sha YB, 2017, EMBO J, V36, P2544, DOI 10.15252/embj.201796699
2019	16	Rusmini P, 2019, AUTOPHAGY, V15, P631, DOI 10.1080/15548627.2018.1535292
2012	16	Klionsky DJ, 2012, AUTOPHAGY, V8, P445, DOI 10.4161/auto.19496
2015	16	Wang WY, 2015, P NATL ACAD SCI USA, V112, P0, DOI 10.1073/pnas.1419669112
2019	16	Lawrence RE, 2019, NAT CELL BIOL, V21, P133, DOI 10.1038/s41556-018-0244-7
2016	16	Zhang JB, 2016, ONCOTARGET, V7, P75659, DOI 10.18632/oncotarget.12318
2014	15	Shen HM, 2014, TRENDS BIOCHEM SCI, V39, P61, DOI 10.1016/j.tibs.2013.12.001
2012	15	Inamura K, 2012, AM J SURG PATHOL, V36, P35, DOI 10.1097/PAS.0b013e3182293ec3
2009	15	He CC, 2009, ANNU REV GENET, V43, P67, DOI 10.1146/annurev-genet-102808-114910
2007	15	Argani P, 2007, AM J SURG PATHOL, V31, P1149, DOI 10.1097/PAS.0b013e318031ffff
2013	14	Pastore N, 2013, EMBO MOL MED, V5, P397, DOI 10.1002/emmm.201202046
2017	14	Kim SH, 2017, AUTOPHAGY, V13, P1767, DOI 10.1080/15548627.2017.1356977
2014	14	Smith NE, 2014, AM J SURG PATHOL, V38, P604, DOI 10.1097/PAS.0000000000000203
2017	14	Pastore N, 2017, EMBO MOL MED, V9, P605, DOI 10.15252/emmm.201607204
2008	14	Levine B, 2008, CELL, V132, P27, DOI 10.1016/j.cell.2007.12.018
2003	14	Davis IJ, 2003, P NATL ACAD SCI USA, V100, P6051, DOI 10.1073/pnas.0931430100
2015	13	Marchand B, 2015, J BIOL CHEM, V290, P5592, DOI 10.1074/jbc.M114.616714
2015	13	Xu HX, 2015, ANNU REV PHYSIOL, V77, P57, DOI 10.1146/annurev-physiol-021014-071649
2018	13	Mauthe M, 2018, AUTOPHAGY, V14, P1435, DOI 10.1080/15548627.2018.1474314
2013	13	Chauhan S, 2013, MOL CELL, V50, P16, DOI 10.1016/j.molcel.2013.01.024
2016	13	Shin HJR, 2016, NATURE, V534, P553, DOI 10.1038/nature18014
2016	12	Song JX, 2016, AUTOPHAGY, V12, P1372, DOI 10.1080/15548627.2016.1179404
2014	12	Love MI, 2014, GENOME BIOL, V15, P0, DOI 10.1186/s13059-014-0550-8
2013	12	Srigley JR, 2013, AM J SURG PATHOL, V37, P1469, DOI 10.1097/PAS.0b013e318299f2d1
2008	12	Mizushima N, 2008, NATURE, V451, P1069, DOI 10.1038/nature06639
2016	12	Argani P, 2016, AM J SURG PATHOL, V40, P723, DOI 10.1097/PAS.0000000000000631
2012	12	Parr C, 2012, MOL CELL BIOL, V32, P4410, DOI 10.1128/MCB.00930-12
2015	12	Ploper D, 2015, PHARMACOL RES, V99, P36, DOI 10.1016/j.phrs.2015.04.006
2009	12	Saftig P, 2009, NAT REV MOL CELL BIO, V10, P623, DOI 10.1038/nrm2745
2001	12	Argani P, 2001, AM J PATHOL, V158, P2089, DOI 10.1016/S0002-9440(10)64680-9
2009	11	Martignoni G, 2009, MODERN PATHOL, V22, P1016, DOI 10.1038/modpathol.2009.58
2018	11	Martina JA, 2018, J BIOL CHEM, V293, P12525, DOI 10.1074/jbc.RA118.003471
2016	11	Zhang XZ, 2016, NAT COMMUN, V7, P0, DOI 10.1038/ncomms10938
2015	11	Durinck S, 2015, NAT GENET, V47, P13, DOI 10.1038/ng.3146
2017	11	Slade L, 2017, MOL CANCER RES, V15, P1637, DOI 10.1158/1541-7786.MCR-17-0320
2001	11	Argani P, 2001, AM J PATHOL, V159, P179, DOI 10.1016/S0002-9440(10)61684-7
2009	11	Sardiello M, 2009, CELL CYCLE, V8, P4021, DOI 10.4161/cc.8.24.10263
2013	11	Dobin A, 2013, BIOINFORMATICS, V29, P15, DOI 10.1093/bioinformatics/bts635
1990	11	CARR CS, 1990, MOL CELL BIOL, V10, P4384, DOI 10.1128/MCB.10.8.4384
2014	11	Bar-Peled L, 2014, TRENDS CELL BIOL, V24, P400, DOI 10.1016/j.tcb.2014.03.003
2018	11	Evans TD, 2018, AUTOPHAGY, V14, P724, DOI 10.1080/15548627.2018.1434373
2017	10	Argani P, 2017, AM J SURG PATHOL, V41, P655, DOI 10.1097/PAS.0000000000000835
2012	10	Rao Q, 2012, AM J SURG PATHOL, V36, P1327, DOI 10.1097/PAS.0b013e31825aafb5
2006	10	Argani P, 2006, J CLIN ONCOL, V24, P1529, DOI 10.1200/JCO.2005.04.4693
2019	10	Liu YY, 2019, AUTOPHAGY, V15, P493, DOI 10.1080/15548627.2018.1531196
2015	10	Samie M, 2015, NAT IMMUNOL, V16, P729, DOI 10.1038/ni.3196
2014	10	Fullgrabe J, 2014, NAT REV MOL CELL BIO, V15, P65, DOI 10.1038/nrm3716
2015	10	Godar RJ, 2015, AUTOPHAGY, V11, P1537, DOI 10.1080/15548627.2015.1063768
2019	10	Di Malta C, 2019, FRONT CELL DEV BIOL, V7, P0, DOI 10.3389/fcell.2019.00114
2002	10	Steingrimsson E, 2002, P NATL ACAD SCI USA, V99, P4477, DOI 10.1073/pnas.072071099
2010	10	Yu L, 2010, NATURE, V465, P942, DOI 10.1038/nature09076
2018	10	Dikic I, 2018, NAT REV MOL CELL BIO, V19, P349, DOI 10.1038/s41580-018-0003-4
2003	10	Argani P, 2003, AM J SURG PATHOL, V27, P750, DOI 10.1097/00000478-200306000-00005
2015	9	Ma XC, 2015, MOL CELL BIOL, V35, P956, DOI 10.1128/MCB.01091-14
2011	9	Zoncu R, 2011, NAT REV MOL CELL BIO, V12, P21, DOI 10.1038/nrm3025
2012	9	Lieberman AP, 2012, AUTOPHAGY, V8, P719, DOI 10.4161/auto.19469
2013	9	Doria A, 2013, NEW ENGL J MED, V368, P1845
2007	9	Pecciarini L, 2007, GENE CHROMOSOME CANC, V46, P419, DOI 10.1002/gcc.20422
2019	9	Bajaj L, 2019, J NEUROCHEM, V148, P573, DOI 10.1111/jnc.14564
2019	8	Evans TD, 2019, SCI SIGNAL, V12, P0, DOI 10.1126/scisignal.aau2281
2015	8	Aits S, 2015, AUTOPHAGY, V11, P1408, DOI 10.1080/15548627.2015.1063871
2015	8	Ghosh A, 2015, J BIOL CHEM, V290, P10309, DOI 10.1074/jbc.M114.610659
2005	8	Argani P, 2005, CLIN LAB MED, V25, P363, DOI 10.1016/j.cll.2005.01.008
2017	8	Williamson SR, 2017, AM J SURG PATHOL, V41, P287, DOI 10.1097/PAS.0000000000000776
2017	8	Gupta S, 2017, MODERN PATHOL, V30, P998, DOI 10.1038/modpathol.2017.24
2016	8	Zhang XL, 2016, NAT COMMUN, V7, P0, DOI 10.1038/ncomms12109
2011	8	Suarez-Vilela D, 2011, INT J SURG PATHOL, V19, P506, DOI 10.1177/1066896909340531
2009	8	Huang DW, 2009, NAT PROTOC, V4, P44, DOI 10.1038/nprot.2008.211
2020	8	Zhang WH, 2020, CELL DEATH DISCOV, V6, P0, DOI 10.1038/s41420-020-0265-4
2013	8	Green WM, 2013, AM J SURG PATHOL, V37, P1150, DOI 10.1097/PAS.0b013e31828a69ae
2009	8	Singh R, 2009, NATURE, V458, P1131, DOI 10.1038/nature07976
2002	8	Argani P, 2002, AM J SURG PATHOL, V26, P1553, DOI 10.1097/00000478-200212000-00003
2015	8	Kaur J, 2015, NAT REV MOL CELL BIO, V16, P461, DOI 10.1038/nrm4024
2019	8	Levine B, 2019, CELL, V176, P11, DOI 10.1016/j.cell.2018.09.048
2010	8	Rabinowitz JD, 2010, SCIENCE, V330, P1344, DOI 10.1126/science.1193497
2012	7	He CC, 2012, NATURE, V481, P511, DOI 10.1038/nature10758
2018	7	Li L, 2018, NAT COMMUN, V9, P0, DOI 10.1038/s41467-018-04849-7
2020	7	Nakamura S, 2020, NAT CELL BIOL, V22, P1252, DOI 10.1038/s41556-020-00583-9
2011	7	Singh R, 2011, CELL METAB, V13, P495, DOI 10.1016/j.cmet.2011.04.004
2008	7	Boya P, 2008, ONCOGENE, V27, P6434, DOI 10.1038/onc.2008.310
2003	7	Argani P, 2003, ONCOGENE, V22, P5374, DOI 10.1038/sj.onc.1206686
1990	7	BECKMANN H, 1990, GENE DEV, V4, P167, DOI 10.1101/gad.4.2.167
2020	7	Ballabio A, 2020, NAT REV MOL CELL BIO, V21, P101, DOI 10.1038/s41580-019-0185-4
2020	7	Napolitano G, 2020, NATURE, V585, P597, DOI 10.1038/s41586-020-2444-0
2017	7	Wang CS, 2017, NAT COMMUN, V8, P0, DOI 10.1038/s41467-017-02332-3
2018	7	Lim H, 2018, NAT COMMUN, V9, P0, DOI 10.1038/s41467-018-03939-w
2014	7	Settembre C, 2014, TRENDS CELL BIOL, V24, P743, DOI 10.1016/j.tcb.2014.06.006
2004	6	Steingrimsson E, 2004, ANNU REV GENET, V38, P365, DOI 10.1146/annurev.genet.38.072902.092717
2014	6	Chua JP, 2014, HUM MOL GENET, V23, P1376, DOI 10.1093/hmg/ddt527
2010	6	Argani P, 2010, AM J SURG PATHOL, V34, P1295, DOI 10.1097/PAS.0b013e3181e8ce5b
2018	6	Leeman DS, 2018, SCIENCE, V359, P1277, DOI 10.1126/science.aag3048
2008	6	Geller JI, 2008, CANCER-AM CANCER SOC, V112, P1607, DOI 10.1002/cncr.23331
2018	6	Bray F, 2018, CA-CANCER J CLIN, V68, P394, DOI 10.3322/caac.21492
2001	6	Ladanyi M, 2001, ONCOGENE, V20, P48, DOI 10.1038/sj.onc.1204074
2004	6	Kuiper RP, 2004, NUCLEIC ACIDS RES, V32, P2315, DOI 10.1093/nar/gkh571
2018	6	Zheng G, 2018, CELL DEATH DIS, V9, P0, DOI 10.1038/s41419-018-0909-y
2016	5	Klein K, 2016, INT J ONCOL, V49, P164, DOI 10.3892/ijo.2016.3505
2016	5	Kliosnky D, 2016, AUTOPHAGY, V12, P443, DOI 10.1080/15548627.2016.1147886
2010	5	Argani P, 2010, AM J SURG PATHOL, V34, P1395, DOI 10.1097/PAS.0b013e3181f17ac0
2009	5	Hora M, 2009, INT UROL NEPHROL, V41, P553, DOI 10.1007/s11255-008-9495-8
2009	5	Thoreen CC, 2009, J BIOL CHEM, V284, P8023, DOI 10.1074/jbc.M900301200
2005	5	Altinok G, 2005, PEDIATR DEVEL PATHOL, V8, P168, DOI 10.1007/s10024-004-9106-3
2000	5	Verastegui C, 2000, MOL ENDOCRINOL, V14, P449, DOI 10.1210/me.14.3.449
2016	5	Linehan WM, 2016, NEW ENGL J MED, V374, P135, DOI 10.1056/NEJMoa1505917
1991	5	FISHER DE, 1991, GENE DEV, V5, P2342, DOI 10.1101/gad.5.12a.2342
2020	5	Luo RC, 2020, AUTOPHAGY, V16, P52, DOI 10.1080/15548627.2019.1596488
2018	5	Yu L, 2018, AUTOPHAGY, V14, P207, DOI 10.1080/15548627.2017.1378838
2012	5	Zhong MH, 2012, AM J SURG PATHOL, V36, P654, DOI 10.1097/PAS.0b013e31824f24a6
2019	5	Wang SG, 2019, AUTOPHAGY, V15, P1954, DOI 10.1080/15548627.2019.1596486
2017	5	Moors TE, 2017, MOL NEURODEGENER, V12, P0, DOI 10.1186/s13024-017-0154-3
2008	5	Kim E, 2008, NAT CELL BIOL, V10, P935, DOI 10.1038/ncb1753
2019	5	Lawrence RE, 2019, SCIENCE, V366, P971, DOI 10.1126/science.aax0364
2016	5	Kaizuka T, 2016, MOL CELL, V64, P835, DOI 10.1016/j.molcel.2016.09.037
2015	5	Zhitomirsky B, 2015, ONCOTARGET, V6, P1143, DOI 10.18632/oncotarget.2732
2016	5	Zhitomirsky B, 2016, DRUG RESIST UPDATE, V24, P23, DOI 10.1016/j.drup.2015.11.004
2013	5	Decressac M, 2013, AUTOPHAGY, V9, P1244, DOI 10.4161/auto.25044
2009	5	Grove CA, 2009, CELL, V138, P314, DOI 10.1016/j.cell.2009.04.058
2016	5	Ivankovic D, 2016, J NEUROCHEM, V136, P388, DOI 10.1111/jnc.13412
2009	5	Komai Y, 2009, CLIN CANCER RES, V15, P1170, DOI 10.1158/1078-0432.CCR-08-1183
2014	5	Moskot M, 2014, J BIOL CHEM, V289, P17054, DOI 10.1074/jbc.M114.555300
2012	5	Schindelin J, 2012, NAT METHODS, V9, P676
2016	5	Bao JT, 2016, PROTEIN CELL, V7, P417, DOI 10.1007/s13238-016-0269-2
2014	5	Peckova K, 2014, ANN DIAGN PATHOL, V18, P351, DOI 10.1016/j.anndiagpath.2014.10.002
2019	5	Bonam SR, 2019, NAT REV DRUG DISCOV, V18, P923, DOI 10.1038/s41573-019-0036-1
2010	5	Hong SB, 2010, PLOS ONE, V5, P0, DOI 10.1371/journal.pone.0015793
2014	5	Zhang XJ, 2014, AUTOPHAGY, V10, P588, DOI 10.4161/auto.27710
2016	5	Nakamura S, 2016, NAT COMMUN, V7, P0, DOI 10.1038/ncomms10944
2002	5	McGill GG, 2002, CELL, V109, P707, DOI 10.1016/S0092-8674(02)00762-6
2017	5	Abu-Remaileh M, 2017, SCIENCE, V358, P807, DOI 10.1126/science.aan6298
2014	5	Tiribuzi R, 2014, NEUROBIOL AGING, V35, P345, DOI 10.1016/j.neurobiolaging.2013.08.003
2016	5	Trivedi PC, 2016, BBA-MOL CELL BIOL L, V1861, P1893, DOI 10.1016/j.bbalip.2016.09.004
1998	5	Steingrimsson E, 1998, DEVELOPMENT, V125, P4607
2017	5	Nabar NR, 2017, YALE J BIOL MED, V90, P301
2016	4	Fraldi A, 2016, ANNU REV NEUROSCI, V39, P277, DOI 10.1146/annurev-neuro-070815-014031
2017	4	Fang LM, 2017, ACTA PHARMACOL SIN, V38, P1305, DOI 10.1038/aps.2017.25
2019	4	Siegel RL, 2019, CA-CANCER J CLIN, V69, P7, DOI 10.3322/caac.21551
2018	4	Jia JY, 2018, MOL CELL, V70, P120, DOI 10.1016/j.molcel.2018.03.009
1991	4	BLACKWOOD EM, 1991, SCIENCE, V251, P1211, DOI 10.1126/science.2006410
2018	4	Silvestrini MJ, 2018, CELL REP, V23, P1915, DOI 10.1016/j.celrep.2018.04.063
2018	4	Boland B, 2018, NAT REV DRUG DISCOV, V17, P660, DOI 10.1038/nrd.2018.109
2015	4	Lilleby Wolfgang, 2015, J Med Case Rep, V9, P281, DOI 10.1186/s13256-015-0749-7
2011	4	Haq R, 2011, J CLIN ONCOL, V29, P3474, DOI 10.1200/JCO.2010.32.6223
2017	4	Galluzzi L, 2017, NAT REV DRUG DISCOV, V16, P487, DOI 10.1038/nrd.2017.22
2014	4	Seok S, 2014, NATURE, V516, P108, DOI 10.1038/nature13949
2003	4	Widlund HR, 2003, ONCOGENE, V22, P3035, DOI 10.1038/sj.onc.1206443
2011	4	Egan DF, 2011, SCIENCE, V331, P456, DOI 10.1126/science.1196371
2010	4	Fraldi A, 2010, EMBO J, V29, P3607, DOI 10.1038/emboj.2010.237
2017	4	Pi HF, 2017, SCI REP-UK, V7, P0, DOI 10.1038/srep43466
2008	4	Narendra D, 2008, J CELL BIOL, V183, P795, DOI 10.1083/jcb.200809125
2013	4	Lin CW, 2013, J HEPATOL, V58, P993, DOI 10.1016/j.jhep.2013.01.011
2014	4	Parzych KR, 2014, ANTIOXID REDOX SIGN, V20, P460, DOI 10.1089/ars.2013.5371
1991	4	BECKMANN H, 1991, GENE DEV, V5, P1057, DOI 10.1101/gad.5.6.1057
2007	4	Luzio JP, 2007, NAT REV MOL CELL BIO, V8, P622, DOI 10.1038/nrm2217
2008	4	Klionsky DJ, 2008, AUTOPHAGY, V4, P151, DOI 10.4161/auto.5338
2018	4	Calio A, 2018, MODERN PATHOL, V31, P474, DOI 10.1038/modpathol.2017.144
2018	4	Chandra S, 2018, J NEUROSCI, V38, P6682, DOI 10.1523/JNEUROSCI.0054-18.2018
2015	4	Wang SY, 2015, SCIENCE, V347, P188, DOI 10.1126/science.1257132
1993	4	FERREDAMARE AR, 1993, NATURE, V363, P38, DOI 10.1038/363038a0
2016	4	Kim S, 2016, SCI REP-UK, V6, P0, DOI 10.1038/srep24933
2013	4	Laplante M, 2013, J CELL SCI, V126, P1713, DOI 10.1242/jcs.125773
2012	4	Rubinsztein DC, 2012, NAT REV DRUG DISCOV, V11, P709, DOI 10.1038/nrd3802
1993	4	AYER DE, 1993, CELL, V72, P211, DOI 10.1016/0092-8674(93)90661-9
2016	4	Bartlett JJ, 2016, BIOCHEM J, V473, P3769, DOI 10.1042/BCJ20160385
2001	4	Weterman MAJ, 2001, P NATL ACAD SCI USA, V98, P13808, DOI 10.1073/pnas.241304198
2016	4	Lim CY, 2016, J CELL BIOL, V214, P653, DOI 10.1083/jcb.201607005
2012	4	Petersson F, 2012, HUM PATHOL, V43, P726, DOI 10.1016/j.humpath.2011.07.001
2011	4	Mihaylova MM, 2011, NAT CELL BIOL, V13, P1016, DOI 10.1038/ncb2329
2017	4	Classe M, 2017, HISTOPATHOLOGY, V70, P1089, DOI 10.1111/his.13167
2016	4	Li XS, 2016, CELL DEATH DIS, V7, P0, DOI 10.1038/cddis.2016.433
2016	4	Rega LR, 2016, KIDNEY INT, V89, P862, DOI 10.1016/j.kint.2015.12.045
2016	4	Fullgrabe J, 2016, J CELL SCI, V129, P3059, DOI 10.1242/jcs.188920
2015	4	Thomes PG, 2015, ALCOHOL CLIN EXP RES, V39, P2354, DOI 10.1111/acer.12904
1997	4	Clark J, 1997, ONCOGENE, V15, P2233, DOI 10.1038/sj.onc.1201394
2011	4	Rubinsztein DC, 2011, CELL, V146, P682, DOI 10.1016/j.cell.2011.07.030
2012	4	Rong YG, 2012, NAT CELL BIOL, V14, P924, DOI 10.1038/ncb2557
1995	4	ARTANDI SE, 1995, NUCLEIC ACIDS RES, V23, P3865, DOI 10.1093/nar/23.19.3865
2016	4	Calcagni A, 2016, ELIFE, V5, P0, DOI 10.7554/eLife.17047
2013	4	Lira VA, 2013, FASEB J, V27, P4184, DOI 10.1096/fj.13-228486
2014	4	Luzio JP, 2014, CSH PERSPECT BIOL, V6, P0, DOI 10.1101/cshperspect.a016840
2005	4	Komatsu M, 2005, J CELL BIOL, V169, P425, DOI 10.1083/jcb.200412022
2010	4	Zhan HQ, 2010, J CLIN ONCOL, V28, P0, DOI 10.1200/JCO.2010.30.3172
2014	4	Lee JM, 2014, NATURE, V516, P112, DOI 10.1038/nature13961
2016	4	Wada S, 2016, GENE DEV, V30, P2551, DOI 10.1101/gad.287953.116
2018	4	Sciarretta S, 2018, J AM COLL CARDIOL, V71, P1999, DOI 10.1016/j.jacc.2018.02.066
2015	4	Mauvezin C, 2015, NAT COMMUN, V6, P0, DOI 10.1038/ncomms8007
2011	4	Mizushima N, 2011, ANNU REV CELL DEV BI, V27, P107, DOI 10.1146/annurev-cellbio-092910-154005
2016	4	Najibi M, 2016, CELL REP, V15, P1728, DOI 10.1016/j.celrep.2016.04.052
2015	4	Frake RA, 2015, J CLIN INVEST, V125, P65, DOI 10.1172/JCI73944
2000	4	Wu M, 2000, GENE DEV, V14, P301
2017	4	Lu SY, 2017, PLOS ONE, V12, P0, DOI 10.1371/journal.pone.0173771
1998	4	Hemesath TJ, 1998, NATURE, V391, P298, DOI 10.1038/34681
2018	4	Chao XJ, 2018, AUTOPHAGY, V14, P1646, DOI 10.1080/15548627.2018.1489170
2017	4	Castellano BM, 2017, SCIENCE, V355, P1306, DOI 10.1126/science.aag1417
2012	4	Mindell JA, 2012, ANNU REV PHYSIOL, V74, P69, DOI 10.1146/annurev-physiol-012110-142317
2001	4	Weilbaecher KN, 2001, MOL CELL, V8, P749, DOI 10.1016/S1097-2765(01)00360-4
2013	4	Rao Q, 2013, INT J CLIN EXP PATHO, V6, P1452
2014	4	Guan J, 2014, EMBO MOL MED, V6, P1493, DOI 10.15252/emmm.201404190
2006	4	Ramphal R, 2006, AM J CLIN PATHOL, V126, P349, DOI 10.1309/98YE9E442ARLX2X
2012	4	Macher-Goeppinger S, 2012, MODERN PATHOL, V25, P308, DOI 10.1038/modpathol.2011.169
2001	4	Heimann P, 2001, CANCER RES, V61, P4130
2010	3	Zhong MH, 2010, AM J SURG PATHOL, V34, P757, DOI 10.1097/PAS.0b013e3181dd577e
2013	3	Doi H, 2013, J NEUROSCI, V33, P7710, DOI 10.1523/JNEUROSCI.3021-12.2013
2012	3	Kaushik S, 2012, TRENDS CELL BIOL, V22, P407, DOI 10.1016/j.tcb.2012.05.006
1990	3	CAI MJ, 1990, CELL, V61, P437, DOI 10.1016/0092-8674(90)90525-J
2010	3	Wong E, 2010, NAT NEUROSCI, V13, P805, DOI 10.1038/nn.2575
1994	3	BENTLEY NJ, 1994, MOL CELL BIOL, V14, P7996, DOI 10.1128/MCB.14.12.7996
2007	3	Mizushima N, 2007, AUTOPHAGY, V3, P542, DOI 10.4161/auto.4600
2012	3	Alers S, 2012, MOL CELL BIOL, V32, P2, DOI 10.1128/MCB.06159-11
2014	3	Scott I, 2014, J BIOL CHEM, V289, P2864, DOI 10.1074/jbc.M113.521641
2009	3	Argani P, 2009, AM J SURG PATHOL, V33, P609, DOI 10.1097/PAS.0b013e31818fbdff
2004	3	Argani P, 2004, TUMORS URINARY SYSTE, V0, P37
2016	3	Bouche V, 2016, AUTOPHAGY, V12, P484, DOI 10.1080/15548627.2015.1134081
2009	3	Lubke T, 2009, BBA-MOL CELL RES, V1793, P625, DOI 10.1016/j.bbamcr.2008.09.018
2012	3	Shen DB, 2012, NAT COMMUN, V3, P0, DOI 10.1038/ncomms1735
2003	3	Argani P, 2003, PATHOLOGY, V35, P492, DOI 10.1080/00313020310001619901
2008	3	Boland B, 2008, J NEUROSCI, V28, P6926, DOI 10.1523/JNEUROSCI.0800-08.2008
2016	3	Garrity AG, 2016, ELIFE, V5, P0, DOI 10.7554/eLife.15887
2013	3	Jewell JL, 2013, NAT REV MOL CELL BIO, V14, P133, DOI 10.1038/nrm3522
2012	3	Harris H, 2012, NAT REV NEUROL, V8, P108, DOI 10.1038/nrneurol.2011.200
2014	3	Menon S, 2014, CELL, V156, P771, DOI 10.1016/j.cell.2013.11.049
2009	3	Hosokawa N, 2009, MOL BIOL CELL, V20, P1981, DOI 10.1091/mbc.E08-12-1248
2012	3	Tsunemi T, 2012, SCI TRANSL MED, V4, P0
2016	3	Ballabio A, 2016, EMBO MOL MED, V8, P73, DOI 10.15252/emmm.201505966
2011	3	Yokoyama S, 2011, NATURE, V480, P99, DOI 10.1038/nature10630
2013	3	Creighton CJ, 2013, NATURE, V499, P43, DOI 10.1038/nature12222
2012	3	Ma XC, 2012, CIRCULATION, V125, P3170, DOI 10.1161/CIRCULATIONAHA.111.041814
2009	3	Eskelinen EL, 2009, BBA-MOL CELL RES, V1793, P664, DOI 10.1016/j.bbamcr.2008.07.014
2010	3	Malouf GG, 2010, ANN ONCOL, V21, P1834, DOI 10.1093/annonc/mdq029
2007	3	Klionsky DJ, 2007, NAT REV MOL CELL BIO, V8, P931, DOI 10.1038/nrm2245
2013	3	Fullgrabe J, 2013, NATURE, V500, P468, DOI 10.1038/nature12313
2010	3	Lipinski MM, 2010, P NATL ACAD SCI USA, V107, P14164, DOI 10.1073/pnas.1009485107
1998	3	Amae S, 1998, BIOCHEM BIOPH RES CO, V247, P710, DOI 10.1006/bbrc.1998.8838
2010	3	Lee JH, 2010, CELL, V141, P1146, DOI 10.1016/j.cell.2010.05.008
2013	3	Betschinger J, 2013, CELL, V153, P335, DOI 10.1016/j.cell.2013.03.012
2011	3	Korolchuk VI, 2011, NAT CELL BIOL, V13, P453, DOI 10.1038/ncb2204
2016	3	Bento CF, 2016, ANNU REV BIOCHEM, V85, P685, DOI 10.1146/annurev-biochem-060815-014556
2010	3	Malagelada C, 2010, J NEUROSCI, V30, P1166, DOI 10.1523/JNEUROSCI.3944-09.2010
1990	3	BLACKWELL TK, 1990, SCIENCE, V250, P1149, DOI 10.1126/science.2251503
2011	3	Strub T, 2011, ONCOGENE, V30, P2319, DOI 10.1038/onc.2010.612
2012	3	Coen K, 2012, J CELL BIOL, V198, P23, DOI 10.1083/jcb.201201076
2015	3	Campbell GR, 2015, PLOS PATHOG, V11, P0, DOI 10.1371/journal.ppat.1005018
2006	3	Mueller-Steiner S, 2006, NEURON, V51, P703, DOI 10.1016/j.neuron.2006.07.027
2007	3	Kimura S, 2007, AUTOPHAGY, V3, P452, DOI 10.4161/auto.4451
2013	3	Feeney EJ, 2013, AUTOPHAGY, V9, P1117, DOI 10.4161/auto.24920
2015	3	Efeyan A, 2015, NATURE, V517, P302, DOI 10.1038/nature14190
2014	3	Feng YC, 2014, CELL RES, V24, P24, DOI 10.1038/cr.2013.168
2008	3	Iwai-Kanai E, 2008, AUTOPHAGY, V4, P322, DOI 10.4161/auto.5603
1995	3	AYER DE, 1995, CELL, V80, P767, DOI 10.1016/0092-8674(95)90355-0
2005	3	Martigioni G, 2005, MODERN PATHOL, V18, P0
2013	3	Samie M, 2013, DEV CELL, V26, P511, DOI 10.1016/j.devcel.2013.08.003
2011	3	Urbanelli Lorena, 2011, Recent Pat CNS Drug Discov, V6, P1, DOI 10.2174/157488911794079127
2012	3	Ma XC, 2012, AUTOPHAGY, V8, P297, DOI 10.4161/auto.18658
2004	2	LAE M, 2004, MOD PATHOL S1, V17, P0
2007	2	Meyer PN, 2007, AM J CLIN PATHOL, V128, P70, DOI 10.1309/LR5G1VMXPY3G0CUK
1989	2	DANG CV, 1989, NATURE, V337, P664, DOI 10.1038/337664a0
2006	2	Hes Ondrej, 2006, Ann Diagn Pathol, V10, P133, DOI 10.1016/j.anndiagpath.2005.12.002
1991	2	OSHEA EK, 1991, SCIENCE, V254, P539, DOI 10.1126/science.1948029
2001	2	Chang KL, 2001, ADV ANAT PATHOL, V8, P273, DOI 10.1097/00125480-200109000-00004
2007	2	Forgac M, 2007, NAT REV MOL CELL BIO, V8, P917, DOI 10.1038/nrm2272
1992	2	BLANAR MA, 1992, SCIENCE, V256, P1014, DOI 10.1126/science.1589769
2006	2	Selle B, 2006, CANCER-AM CANCER SOC, V107, P2906, DOI 10.1002/cncr.22346
2008	2	Settembre C, 2008, HUM MOL GENET, V17, P119, DOI 10.1093/hmg/ddm289
2006	2	Adley BP, 2006, ANAL QUANT CYTOL, V28, P228
1995	2	MOORE KJ, 1995, TRENDS GENET, V11, P442, DOI 10.1016/S0168-9525(00)89143-X
2006	2	Gao MG, 2006, NAT CELL BIOL, V8, P657, DOI 10.1038/ncb1419
2011	2	Chapman-Fredricks JR, 2011, ANN DIAGN PATHOL, V15, P333, DOI 10.1016/j.anndiagpath.2011.03.002
1998	2	Bertolotto C, 1998, MOL CELL BIOL, V18, P694, DOI 10.1128/MCB.18.2.694
1998	2	Price ER, 1998, J BIOL CHEM, V273, P17983, DOI 10.1074/jbc.273.29.17983
2003	2	Perot C, 2003, CANCER GENET CYTOGEN, V143, P93, DOI 10.1016/S0165-4608(02)00851-8
2011	2	Hsu PP, 2011, SCIENCE, V332, P1317, DOI 10.1126/science.1199498
1994	2	HEMESATH TJ, 1994, GENE DEV, V8, P2770, DOI 10.1101/gad.8.22.2770
2003	2	Argani P, 2003, ADV ANAT PATHOL, V10, P243, DOI 10.1097/00125480-200309000-00001
1993	2	ANDREWS NC, 1993, NATURE, V362, P722, DOI 10.1038/362722a0
1994	2	ROSS IL, 1994, ONCOGENE, V9, P121
1996	2	Petrovic N, 1996, J BIOL CHEM, V271, P22499, DOI 10.1074/jbc.271.37.22499
1999	2	De Cesare D, 1999, TRENDS BIOCHEM SCI, V24, P281, DOI 10.1016/S0968-0004(99)01414-0
2004	2	Giangrande PH, 2004, EMBO J, V23, P1336, DOI 10.1038/sj.emboj.7600134
1999	2	Rehli M, 1999, J IMMUNOL, V162, P1559
1998	2	Aksan I, 1998, MOL CELL BIOL, V18, P6930, DOI 10.1128/MCB.18.12.6930
2006	2	Komatsu M, 2006, NATURE, V441, P880, DOI 10.1038/nature04723
2001	2	Huang FS, 2001, J PEDIAT HEMATOL ONC, V23, P609, DOI 10.1097/00043426-200112000-00011
1994	2	GLASS CK, 1994, ENDOCR REV, V15, P391, DOI 10.1210/er.15.3.391
1988	2	LANDSCHULZ WH, 1988, SCIENCE, V240, P1759, DOI 10.1126/science.3289117
1997	2	Yasumoto K, 1997, J BIOL CHEM, V272, P503
2002	2	Mansky KC, 2002, J LEUKOCYTE BIOL, V71, P304
2009	2	Feldman ME, 2009, PLOS BIOL, V7, P371, DOI 10.1371/journal.pbio.1000038
2006	2	Bronisz A, 2006, MOL BIOL CELL, V17, P3897, DOI 10.1091/mbc.E06-05-0470
1994	2	FERREDAMARE AR, 1994, EMBO J, V13, P180, DOI 10.1002/j.1460-2075.1994.tb06247.x
1997	2	Atchley WR, 1997, P NATL ACAD SCI USA, V94, P5172, DOI 10.1073/pnas.94.10.5172
1993	2	HODGKINSON CA, 1993, CELL, V74, P395, DOI 10.1016/0092-8674(93)90429-T
2000	2	Weterman MAJ, 2000, ONCOGENE, V19, P69, DOI 10.1038/sj.onc.1203255
1996	2	Sidhar SK, 1996, HUM MOL GENET, V5, P1333, DOI 10.1093/hmg/5.9.1333
2013	2	Efeyan A, 2013, NATURE, V493, P679, DOI 10.1038/nature11745
1993	2	BLACKWELL TK, 1993, MOL CELL BIOL, V13, P5216, DOI 10.1128/MCB.13.9.5216
1989	2	OSHEA EK, 1989, SCIENCE, V243, P538, DOI 10.1126/science.2911757
1999	2	Shi Q, 1999, CIRC RES, V85, P479, DOI 10.1161/01.RES.85.6.479
1996	2	Weterman MAJ, 1996, P NATL ACAD SCI USA, V93, P15294, DOI 10.1073/pnas.93.26.15294
2006	2	LaPlante JM, 2006, MOL GENET METAB, V89, P339, DOI 10.1016/j.ymgme.2006.05.016
1997	2	Ying LH, 1997, J BIOL CHEM, V272, P2412
2008	2	Gobbo S, 2008, AM J SURG PATHOL, V32, P1239, DOI 10.1097/PAS.0b013e318164bcbb
1990	2	BENEZRA R, 1990, CELL, V61, P49, DOI 10.1016/0092-8674(90)90214-Y
2008	2	Brunelli M, 2008, MODERN PATHOL, V21, P1, DOI 10.1038/modpathol.3800967
2000	2	Adelman DM, 2000, GENE DEV, V14, P3191, DOI 10.1101/gad.853700
2004	2	Hershey CL, 2004, BONE, V34, P689, DOI 10.1016/j.bone.2003.08.014
1992	2	ELLENBERGER TE, 1992, CELL, V71, P1223, DOI 10.1016/S0092-8674(05)80070-4
2004	2	Bruder E, 2004, AM J SURG PATHOL, V28, P1117, DOI 10.1097/01.pas.0000131558.32412.40
1998	2	Weilbaecher KN, 1998, J EXP MED, V187, P775, DOI 10.1084/jem.187.5.775
2000	2	Hallsson JH, 2000, GENETICS, V155, P291
2002	2	Bodmer D, 2002, HUM MOL GENET, V11, P2489, DOI 10.1093/hmg/11.20.2489
2008	2	Choo AY, 2008, P NATL ACAD SCI USA, V105, P17414, DOI 10.1073/pnas.0809136105
2013	2	Bonaldo P, 2013, DIS MODEL MECH, V6, P25, DOI 10.1242/dmm.010389
2006	2	Kochl R, 2006, TRAFFIC, V7, P129, DOI 10.1111/j.1600-0854.2005.00368.x
1997	2	Glass CK, 1997, CURR OPIN CELL BIOL, V9, P222, DOI 10.1016/S0955-0674(97)80066-X
2007	2	Rais-Bahrami S, 2007, UROLOGY, V70, P0, DOI 10.1016/j.urology.2007.03.037
2012	2	Cox TM, 2012, J PATHOL, V226, P241, DOI 10.1002/path.3021
1999	2	Renshaw AA, 1999, AM J SURG PATHOL, V23, P795, DOI 10.1097/00000478-199907000-00007
2009	2	Dong XP, 2009, J BIOL CHEM, V284, P32040, DOI 10.1074/jbc.M109.037184
2013	2	Cang CL, 2013, CELL, V152, P778, DOI 10.1016/j.cell.2013.01.023
1997	2	Guru SC, 1997, GENOME RES, V7, P725, DOI 10.1101/gr.7.7.725
1991	2	ROMAN C, 1991, SCIENCE, V254, P94, DOI 10.1126/science.1840705
1994	2	STEINGRIMSSON E, 1994, NAT GENET, V8, P256, DOI 10.1038/ng1194-256
1994	2	BARBAS SM, 1994, J AM CHEM SOC, V116, P2161, DOI 10.1021/ja00084a073
2009	2	Chen RQ, 2009, CANCER RES, V69, P2663, DOI 10.1158/0008-5472.CAN-08-3222
1997	2	Yasumoto K, 1997, BBA-GENE STRUCT EXPR, V1353, P23, DOI 10.1016/S0167-4781(97)00034-1
2008	2	Dephoure N, 2008, P NATL ACAD SCI USA, V105, P10762, DOI 10.1073/pnas.0805139105
2000	2	van Asseldonk M, 2000, GENOMICS, V66, P35, DOI 10.1006/geno.2000.6194
1997	2	Yan Y, 1997, CIRC RES, V81, P558, DOI 10.1161/01.RES.81.4.558
2013	2	Avrahami L, 2013, J BIOL CHEM, V288, P1295, DOI 10.1074/jbc.M112.409250
2006	2	Cheng JL, 2006, BIOCHEM BIOPH RES CO, V351, P246, DOI 10.1016/j.bbrc.2006.10.042
2014	2	Acebron SP, 2014, MOL CELL, V54, P663, DOI 10.1016/j.molcel.2014.04.014
2009	2	Koie T, 2009, INT J UROL, V16, P333, DOI 10.1111/j.1442-2042.2008.02231.x
1993	2	ZHAO GQ, 1993, MOL CELL BIOL, V13, P4505, DOI 10.1128/MCB.13.8.4505
2005	2	Rehli M, 2005, J IMMUNOL, V174, P7111, DOI 10.4049/jimmunol.174.11.7111
1994	2	AMATI B, 1994, CURR OPIN GENET DEV, V4, P102, DOI 10.1016/0959-437X(94)90098-1
1997	2	Sato S, 1997, ONCOGENE, V14, P3083, DOI 10.1038/sj.onc.1201298
1990	2	GREGOR PD, 1990, GENE DEV, V4, P1730, DOI 10.1101/gad.4.10.1730
1996	2	Dijkhuizen T, 1996, CANCER GENET CYTOGEN, V91, P141
1992	2	ANTHONYCAHILL SJ, 1992, SCIENCE, V255, P979, DOI 10.1126/science.1312255
1989	2	MURRE C, 1989, CELL, V56, P777, DOI 10.1016/0092-8674(89)90682-X
2002	2	Widlund HR, 2002, J CELL BIOL, V158, P1079, DOI 10.1083/jcb.200202049
2007	2	Tsuda M, 2007, CANCER RES, V67, P919, DOI 10.1158/0008-5472.CAN-06-2855
1986	1	CHODOSH LA, 1986, MOL CELL BIOL, V6, P4723, DOI 10.1128/MCB.6.12.4723
1990	1	GARTENBERG MR, 1990, P NATL ACAD SCI USA, V87, P6034, DOI 10.1073/pnas.87.16.6034
1991	1	BAIROCH A, 1991, NUCLEIC ACIDS RES, V19, P2247, DOI 10.1093/nar/19.suppl.2247
1995	1	BOUCHER PD, 1995, MOL CELL BIOL, V15, P5144
1995	1	ANDERSON ME, 1995, BIOESSAYS, V17, P3, DOI 10.1002/bies.950170103
1999	1	Arango NA, 1999, CELL, V99, P409, DOI 10.1016/S0092-8674(00)81527-5
1987	1	BRAM RJ, 1987, MOL CELL BIOL, V7, P403, DOI 10.1128/MCB.7.1.403
1991	1	CLACKSON T, 1991, NATURE, V352, P624, DOI 10.1038/352624a0
2003	1	Chilosi M, 2003, AM J PATHOL, V162, P1495, DOI 10.1016/S0002-9440(10)64282-4
1990	1	BISCHOFF JR, 1990, P NATL ACAD SCI USA, V87, P4766, DOI 10.1073/pnas.87.12.4766
1990	1	BAKER RE, 1990, MOL CELL BIOL, V10, P2458, DOI 10.1128/MCB.10.6.2458
2007	1	Acharyya S, 2007, J CLIN INVEST, V117, P889, DOI 10.1172/JCI30556
1987	1	DEPINHO RA, 1987, GENE DEV, V1, P1311, DOI 10.1101/gad.1.10.1311
1990	1	BAKER RA, 1990, MO CELL BIOL, V10, P1458
2003	1	ARGANI P, 2003, PATHOLOGY GENETICS T, V0, P37
1997	1	Bartolomei MS, 1997, ANNU REV GENET, V31, P493, DOI 10.1146/annurev.genet.31.1.493
1995	1	CIELINSKI MJ, 1995, BONE, V16, P567, DOI 10.1016/8756-3282(95)00080-W
2006	1	ARGANI P, 2006, AM J CLIN PATHOL, V26, P349
1999	1	Couse JF, 1999, SCIENCE, V286, P2328, DOI 10.1126/science.286.5448.2328
2002	1	*AM JOINT COMM CAN, 2002, AJCC CANC STAG MAN, V0, P0
1993	1	ALBERTI S, 1993, EMBO J, V12, P3227, DOI 10.1002/j.1460-2075.1993.tb05992.x
1998	1	Amiel J, 1998, CLIN DYSMORPHOL, V7, P17
1985	1	EPHRUSSI A, 1985, SCIENCE, V227, P134, DOI 10.1126/science.3917574
1994	1	CARTER ME, 1994, MOL CELL BIOL, V14, P4360, DOI 10.1128/MCB.14.7.4360
2007	1	Chu CT, 2007, AUTOPHAGY, V3, P663, DOI 10.4161/auto.4625
1991	1	BARBAS CF, 1991, P NATL ACAD SCI USA, V88, P7978, DOI 10.1073/pnas.88.18.7978
2001	1	Barthelemy C, 2001, ANN NEUROL, V49, P607, DOI 10.1002/ana.1002
2003	1	Bendiske J, 2003, J NEUROPATH EXP NEUR, V62, P451, DOI 10.1093/jnen/62.5.451
1990	1	BALDWIN AS, 1990, MOL CELL BIOL, V10, P1406, DOI 10.1128/MCB.10.4.1406
1999	1	Anderson KL, 1999, BLOOD, V94, P2310, DOI 10.1182/blood.V94.7.2310.419k34_2310_2318
1991	1	CHAKRABARTTY A, 1991, NATURE, V351, P586, DOI 10.1038/351586a0
2002	1	Brody T, 2002, MECH DEVELOP, V113, P41, DOI 10.1016/S0925-4773(02)00010-2
1989	1	BEGLEY CG, 1989, P NATL ACAD SCI USA, V86, P10128, DOI 10.1073/pnas.86.24.10128
1993	1	ANDREWS NC, 1993, P NATL ACAD SCI USA, V90, P11488, DOI 10.1073/pnas.90.24.11488
2000	1	Bao B, 2000, BIOL REPROD, V63, P1747, DOI 10.1095/biolreprod63.6.1747
1996	1	Bommarito GM, 1996, J CHEM PHYS, V105, P5265, DOI 10.1063/1.472367
1987	1	CHODOSH LA, 1987, SCIENCE, V238, P684, DOI 10.1126/science.3672119
1995	1	ABARZUA P, 1995, CANCER RES, V55, P3490
2003	1	Antequera F, 2003, CELL MOL LIFE SCI, V60, P1647, DOI 10.1007/s00018-003-3088-6
1996	1	Davis AF, 1996, NUCLEIC ACIDS RES, V24, P2753, DOI 10.1093/nar/24.14.2753
2004	1	AMIN MB, 2004, WHO CLASSIFICATION T, V0, P68
1992	1	BACH MA, 1992, ENDOCRINOLOGY, V131, P2588, DOI 10.1210/en.131.6.2588
1987	1	ARUFFO A, 1987, P NATL ACAD SCI USA, V84, P8573, DOI 10.1073/pnas.84.23.8573
2004	1	ARGANI P, 2004, TUMOURS URINARY SYST, V0, P37
1999	1	Adelman DM, 1999, GENE DEV, V13, P2478, DOI 10.1101/gad.13.19.2478
1989	1	BAKER RE, 1989, J BIOL CHEM, V264, P10843
2002	1	Altschmied J, 2002, GENETICS, V161, P259
1997	1	BAKER RK, 1997, DEV BIOL, V185, P210
1991	1	BALDWIN AS, 1991, CURRENT PROTOCOLS MO, V2, P0
1996	1	Bertolotto C, 1996, J CELL BIOL, V134, P747, DOI 10.1083/jcb.134.3.747
1992	1	BARBAS CF, 1992, P NATL ACAD SCI USA, V89, P4457, DOI 10.1073/pnas.89.10.4457
1997	1	Anderson DM, 1997, NATURE, V390, P175, DOI 10.1038/36593
2003	1	Boya P, 2003, J EXP MED, V197, P1323, DOI 10.1084/jem.20021952
1996	1	Akagawa KS, 1996, BLOOD, V88, P4029, DOI 10.1182/blood.V88.10.4029.bloodjournal88104029
1989	1	CHOTHIA C, 1989, NATURE, V342, P877, DOI 10.1038/342877a0
1994	1	ARTANDI SE, 1994, MOL CELL BIOL, V14, P704
2006	1	Barrachina M, 2006, NEUROPATH APPL NEURO, V32, P505, DOI 10.1111/j.1365-2990.2006.00756.x
2009	1	Ballabio A, 2009, BBA-MOL CELL RES, V1793, P684, DOI 10.1016/j.bbamcr.2008.12.001
2009	1	Chu YP, 2009, NEUROBIOL DIS, V35, P385, DOI 10.1016/j.nbd.2009.05.023
2000	1	Bell AC, 2000, NATURE, V405, P482, DOI 10.1038/35013100
2006	1	Argani P, 2006, AM J CLIN PATHOL, V126, P332, DOI 10.1309/EAEJTJGD5J4JB4F
1993	1	AMIN C, 1993, MOL CELL BIOL, V13, P383, DOI 10.1128/MCB.13.1.383
2000	1	Adams MD, 2000, SCIENCE, V287, P2185, DOI 10.1126/science.287.5461.2185
1994	1	Als-Nielsen J, 1994, Physics Reports, V246, P251, DOI 10.1016/0370-1573(94)90046-9
2007	1	Chen YQ, 2007, J CELL SCI, V120, P4155, DOI 10.1242/jcs.011163
1994	1	BLACKWELL TK, 1994, SCIENCE, V266, P621, DOI 10.1126/science.7939715
1995	1	BUSFIELD SJ, 1995, CELL GROWTH DIFFER, V6, P429
1992	1	BARRETT J, 1992, MOL CELL BIOL, V12, P3130, DOI 10.1128/MCB.12.7.3130
1995	1	BUSFIELD SJ, 1995, EUR J BIOCHEM, V230, P475
1992	1	BUSFIELD SJ, 1992, BLOOD, V80, P412
1989	1	BURGLIN TR, 1989, NATURE, V341, P239, DOI 10.1038/341239a0
1997	1	Bellorini M, 1997, NUCLEIC ACIDS RES, V25, P2174, DOI 10.1093/nar/25.11.2174
1995	1	DAIRAGHI DJ, 1995, BBA-MOL BASIS DIS, V1271, P127, DOI 10.1016/0925-4439(95)00019-Z
1998	1	Bora N, 1998, DEV DYNAM, V213, P283, DOI 10.1002/(SICI)1097-0177(199811)213:33.0.CO;2-H
1988	1	BODNER M, 1988, CELL, V55, P505, DOI 10.1016/0092-8674(88)90037-2
1999	1	Drummond AE, 1999, MOL CELL ENDOCRINOL, V151, P57, DOI 10.1016/S0303-7207(99)00038-6
1990	1	AKIRA S, 1990, EMBO J, V9, P1897, DOI 10.1002/j.1460-2075.1990.tb08316.x
1998	1	De Santa Barbara P, 1998, MOL CELL BIOL, V18, P6653, DOI 10.1128/MCB.18.11.6653
2003	1	Ando T, 2003, ENDOCRINOLOGY, V144, P671, DOI 10.1210/en.2002-220582
1986	1	BAKER RE, 1986, J BIOL CHEM, V261, P5275
1993	1	AMATI B, 1993, CELL, V72, P233, DOI 10.1016/0092-8674(93)90663-B
1985	1	CARTHEW RW, 1985, CELL, V43, P439, DOI 10.1016/0092-8674(85)90174-6
1995	1	BAARENDS WM, 1995, ENDOCRINOLOGY, V136, P4951, DOI 10.1210/en.136.11.4951
1999	1	Boyd KE, 1999, MOL CELL BIOL, V19, P8393
1994	1	BOTTINGER EP, 1994, MOL CELL BIOL, V14, P2604
2008	1	Castino R, 2008, J NEUROCHEM, V106, P1426, DOI 10.1111/j.1471-4159.2008.05488.x
1994	1	Ausubel FM, 1994, CURRENT PROTOCOLS MO, V0, P0
1994	1	CHANG ZF, 1994, J BIOL CHEM, V269, P17893
1997	1	Baylin SB, 1997, SCIENCE, V277, P1948, DOI 10.1126/science.277.5334.1948
1998	1	Andrews NC, 1998, INT J BIOCHEM CELL B, V30, P429, DOI 10.1016/S1357-2725(97)00135-0
2004	1	Aharon-Peretz J, 2004, NEW ENGL J MED, V351, P1972, DOI 10.1056/NEJMoa033277
1994	1	CIELINSKI MJ, 1994, BONE, V15, P707, DOI 10.1016/8756-3282(94)90321-2
